# Supplementary material
Source: publisher figshare collection journal article supplement (https://acs.figshare.com/ndownloader/files/4220047)

# **Palladium(II)-Catalyzed C-C Bond Formation of Arylhydrazines with Olefins via Carbon-Nitrogen Bond Cleavage**

Ming-Kui, Zhu, Jun-Feng Zhao and Teck-Peng Loh\*

Division of Chemistry and Biological Chemistry, School of Physical and Mathematical Sciences,

Nanyang Technological University, Singapore 637371

E-mail: teckpeng@ntu.edu.sg

## **Supporting Information**

| Table of Contents                                                                                                      | Page |
|------------------------------------------------------------------------------------------------------------------------|------|
| General Methods                                                                                                        | S-1  |
| Screening of the optimal conditions                                                                                    | S-2  |
| Procedure for Palladium(II)-Catalyzed C-C bond formation of aniline with <i>tert</i> -butyl acrylate                   | S-3  |
| General Procedure for Palladium(II)-Catalyzed C-C bond formation of Arylhydrazines with Olefins                        | S-3  |
| Procedure for synthesis of (2,9-dimethyl-1,10-phenanthroline)- 4-cyanophenyl -palladium(II) chloride (1h')             | S-4  |
| Procedure for Palladium(II)-Catalyzed C-C bond formation of N'-phenyl-acetohydrazide with <i>tert</i> -butyl acrylate: | S-4  |
| Characterization Data for the product                                                                                  | S-5  |
| Mechanistic study by employing ESI-MS                                                                                  | S-14 |
| <sup>1</sup> H NMR, <sup>13</sup> C NMR, and High Resolution Mass (HRMS) spectra                                       | S-16 |

## General Methods

Experiments involving moisture and/or air sensitive components were performed in oven-dried glassware under a positive pressure of nitrogen using freshly distilled solvents. Commercial grade solvents and reagents were used without further purification. Hexane, ethyl acetate were fractionally distilled.

Analytical thin layer chromatography (TLC) was performed using Merck 60 F254 pre-coated silica gel plate (0.2 mm thickness). Subsequent to elution, plates were visualized using UV radiation (254 nm) on Spectroline Model ENF-24061/F 254 nm. Further visualization was possible by staining with basic solution of potassium permanganate or acidic solution of ceric molybdate.

Flash chromatography was performed using Merck silica gel 60 with freshly distilled solvents. Columns were typically packed as slurry and equilibrated with the appropriate solvent system prior to use.

Infrared spectra were recorded on a Bio-Rad FTS 165 FTIR spectrometer. The oil samples were examined under neat conditions.

High Resolution Mass (HRMS) spectra were obtained using Waters Q-ToF Premier Mass Spectrometer.

Proton nuclear magnetic resonance spectra ( $^1\text{H}$  NMR) were recorded on a Bruker Avance DPX 300 and Bruker AMX 400 spectrophotometer ( $\text{CDCl}_3$  as solvent). Chemical shifts for  $^1\text{H}$  NMR spectra are reported as  $\delta$  in units of parts per million (ppm) downfield from  $\text{SiMe}_4$  ( $\delta$  0.0) and relative to the signal of chloroform-*d* ( $\delta$  7.2600, singlet). Multiplicities were given as: s (singlet); d (doublet); t (triplet); q (quartet); dd (doublets of doublet); ddd (doublets of doublets of doublet); dddd (doublets of doublets of doublets of doublet); dt (doublets of triplet); or m (multiplets). The number of protons (*n*) for a given resonance is indicated by *n*H. Coupling constants are reported as a *J* value in Hz. Carbon nuclear magnetic resonance spectra ( $^{13}\text{C}$  NMR) are reported as  $\delta$  in units of parts per million (ppm) downfield from  $\text{SiMe}_4$  ( $\delta$  0.0) and relative to the signal of chloroform-*d* ( $\delta$  77.0, triplet).

## Screening of the optimal conditions:

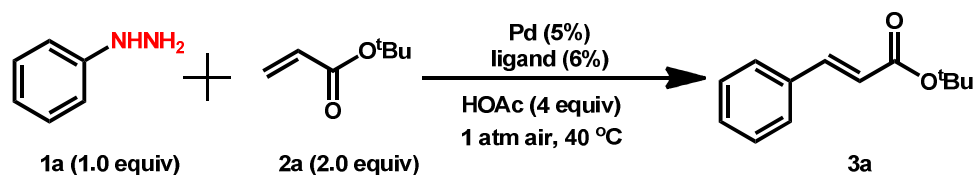

| entry             | Pd                                   | Ligand   | Solvent            | Time (h) | yield (3a) (%) <sup>b</sup> |
|-------------------|--------------------------------------|----------|--------------------|----------|-----------------------------|
| 1                 | NO                                   | NO       | DCE                | 2h       | trace                       |
| 2                 | Pd(OAc) <sub>2</sub>                 | NO       | DCE                | 4h       | 22%                         |
| 3                 | Pd(OAc) <sub>2</sub>                 | <b>A</b> | DCE                | 2h       | 68%                         |
| 4                 | PdCl <sub>2</sub>                    | <b>A</b> | DCE                | 2h       | 61%                         |
| 5                 | Pd(OCOCF <sub>3</sub> ) <sub>2</sub> | <b>A</b> | DCE                | 2h       | 57%                         |
| 6                 | Pd(dba) <sub>2</sub>                 | <b>A</b> | DCE                | 2h       | 41%                         |
| 7                 | Pd(OAc) <sub>2</sub>                 | <b>B</b> | DCE                | 2h       | 72%                         |
| 8                 | Pd(OAc) <sub>2</sub>                 | <b>C</b> | DCE                | 2h       | 81%                         |
| 9                 | Pd(OAc) <sub>2</sub>                 | <b>D</b> | DCE                | 2h       | 83%                         |
| 10                | Pd(OAc) <sub>2</sub>                 | <b>E</b> | DCE                | 2h       | 23%                         |
| 11                | Pd(OAc) <sub>2</sub>                 | <b>F</b> | DCE                | 2h       | 77%                         |
| 12                | Pd(OAc) <sub>2</sub>                 | <b>D</b> | THF                | 2h       | 75%                         |
| 13                | Pd(OAc) <sub>2</sub>                 | <b>D</b> | toluene            | 2h       | 80%                         |
| 14                | Pd(OAc) <sub>2</sub>                 | <b>D</b> | CH <sub>3</sub> CN | 2h       | 75%                         |
| 15                | Pd(OAc) <sub>2</sub>                 | <b>D</b> | DMSO               | 2h       | 51%                         |
| 16                | Pd(OAc) <sub>2</sub>                 | <b>D</b> | CHCl <sub>3</sub>  | 2h       | 78%                         |
| 17                | Pd(OAc) <sub>2</sub>                 | <b>D</b> | PhCl               | 2h       | 92%                         |
| 18                | Pd(OAc) <sub>2</sub>                 | <b>D</b> | 1,4-dioxane        | 2h       | 72%                         |
| 19                | Pd(OAc) <sub>2</sub>                 | <b>D</b> | MeOH               | 2h       | 85%                         |
| 20 <sup>c</sup>   | Pd(OAc) <sub>2</sub>                 | <b>D</b> | PhCl               | 2h       | 91%                         |
| 21 <sup>d</sup>   | Pd(OAc) <sub>2</sub>                 | <b>D</b> | PhCl               | 2h       | 91%                         |
| 21 <sup>d,e</sup> | Pd(OAc) <sub>2</sub>                 | <b>D</b> | PhCl/MeOH          | 2h       | 92%                         |

<sup>a</sup> Unless noted otherwise, the reactions were carried out on a 0.30 mmol scale of **1a** with 4 equiv of HOAc (1.2 mmol), and 2.0 equiv **2a** (0.6 mmol) in solvent (0.5 mL). <sup>b</sup> Isolated yield. <sup>c</sup> 50mg 4A<sup>o</sup> MS was added. <sup>d</sup> with 3% Pd(OAc)<sub>2</sub>. <sup>e</sup> reaction was done in PhCl:MeOH= 4:1(0.4 mL:0.1 mL).

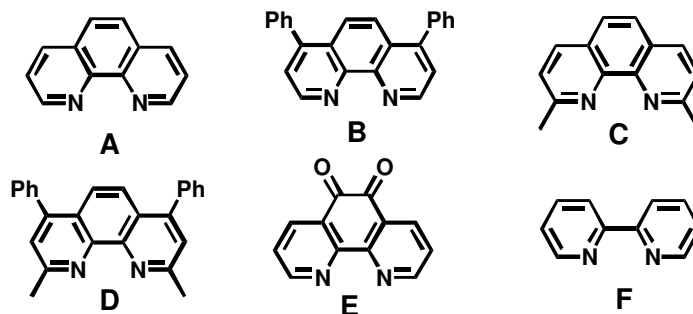

## Procedure for Palladium(II)-Catalyzed C-C bond formation of aniline with *tert*-butyl acrylate:

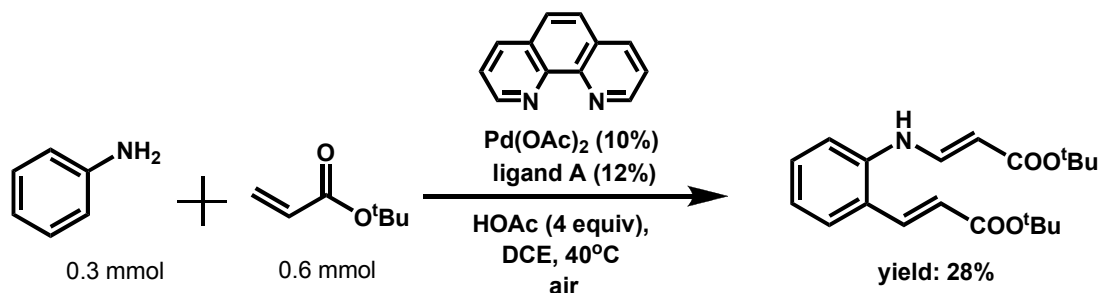

A 5 mL round bottomed flask equipped with a magnetic stirring bar was charged with aniline (0.30 mmol), Pd(OAc)<sub>2</sub> (10 mol %, 0.03 mmol), 1,10-phenanthroline (3.6 mol %, 0.036 mmol), *tert*-butyl acrylate (0.60 mmol) and 4 equiv of HOAc (1.2 mmol) in DCE. The flask was stirred at 40 °C in air (1 atm) for 12 h and judged by TLC. The reaction mixture was cooled to room temperature, The solvent was removed under the reduced pressure and the residue was purified through column chromatography on silica gel.

## General Procedure for Palladium(II)-Catalyzed C-C bond formation of arylhydrazines with olefins:

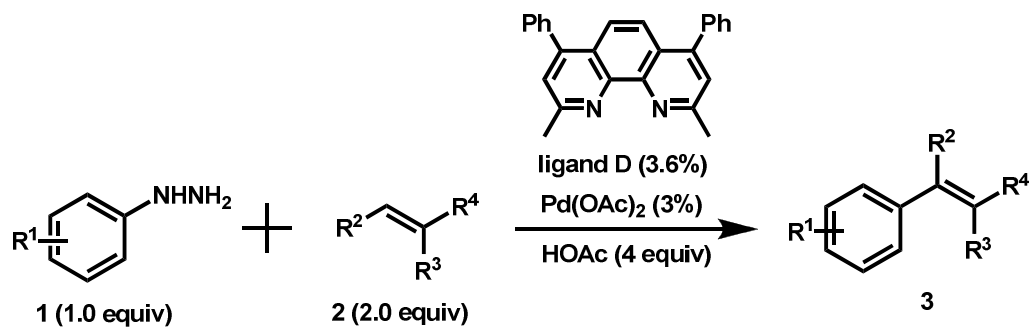

A 5 mL round bottomed flask equipped with a magnetic stirring bar was charged with arylhydrazine (0.30 mmol), Pd(OAc)<sub>2</sub> (3 mol %, 0.009 mmol), 2,9-dimethyl-4,7-diphenyl-1,10-phenanthroline (3.6 mol %, 0.0108 mmol), and 4 equiv of HOAc (1.2 mmol) in Ph / MeOH = 4:1 (0.4 mL:0.1 mL). The flask was stirred at 40 °C in air (1 atm) for 2-12 h and judged by TLC. The reaction mixture was cooled to room temperature, The solvent was removed under the reduced pressure and the residue was purified through column chromatography on silica gel.

## Procedure for synthesis of (2,9-dimethyl-1,10-phenanthroline)-

### 4-cyanophenyl-palladium(II) chloride (1h'):

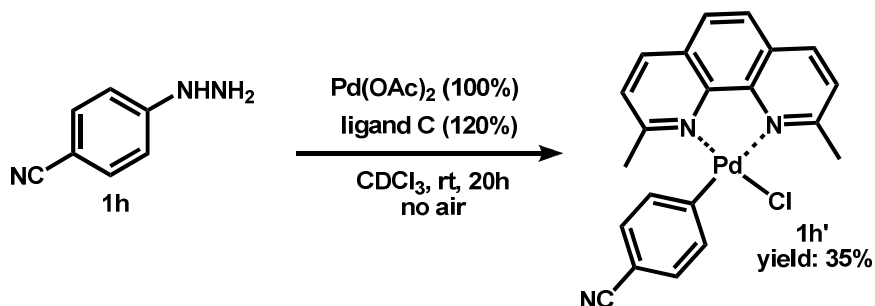

A solution of preformed Pd(OAc)<sub>2</sub> (67.3 mg, 0.3 mmol), 2,9-dimethyl-1,10-phenanthroline (75 mg, 0.36 mmol) in 2 mL of chloroform-d was treated with the 4-hydrazinylbenzonitrile (40 mg, 0.30 mmol) and the resulting mixture was stirred at room temperature for 12 h in glove-box. The solvent is removed under reduced pressure to a volume of approx. 0.2 mL and the crude product is precipitated by addition of 4 mL of absolute diethylether. The crude product is washed with further diethyl ether and the dried under reduced pressure. It is taken up in 3 mL of dichloromethane and filtered through a pad of Celite. The remaining solution is evaporated to dryness under reduced pressure to leave the product as a white solid.

## Procedure for Palladium(II)-Catalyzed C-C bond formation of

### N'-phenyl- acetohydrazide with *tert*-butyl acrylate:

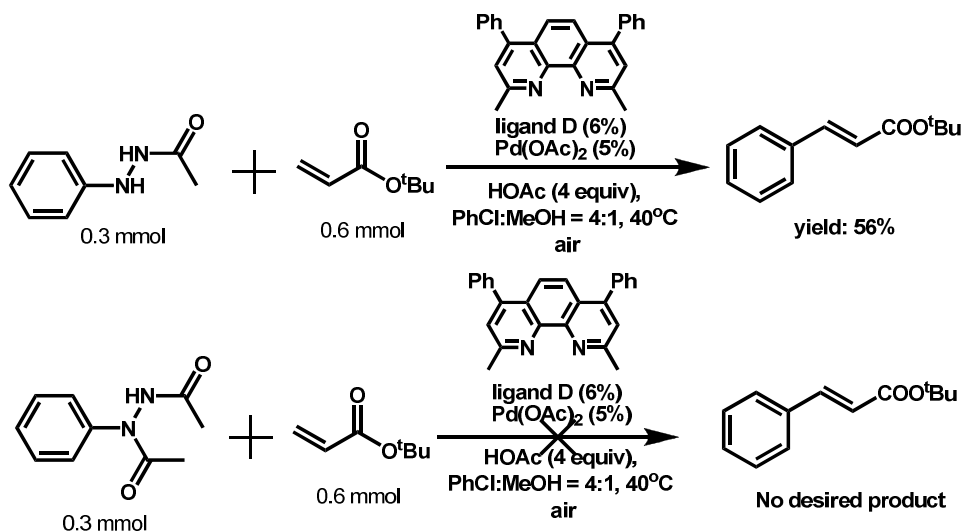

A 5 mL round bottomed flask equipped with a magnetic stirring bar was charged with N'-phenyl-acetohydrazide (0.30 mmol), Pd(OAc)<sub>2</sub> (5 mol %, 0.015 mmol), 2,9-dimethyl-4,7-diphenyl-1,10-phenanthroline (6 mol %, 0.018 mmol), *tert*-butyl acrylate (0.60 mmol) and 4 equiv of HOAc (1.2 mmol) in PhCl / MeOH = 4:1 (0.4 mL:0.1 mL). The

flask was stirred at 40 °C in air (1 atm) for 12 h and judged by TLC. The reaction mixture was cooled to room temperature, The solvent was removed under the reduced pressure and the residue was purified through column chromatography on silica gel.

### Characterization Data for the product

**(E)-tert-butyl 3-(2-((E)-3-tert-butoxy-3-oxoprop-1-enyl)phenylamino)acrylate:** This

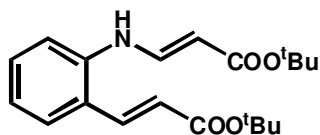

compound was prepared by the general procedure described above and was obtained as a yellow oil in 28% yield:  $R_f = 0.65$  (hexane : ethyl acetate = 7:1);  $^1\text{H}$  NMR (400 MHz,  $\text{CDCl}_3$ ):  $\delta$  10.70 (d, 1H,  $J = 12.8$  Hz, NH), 7.70 (d, 1H,  $J = 13.2$  Hz, ArH), 7.32-7.40 (m, 3H), 7.04-7.10 (m, 3H), 6.06 (d, 1H,  $J = 15.6$  Hz, CH), 1.58 (s, 9H, 3CH<sub>3</sub>), 1.50 (s, 9H, 3CH<sub>3</sub>) ppm;  $^{13}\text{C}$  NMR (100 MHz,  $\text{CDCl}_3$ ):  $\delta$  168.4, 167.9, 146.5, 141.8, 139.7, 129.8, 124.0, 116.5, 112.4, 99.8, 81.4, 79.4, 28.4, 28.3 ppm; HRMS (ESI,  $m/z$ ): calcd. for  $\text{C}_{20}\text{H}_{27}\text{NO}_4\text{H}^+$  346.2018, found 346.2022.

**tert-butyl cinnamate (3a):** This compound was prepared by the general procedure described

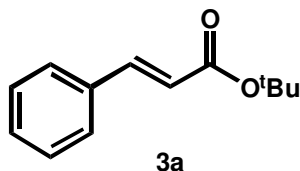

above and was obtained as a yellow oil in 91% yield:  $R_f = 0.72$  (hexane : ethyl acetate = 7:1);  $^1\text{H}$  NMR (400 MHz,  $\text{CDCl}_3$ ):  $\delta$  7.59 (d, 1H,  $J = 16.0$  Hz, CH), 7.49-7.52 (m, 2H, ArH), 7.36-7.38 (m, 3H, ArH), 6.37 (d, 1H,  $J = 16.0$  Hz, CH), 1.54 (s, 9H, 3CH<sub>3</sub>) ppm;  $^{13}\text{C}$  NMR (100 MHz,  $\text{CDCl}_3$ ):  $\delta$  166.3, 143.5, 134.7, 130.0, 128.8, 128.0, 120.2, 80.5, 28.2 ppm; HRMS (ESI,  $m/z$ ): calcd. for  $\text{C}_{13}\text{H}_{16}\text{O}_2\text{Na}^+$  227.1048, found 227.1042.

**(E)-tert-butyl 3-(4-methoxyphenyl)acrylate (3b):** This compound was prepared by the

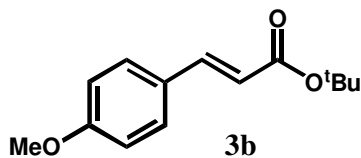

general procedure described above and was obtained as a yellow solid in 90% yield:  $R_f = 0.70$  (hexane : ethyl acetate = 7:1);  $\text{Mp} = 39.5\text{-}40.8$  °C;  $^1\text{H}$  NMR (400 MHz,  $\text{CDCl}_3$ ):  $\delta$  7.54 (d, 1H,  $J = 16.0$  Hz, CH), 7.45 (d, 2H,  $J = 8.4$  Hz, ArH), 6.88 (d, 2H,  $J = 8.8$  Hz, ArH), 6.24 (d, 1H,  $J = 16.0$  Hz, CH), 3.82 (s, 3H, OCH<sub>3</sub>), 1.52 (s, 9H, 3CH<sub>3</sub>) ppm;  $^{13}\text{C}$  NMR (100 MHz,  $\text{CDCl}_3$ ):  $\delta$  166.7, 161.1, 143.2, 129.6, 127.4, 117.7, 114.3, 80.2, 55.3, 28.2 ppm; HRMS (ESI,  $m/z$ ): calcd. for  $\text{C}_{14}\text{H}_{18}\text{O}_3\text{Na}^+$  257.1154, found 257.1158.

**(E)-tert-butyl 3-p-tolylacrylate (3c):** This compound was prepared by the general procedure

described above and was obtained as a yellow oil in 92% yield:  $R_f$  = 0.74 (hexane : ethyl

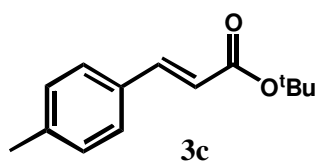

acetate = 7:1);  $^1\text{H}$  NMR (400 MHz,  $\text{CDCl}_3$ ):  $\delta$  7.57 (d, 1H,  $J$  = 16.0 Hz, CH), 7.40 (d, 2H,  $J$  = 8.0 Hz, ArH), 7.17 (d, 2H,  $J$  = 7.6 Hz, ArH), 6.33 (d, 1H,  $J$  = 16.0 Hz, CH), 2.36 (s, 3H,  $\text{CH}_3$ ), 1.54

(s, 9H, 3 $\text{CH}_3$ ) ppm;  $^{13}\text{C}$  NMR (100 MHz,  $\text{CDCl}_3$ ):  $\delta$  166.5, 143.6, 140.3, 132.0, 129.6, 128.0, 119.1, 80.3, 28.2, 21.4 ppm; HRMS (ESI,  $m/z$ ): calcd. for  $\text{C}_{14}\text{H}_{18}\text{O}_2\text{Na}^+$  241.1204, found 241.1199.

**(E)-tert-butyl 3-(4-fluorophenyl)acrylate (3d):** This compound was prepared by the general

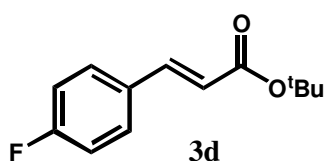

procedure described above and was obtained as a yellow oil in 85% yield:  $R_f$  = 0.75 (hexane : ethyl acetate = 7:1);  $^1\text{H}$  NMR (400 MHz,  $\text{CDCl}_3$ ):  $\delta$  7.54 (d, 1H,  $J$  = 16.0 Hz, CH), 7.46-7.49

(m, 2H, ArH), 7.02-7.07 (m, 2H, ArH), 6.28 (d, 1H,  $J$  = 16.0 Hz, CH), 1.52 (s, 9H, 3 $\text{CH}_3$ ) ppm;  $^{13}\text{C}$  NMR (100 MHz,  $\text{CDCl}_3$ ):  $\delta$  166.2, 163.6 (d,  $J$  = 237.0 Hz), 142.2, 130.9 (d,  $J$  = 3.3 Hz), 129.8 (d,  $J$  = 8.6 Hz), 120.0 (d,  $J$  = 2.1 Hz), 115.9 (d,  $J$  = 21.9 Hz), 80.6, 28.2 ppm; HRMS (ESI,  $m/z$ ): calcd. for  $\text{C}_{13}\text{H}_{15}\text{O}_2\text{FNa}^+$  245.0954, found 245.0950.

**(E)-tert-butyl 3-(4-chlorophenyl)acrylate (3e):** This compound was prepared by the general

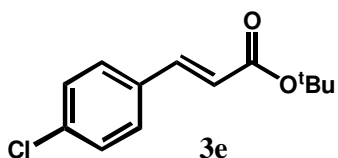

procedure described above and was obtained as a white solid in 85% yield:  $R_f$  = 0.74 (hexane : ethyl acetate = 7:1); Mp = 67.3-68.5 °C;  $^1\text{H}$  NMR (400 MHz,  $\text{CDCl}_3$ ):  $\delta$  7.52 (d, 1H,  $J$  =

16.0 Hz, CH), 7.42 (d, 2H,  $J$  = 8.4 Hz, ArH), 7.33 (d, 2H,  $J$  = 8.4 Hz, ArH), 6.33 (d, 1H,  $J$  = 16.0 Hz, CH), 1.52 (s, 9H, 3 $\text{CH}_3$ ) ppm;  $^{13}\text{C}$  NMR (100 MHz,  $\text{CDCl}_3$ ):  $\delta$  166.0, 142.1, 135.8, 133.2, 129.1, 120.8, 80.7, 28.2 ppm; HRMS (ESI,  $m/z$ ): calcd. for  $\text{C}_{13}\text{H}_{16}\text{O}_2\text{H}^+$  239.0839, found 239.0832.

**(E)-tert-butyl 3-(4-bromophenyl)acrylate (3f):** This is compound was prepared by the

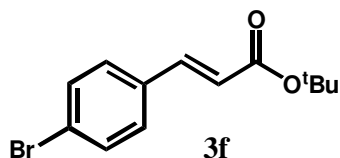

general procedure described above and was obtained as a white solid in 81% yield:  $R_f$  = 0.74 (hexane : ethyl acetate = 7:1); Mp = 64.8-65.9 °C;  $^1\text{H}$  NMR (400 MHz,  $\text{CDCl}_3$ ):  $\delta$  7.50 (d, 1H,  $J$  =

16.0 Hz, CH), 7.49 (d, 2H,  $J$  = 8.0 Hz, ArH), 7.35 (d, 2H,  $J$  = 8.4 Hz, ArH), 6.34 (d, 1H,  $J$  = 16.0 Hz, CH), 1.52 (s, 9H, 3 $\text{CH}_3$ ) ppm;  $^{13}\text{C}$  NMR (100 MHz,  $\text{CDCl}_3$ ):  $\delta$  166.0, 142.1, 133.6,

132.1, 129.3, 124.1, 120.9, 80.7, 28.2 ppm; HRMS (ESI, m/z): calcd. for  $C_{13}H_{15}O_2Na^+$  305.0153, found 305.0148.

**(E)-tert-butyl 3-(4-iodophenyl)acrylate (3g):** This is compound was prepared by the

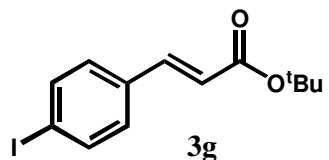

general procedure described above and was obtained as a yellow

solid in 80% yield:  $R_f$  = 0.74 (hexane : ethyl acetate = 7:1); Mp = 66.2-67.4 °C;  $^1H$  NMR (400 MHz,  $CDCl_3$ ):  $\delta$  7.70 (d, 2H,  $J$  = 8.0 Hz, ArH), 7.48 (d, 1H,  $J$  = 16.0 Hz, CH), 7.22 (d, 2H,  $J$  = 8.4 Hz, ArH), 6.36 (d, 1H,  $J$  = 16.0 Hz, CH), 1.52 (s, 9H, 3CH<sub>3</sub>) ppm;  $^{13}C$  NMR (100 MHz,  $CDCl_3$ ):  $\delta$  166.0, 142.3, 138.0, 134.2, 129.4, 121.0, 96.1, 80.7, 28.2 ppm; HRMS (ESI, m/z): calcd. for  $C_{13}H_{15}O_2INa^+$  353.0015, found 353.0020.

**(E)-tert-butyl 3-(4-cyanophenyl)acrylate (3h):** This is compound was prepared by the

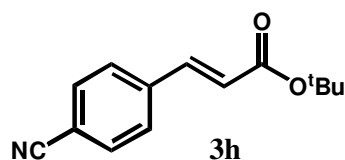

general procedure described above and was obtained as a

white solid in 93% yield:  $R_f$  = 0.62 (hexane : ethyl acetate = 7:1); Mp = 154.8-155.9 °C;  $^1H$  NMR (400 MHz,  $CDCl_3$ ):  $\delta$  7.65 (d, 2H,  $J$  = 8.0 Hz, ArH), 7.58 (d, 2H,  $J$  = 8.4 Hz, ArH), 7.55 (d, 1H,  $J$  = 16.0 Hz, CH), 6.44 (d, 1H,  $J$  = 16.0 Hz, CH), 1.53 (s, 9H, 3CH<sub>3</sub>) ppm;  $^{13}C$  NMR (100 MHz,  $CDCl_3$ ):  $\delta$  165.4, 141.1, 139.0, 132.6, 128.3, 123.8, 118.4, 113.1, 81.2, 28.1 ppm; HRMS (ESI, m/z): calcd. for  $C_{14}H_{15}NO_2Na^+$  252.1000, found 252.0995.

**(E)-4-(3-tert-butoxy-3-oxoprop-1-enyl)benzoic acid (3i):** This is compound was prepared

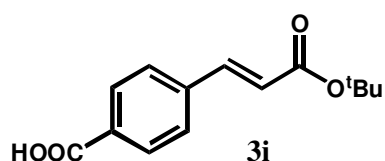

by the general procedure described above and was

obtained as a white solid in 98% yield:  $R_f$  = 0.35 (dichloromethane : ethyl acetate = 3:1);  $^1H$  NMR (400 MHz,  $CDCl_3$ ):  $\delta$  10.96 (b, 1H, COOH), 8.11 (d, 2H,  $J$  = 8.0 Hz, ArH), 7.61 (d, 1H,  $J$  = 16.0 Hz, CH), 7.59 (d, 2H,  $J$  = 8.0 Hz, ArH), 6.73 (d, 1H,  $J$  = 16.0 Hz, CH), 1.54 (s, 9H, 3CH<sub>3</sub>) ppm;  $^{13}C$  NMR (100 MHz,  $CDCl_3$ ):  $\delta$  171.5, 165.8, 142.0, 139.8, 130.7, 130.3, 127.9, 123.0, 81.1, 28.2 ppm; HRMS (ESI, m/z): calcd. for  $C_{14}H_{16}O_4Na^+$  271.0946, found 271.0941

**(E)-tert-butyl(E)-tert-butyl 3-(4-(trifluoromethyl)phenyl)acrylate (3j):** This is compound was prepared by the general procedure described above and was obtained as a yellow oil in 85% yield:  $R_f$  = 0.71 (hexane : ethyl acetate = 7:1);  $^1H$  NMR (400 MHz,  $CDCl_3$ ):  $\delta$  7.57-7.63



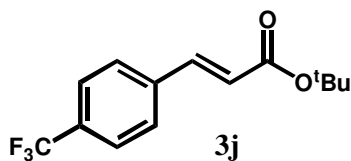

(m, 4H, ArH), 7.59 (d, 1H,  $J = 16.0$  Hz, CH), 6.43 (d, 1H,  $J = 16.0$  Hz, CH), 1.54 (s, 9H, 3CH<sub>3</sub>) ppm; <sup>13</sup>C NMR (100 MHz, CDCl<sub>3</sub>):  $\delta$  165.7, 141.6, 138.1, 131.5 (q,  $J = 32.0$  Hz), 128.0, 125.8 (q,  $J = 4.0$  Hz), 123.9 (q,  $J = 270.0$  Hz), 122.8, 81.0,

28.1 ppm; HRMS (ESI,  $m/z$ ): calcd. for C<sub>14</sub>H<sub>15</sub>O<sub>2</sub>F<sub>3</sub>Na<sup>+</sup> 295.0922, found 295.0927.

**(E)-tert-butyl 3-(4-sulfamoylphenyl)acrylate (3k):** This compound was prepared by the

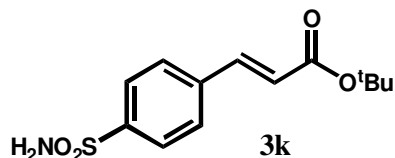

general procedure described above and was obtained as a white solid in 85% yield:  $R_f = 0.46$  (dichloromethane : methanol = 7:1); Mp = 91.8-92.9 °C; <sup>1</sup>H NMR (400 MHz,

DMSO-d<sub>6</sub>):  $\delta$  7.71-7.88 (m, 4H, ArH), 7.58 (d, 1H,  $J = 16.0$  Hz, CH), 7.41 (b, 2H, NH<sub>2</sub>), 6.63 (d, 1H,  $J = 16.0$  Hz, CH), 1.52 (s, 9H, 3CH<sub>3</sub>) ppm; <sup>13</sup>C NMR (100 MHz, DMSO-d<sub>6</sub>):  $\delta$  165.7, 145.5, 142.3, 137.8, 129.1, 126.6, 122.9, 80.8, 28.3 ppm; HRMS (ESI,  $m/z$ ): calcd. for C<sub>13</sub>H<sub>17</sub>NO<sub>4</sub>SN<sup>+</sup> 306.0776, found 306.0782.

**(E)-tert-butyl 3-m-tolylacrylate (3l):** This compound was prepared by the general procedure

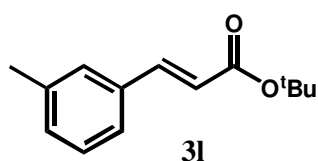

described above and was obtained as a yellow oil in 93% yield:  $R_f = 0.74$  (hexane : ethyl acetate = 7:1); <sup>1</sup>H NMR (400 MHz, CDCl<sub>3</sub>):  $\delta$  7.56 (d, 1H,  $J = 16.0$  Hz, CH), 7.29-7.31 (m, 2H,

ArH), 7.23-7.27 (m, 1H, ArH), 7.16 (d, 1H,  $J = 7.3$  Hz, ArH), 6.35 (d, 1H,  $J = 16.0$  Hz, CH), 2.35 (s, 3H, CH<sub>3</sub>), 1.53 (s, 9H, 3CH<sub>3</sub>) ppm; <sup>13</sup>C NMR (100 MHz, CDCl<sub>3</sub>):  $\delta$  166.4, 143.7, 138.4, 134.6, 130.8, 128.7, 128.6, 125.2, 120.0, 80.4, 28.2, 21.3 ppm; HRMS (ESI,  $m/z$ ): calcd. for C<sub>14</sub>H<sub>18</sub>O<sub>2</sub>Na<sup>+</sup> 241.1204, found 241.1202.

**(E)-tert-butyl 3-(3-bromophenyl)acrylate (3m):** This compound was prepared by the

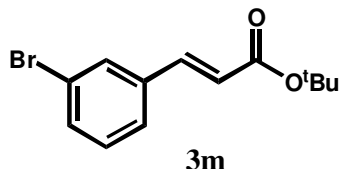

general procedure described above and was obtained as a yellow oil in 93% yield:  $R_f = 0.72$  (hexane : ethyl acetate = 7:1); <sup>1</sup>H NMR (400 MHz, CDCl<sub>3</sub>):  $\delta$  7.65 (s, 1H, ArH), 7.49 (d,

1H,  $J = 16.0$  Hz, CH), 7.47-7.48 (m, 1H, ArH), 7.41 (d, 1H,  $J = 7.7$  Hz, ArH), 7.21-7.25 (m, 1H, ArH), 6.36 (d, 1H,  $J = 16.0$  Hz, CH), 1.53 (s, 9H, 3CH<sub>3</sub>) ppm; <sup>13</sup>C NMR (100 MHz, CDCl<sub>3</sub>):  $\delta$  165.8, 141.8, 136.8, 132.7, 130.6, 130.3, 126.6, 123.0, 121.7, 80.8, 28.2 ppm; HRMS (ESI,  $m/z$ ): calcd. for C<sub>13</sub>H<sub>15</sub>O<sub>2</sub>BrNa<sup>+</sup> 305.0153, found 305.0155.

**(E)-3-(3-*tert*-butoxy-3-oxoprop-1-enyl)benzoic acid (3n):** This compound was prepared by

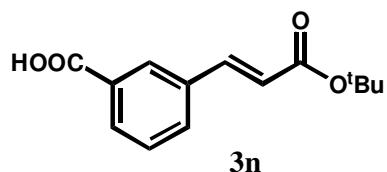

the general procedure described above and was obtained as a white solid in 94% yield:  $R_f$  = 0.38 (dichloromethane :

ethyl acetate = 3:1);  $M_p$  = 159.5-160.7 °C;  $^1H$  NMR (400

MHz,  $CDCl_3$ ):  $\delta$  10.8 (b, 1H, COOH), 8.26 (s, 1H, ArH), 8.10 (d, 1H,  $J$  = 7.8 Hz, ArH), 7.73 (d, 1H,  $J$  = 7.7 Hz, ArH), 7.63 (d, 1H,  $J$  = 16.0 Hz, CH), 7.49 (t, 1H,  $J$  = 7.7 Hz, ArH), 6.47 (d, 1H,  $J$  = 16.0 Hz, CH), 1.54 (s, 9H, 3CH<sub>3</sub>) ppm;  $^{13}C$  NMR (100 MHz,  $CDCl_3$ ):  $\delta$  171.5, 166.0, 142.2, 135.2, 132.9, 131.4, 130.1, 129.5, 129.1, 121.7, 80.9, 28.2 ppm; HRMS (ESI,  $m/z$ ): calcd. for  $C_{14}H_{16}O_4Na^+$  271.0946, found 271.0937.

**(E)-*tert*-butyl 3-*o*-tolylacrylate (3o):** This compound was prepared by the general procedure

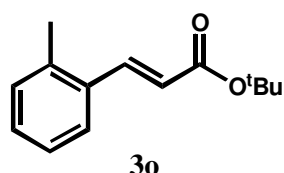

described above and was obtained as a yellow oil in 73% yield:  $R_f$  =

0.71 (hexane : ethyl acetate = 7:1);  $^1H$  NMR (400 MHz,  $CDCl_3$ ):  $\delta$

7.89 (d, 1H,  $J$  = 16.0 Hz, CH), 7.54 (d, 1H,  $J$  = 8.3 Hz, ArH),

7.23-7.25 (m, 1H, ArH), 7.17-7.20 (m, 2H, ArH), 6.29 (d, 1H,  $J$  = 15.9 Hz, CH), 2.43 (s, 3H, CH<sub>3</sub>), 1.54 (s, 9H, 3CH<sub>3</sub>) ppm;  $^{13}C$  NMR (100 MHz,  $CDCl_3$ ):  $\delta$  166.5, 141.3, 137.5, 133.6, 130.7, 129.7, 126.4, 126.3, 121.1, 80.5, 28.2, 19.8 ppm; HRMS (ESI,  $m/z$ ): calcd. for  $C_{14}H_{18}O_2Na^+$  241.1204, found 241.1201.

**(E)-*tert*-butyl 3-(2-nitrophenyl)acrylate (3p):** This compound was prepared by the general

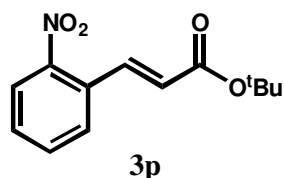

procedure described above and was obtained as a yellow oil in 75%

yield:  $R_f$  = 0.65 (hexane : ethyl acetate = 7:1);  $^1H$  NMR (400 MHz,

$CDCl_3$ ):  $\delta$  8.00 (d, 1H,  $J$  = 16.0 Hz, CH), 7.99-8.00 (m, 1H, ArH),

7.62-7.63 (m, 2H, ArH), 7.49-7.53 (m, 1H, ArH), 6.29 (d, 1H,  $J$  = 15.9 Hz, CH), 1.53 (s, 9H, 3CH<sub>3</sub>) ppm;  $^{13}C$  NMR (100 MHz,  $CDCl_3$ ):  $\delta$  165.1, 148.4, 138.7, 133.4, 130.8, 130.0, 129.1, 125.3, 124.9, 81.2, 28.1 ppm; HRMS (ESI,  $m/z$ ): calcd. for  $C_{13}H_{15}NO_4Na^+$  272.0899, found 272.0896.

**(E)-*tert*-butyl 3-(3,4-dimethoxyphenyl)acrylate (3q):** This compound was prepared by the

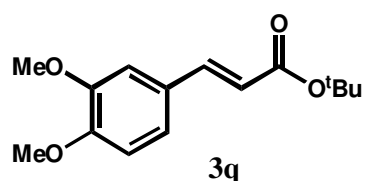

general procedure described above and was obtained as a

yellow oil in 88% yield:  $R_f$  = 0.61 (hexane : ethyl acetate =

7:1);  $^1H$  NMR (400 MHz,  $CDCl_3$ ):  $\delta$  7.54 (d, 1H,  $J$  = 16.0

Hz, CH), 7.27 (s, 1H, ArH), 7.24 (d, 1H,  $J = 6.7$  Hz, ArH), 7.11 (d, 1H,  $J = 7.8$  Hz, ArH), 6.31 (d, 1H,  $J = 15.9$  Hz, CH), 2.26 (s, 6H, 2OCH<sub>3</sub>), 1.54 (s, 9H, 3CH<sub>3</sub>) ppm; <sup>13</sup>C NMR (100 MHz, CDCl<sub>3</sub>):  $\delta$  166.6, 143.7, 139.0, 137.0, 132.4, 130.1, 129.2, 125.6, 118.9, 80.3, 28.2, 19.8, 19.7 ppm; HRMS (ESI,  $m/z$ ): calcd. for C<sub>15</sub>H<sub>20</sub>O<sub>4</sub>Na<sup>+</sup> 287.1259, found 278.1261.

**(*E*)-*tert*-butyl 3-(3-chloro-4-fluorophenyl)acrylate (3r):** This compound was prepared by

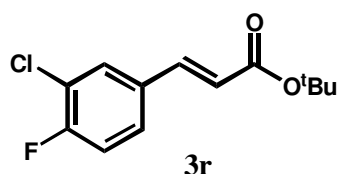

the general procedure described above and was obtained as a yellow oil in 82% yield:  $R_f = 0.68$  (hexane : ethyl acetate = 7:1);

<sup>1</sup>H NMR (400 MHz, CDCl<sub>3</sub>):  $\delta$  7.54 (dd, 1H,  $J = 1.8$  Hz,  $J = 6.9$  Hz, ArH), 7.46 (d, 1H,  $J = 16.0$  Hz, CH), 7.34-7.37 (m, 1H,

ArH), 7.13 (t, 1H,  $J = 8.6$  Hz, ArH), 6.29 (d, 1H,  $J = 16.0$  Hz, CH), 1.52 (s, 9H, 3CH<sub>3</sub>) ppm; <sup>13</sup>C NMR (100 MHz, CDCl<sub>3</sub>):  $\delta$  165.7, 158.9 (d,  $J = 252.9$  Hz), 140.9, 132.1 (d,  $J = 4.2$  Hz), 129.9, 127.8 (d,  $J = 7.4$  Hz), 121.7 (d,  $J = 18.3$  Hz), 121.4 (d,  $J = 2.2$  Hz), 117.0 (d,  $J = 21.6$  Hz), 80.9, 28.2 ppm; HRMS (ESI,  $m/z$ ): calcd. for C<sub>13</sub>H<sub>14</sub>O<sub>2</sub>ClFNa<sup>+</sup> 279.0564, found 279.0566.

**(*E*)-*tert*-butyl 3-(3,5-dichlorophenyl)acrylate (3s):** This compound was prepared by the

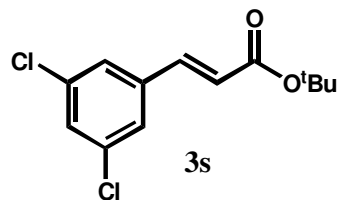

general procedure described above and was obtained as a white solid in 85% yield:  $R_f = 0.67$  (hexane : ethyl acetate = 7:1); Mp

= 53.6-54.5 °C; <sup>1</sup>H NMR (400 MHz, CDCl<sub>3</sub>):  $\delta$  7.42 (d, 1H,  $J = 16.0$  Hz, CH), 7.347 (s, 1H, ArH), 7.349 (s, 1H, ArH), 7.32 (s,

1H, ArH), 6.35 (d, 1H,  $J = 16.0$  Hz, CH), 1.52 (s, 9H, 3CH<sub>3</sub>) ppm; <sup>13</sup>C NMR (100 MHz, CDCl<sub>3</sub>):  $\delta$  165.4, 140.4, 137.7, 135.5, 129.5, 126.1, 123.1, 81.1, 28.1 ppm; HRMS (ESI,  $m/z$ ): calcd. for C<sub>13</sub>H<sub>14</sub>O<sub>2</sub>Cl<sub>2</sub>Na<sup>+</sup> 295.0269, found 295.0272.

**(*E*)-*tert*-butyl 3-(2,5-difluorophenyl)acrylate (3t):** This compound was prepared by the

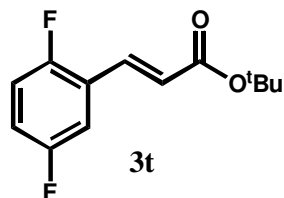

general procedure described above and was obtained as a solid in 73% yield:  $R_f = 0.66$  (hexane : ethyl acetate = 7:1); Mp = 50.1-51.0 °C;

<sup>1</sup>H NMR (400 MHz, CDCl<sub>3</sub>):  $\delta$  7.64 (d, 1H,  $J = 16.0$  Hz, CH), 7.17-7.21 (m, 1H, ArH), 7.01-7.06 (m, 2H, ArH), 6.42 (d, 1H,  $J =$

16.0 Hz, CH), 1.53 (s, 9H, 3CH<sub>3</sub>) ppm; <sup>13</sup>C NMR (100 MHz, CDCl<sub>3</sub>):  $\delta$  165.6, 158.7 (d,  $J = 242.8$  Hz), 157.2 (d,  $J = 249.4$  Hz), 134.8 (t,  $J = 2.3$  Hz), 124.0, 123.9 (d,  $J = 5.8$  Hz), 117.8

(dd,  $J = 8.9$  Hz,  $J = 24.4$  Hz), 117.3 (dd,  $J = 8.6$  Hz,  $J = 25.2$  Hz), 114.5 (dd,  $J = 3.5$  Hz,  $J = 24.5$  Hz), 81.0, 28.1 ppm; HRMS (ESI,  $m/z$ ): calcd. for  $C_{13}H_{14}F_2O_2Na^+$  263.0860, found 263.0870.

**(*E*)-4-(3-butoxy-3-oxoprop-1-enyl)benzoic acid (3u):** This compound was prepared by

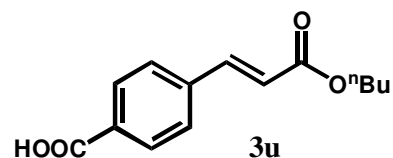

the general procedure described above and was obtained as a white solid in 97% yield:  $R_f = 0.35$  (dichloromethane : ethyl acetate = 3:1); Mp = 88.6-89.3 °C;  $^1H$  NMR (400 MHz, DMSO- $d_6$ ):  $\delta$  7.95 (d, 2H,  $J = 8.0$  Hz, ArH), 7.80 (d, 2H,  $J = 8.0$  Hz, ArH), 7.67 (d, 1H,  $J = 15.9$  Hz, CH), 6.70 (d, 1H,  $J = 16.0$  Hz, CH), 4.13 (t, 2H,  $J = 6.5$  Hz, OCH<sub>2</sub>), 1.58-1.61 (m, 2H, CH<sub>2</sub>), 1.32-1.38 (m, 2H, CH<sub>2</sub>), 0.88 (t, 3H,  $J = 7.3$  Hz, CH<sub>3</sub>) ppm;  $^{13}C$  NMR (100 MHz, DMSO- $d_6$ ):  $\delta$  166.8, 166.0, 143.1, 138.1, 132.1, 129.7, 128.4, 120.4, 63.9, 30.3, 18.7, 13.6 ppm; HRMS (ESI,  $m/z$ ): calcd. for  $C_{14}H_{16}O_4Na^+$  271.0946, found 271.0940

**(*E*)-4-(3-ethoxy-3-oxoprop-1-enyl)benzoic acid (3v):** This compound was prepared by the

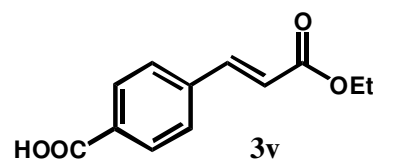

the general procedure described above and was obtained as a white solid in 96% yield:  $R_f = 0.34$  (dichloromethane : ethyl acetate = 3:1); Mp = 109.5-110.2 °C;  $^1H$  NMR (400 MHz, DMSO- $d_6$ ):  $\delta$  7.95 (d, 2H,  $J = 8.0$  Hz, ArH), 7.80 (d, 2H,  $J = 8.0$  Hz, ArH), 7.67 (d, 1H,  $J = 16.0$  Hz, CH), 6.70 (d, 1H,  $J = 16.0$  Hz, CH), 4.18 (q, 2H,  $J = 7.1$  Hz, OCH<sub>2</sub>), 1.25 (t, 3H,  $J = 7.1$  Hz, CH<sub>3</sub>) ppm;  $^{13}C$  NMR (100 MHz, DMSO- $d_6$ ):  $\delta$  166.8, 165.9, 143.1, 138.1, 132.1, 129.7, 128.4, 120.5, 60.2, 14.2 ppm; HRMS (ESI,  $m/z$ ): calcd. for  $C_{12}H_{12}O_4Na^+$  243.0633, found 243.0636

**(*E*)-4-(3-methoxy-3-oxoprop-1-enyl)benzoic acid (3w):** This compound was prepared by

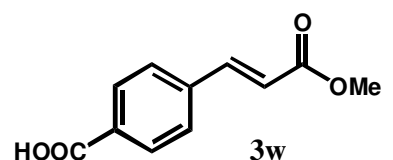

the general procedure described above and was obtained as a white solid in 98% yield:  $R_f = 0.32$  (dichloromethane : ethyl acetate = 3:1); Mp = 149.6-150.5 °C;  $^1H$  NMR (400 MHz, DMSO- $d_6$ ):  $\delta$  7.95 (d, 2H,  $J = 8.0$  Hz, ArH), 7.80 (d, 2H,  $J = 8.0$  Hz, ArH), 7.68 (d, 1H,  $J = 15.8$  Hz, CH), 6.71 (d, 1H,  $J = 16.0$  Hz, CH), 3.73 (s, 3H, OCH<sub>3</sub>) ppm;  $^{13}C$  NMR (100 MHz, DMSO- $d_6$ ):  $\delta$  166.8, 166.4, 143.2, 138.1, 132.1, 129.7, 128.4, 120.1, 51.6 ppm; HRMS (ESI,  $m/z$ ): calcd. for  $C_{11}H_{10}O_4Na^+$  229.0477, found 229.0477

**(E)-butyl 3-p-tolylacrylate (3x):** This compound was prepared by the general procedure

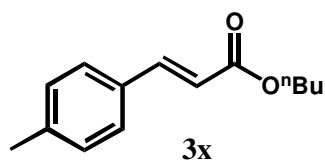

described above and was obtained as a yellow oil in 89% yield:  $R_f$

= 0.69 (hexane : ethyl acetate = 7:1);  $^1\text{H}$  NMR (400 MHz,  $\text{CDCl}_3$ ):

$\delta$  7.66 (d, 1H,  $J$  = 15.9 Hz, CH), 7.42 (d, 2H,  $J$  = 8.0 Hz, ArH),

7.18 (d, 2H,  $J$  = 8.0 Hz, ArH), 6.40 (d, 1H,  $J$  = 16.0 Hz, CH), 4.20 (t, 2H,  $J$  = 6.7 Hz,  $\text{OCH}_2$ ),

2.37 (s, 3H,  $\text{CH}_3$ ), 1.67-1.72 (m, 2H,  $\text{CH}_2$ ), 1.41-1.47 (m, 2H,  $\text{CH}_2$ ), 0.97 (t, 3H,  $J$  = 7.4 Hz,

$\text{CH}_3$ ) ppm;  $^{13}\text{C}$  NMR (100 MHz,  $\text{CDCl}_3$ ):  $\delta$  167.3, 144.6, 140.6, 131.8, 129.6, 128.1, 117.2,

64.3, 30.8, 21.4, 19.2, 13.8 ppm; HRMS (ESI,  $m/z$ ): calcd. for  $\text{C}_{14}\text{H}_{18}\text{O}_2\text{Na}^+$  241.1204, found

241.1202

**(E)-ethyl 3-p-tolylacrylate (3y):** This compound was prepared by the general procedure

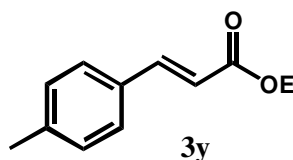

described above and was obtained as a yellow oil in 86% yield:  $R_f$

= 0.68 (hexane : ethyl acetate = 7:1);  $^1\text{H}$  NMR (400 MHz,  $\text{CDCl}_3$ ):

$\delta$  7.66 (d, 1H,  $J$  = 15.9 Hz, CH), 7.42 (d, 2H,  $J$  = 8.0 Hz, ArH),

7.18 (d, 2H,  $J$  = 8.0 Hz, ArH), 6.39 (d, 1H,  $J$  = 16.0 Hz, CH), 4.26 (q, 2H,  $J$  = 7.1 Hz,  $\text{OCH}_2$ ),

2.37 (s, 3H,  $\text{CH}_3$ ), 1.33 (t, 3H,  $J$  = 7.1 Hz,  $\text{CH}_3$ ) ppm;  $^{13}\text{C}$  NMR (100 MHz,  $\text{CDCl}_3$ ):  $\delta$  167.2,

144.6, 140.6, 131.8, 129.6, 128.1, 117.2, 60.4, 21.5, 14.4 ppm; HRMS (ESI,  $m/z$ ): calcd. for

$\text{C}_{12}\text{H}_{14}\text{O}_2\text{Na}^+$  213.0891, found 213.0894

**(E)-methyl 3-p-tolylacrylate (3z):** This compound was prepared by the general procedure

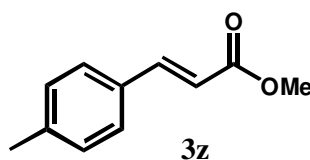

described above and was obtained as a yellow solid in 84% yield:

$R_f$  = 0.63 (hexane : ethyl acetate = 7:1);  $\text{Mp}$  = 53.2-54.1  $^\circ\text{C}$ ;  $^1\text{H}$

NMR (400 MHz,  $\text{CDCl}_3$ ):  $\delta$  7.67 (d, 1H,  $J$  = 16.0 Hz, CH), 7.42

(d, 2H,  $J$  = 8.0 Hz, ArH), 7.19 (d, 2H,  $J$  = 7.6 Hz, ArH), 6.39 (d, 1H,  $J$  = 16.0 Hz, CH), 3.80 (s,

3H,  $\text{OCH}_3$ ), 2.37 (s, 3H,  $\text{CH}_3$ ) ppm;  $^{13}\text{C}$  NMR (100 MHz,  $\text{CDCl}_3$ ):  $\delta$  167.6, 144.9, 140.7,

131.7, 129.6, 128.1, 116.7, 51.6, 21.5 ppm; HRMS (ESI,  $m/z$ ): calcd. for  $\text{C}_{11}\text{H}_{12}\text{O}_2\text{Na}^+$

199.0735, found 199.0732

**(E)-ethyl 3-phenylbut-2-enoate (4):** This compound was prepared by the general

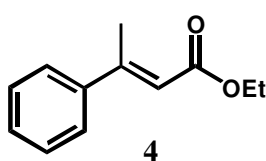

procedure described above and was obtained as a yellow oil in 72%

yield:  $R_f$  = 0.70 (hexane : ethyl acetate = 7:1);  $^1\text{H}$  NMR (400 MHz,

$\text{CDCl}_3$ ):  $\delta$  7.47-7.53 (m, 2H, ArH), 7.36-7.40 (m, 3H, ArH), 6.14 (s,

1H, CH), 4.22 (q, 2H,  $J = 7.2$  Hz, OCH<sub>2</sub>), 2.58 (s, 3H, CH<sub>3</sub>), 1.32 (t, 3H,  $J = 7.2$  Hz, CH<sub>3</sub>) ppm; <sup>13</sup>C NMR (100 MHz, CDCl<sub>3</sub>):  $\delta$  166.8, 155.5, 142.3, 129.0, 128.5, 126.3, 117.2, 59.8, 17.9, 14.4 ppm; HRMS (ESI,  $m/z$ ): calcd. for C<sub>12</sub>H<sub>14</sub>O<sub>2</sub>Na<sup>+</sup> 213.0888, found 213.0891

**(E)-ethyl 3-(4-cyanophenyl)-5-phenylpent-2-enoate (5):** This compound was prepared by the general procedure described above and was obtained as a solid in 45% yield:  $R_f = 0.65$

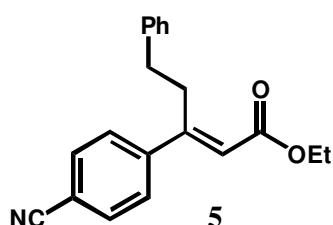

(hexane : ethyl acetate = 7:1); Mp = 51.3-52.5 °C; <sup>1</sup>H NMR (400 MHz, CDCl<sub>3</sub>):  $\delta$  7.66 (d, 2H,  $J = 8.2$  Hz, ArH), 7.49 (d, 2H,  $J = 8.3$  Hz, ArH), 7.23-7.27 (m, 2H, ArH), 7.16-7.18 (m, 3H, ArH), 6.06 (s, 1H, CH), 4.22 (q, 2H,  $J = 7.1$  Hz, OCH<sub>2</sub>), 3.37-3.41 (m, 2H, CH<sub>2</sub>), 2.70-2.74 (m, 2H, CH<sub>2</sub>), 1.31 (t, 3H,  $J = 7.1$  Hz, CH<sub>3</sub>)

ppm; <sup>13</sup>C NMR (100 MHz, CDCl<sub>3</sub>) (major):  $\delta$  165.7, 157.1, 145.9, 140.8, 132.4, 128.4, 128.4, 127.5, 126.2, 120.3, 118.5, 112.5, 60.3, 35.0, 32.9, 14.3 ppm; HRMS (ESI,  $m/z$ ): calcd. for C<sub>22</sub>H<sub>23</sub>NO<sub>2</sub>Na<sup>+</sup> 356.1626, found 356.1624

**N-phenylcinnamamide (6):** This compound was prepared by the general procedure

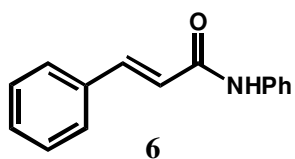

described above and was obtained as a white solid in 78% yield:  $R_f = 0.35$  (hexane : ethyl acetate = 3:1); <sup>1</sup>H NMR (400 MHz, CDCl<sub>3</sub>):  $\delta$  8.35 (b, 1H, NH), 7.72 (d, 1H,  $J = 15.9$  Hz, CH), 7.66-7.68 (m,

2H, ArH), 7.38-7.40 (m, 2H, ArH), 7.24-7.30 (m, 5H, ArH), 7.07-7.11 (m, 1H, ArH), 6.67 (d, 1H,  $J = 15.9$  Hz, CH) ppm; <sup>13</sup>C NMR (100 MHz, CDCl<sub>3</sub>):  $\delta$  164.6, 142.3, 138.2, 134.6, 130.0, 129.1, 128.8, 128.0, 124.5, 121.2, 120.4 ppm; HRMS (ESI,  $m/z$ ): calcd. for C<sub>15</sub>H<sub>13</sub>NONa<sup>+</sup> 246.0895, found 246.0901

**cinnamic acid (7):** This compound was prepared by the general procedure described above

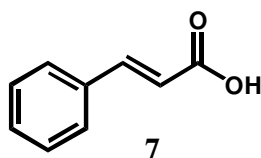

and was obtained as a white solid in 73% yield:  $R_f = 0.38$  (dichloromethane : ethyl acetate = 2:1); <sup>1</sup>H NMR (400 MHz, CDCl<sub>3</sub>):  $\delta$  7.81 (d, 1H,  $J = 15.9$  Hz, CH), 7.42 (d, 2H,  $J = 8.0$  Hz, ArH), 7.18

(d, 2H,  $J = 8.0$  Hz, ArH), 6.39 (d, 1H,  $J = 16.0$  Hz, CH), 4.26 (q, 2H,  $J = 7.1$  Hz, OCH<sub>2</sub>), 2.37 (s, 3H, CH<sub>3</sub>), 1.33 (t, 3H,  $J = 7.1$  Hz, CH<sub>3</sub>) ppm; <sup>13</sup>C NMR (100 MHz, CDCl<sub>3</sub>):  $\delta$  167.2, 144.6, 140.6, 131.8, 129.6, 128.1, 117.2, 60.4, 21.5, 14.4 ppm; HRMS (ESI,  $m/z$ ): calcd. for C<sub>9</sub>H<sub>8</sub>O<sub>2</sub>Na<sup>+</sup> 171.0422, found 171.0424

**(E)-1,2-diphenylethene (8):** This compound was prepared by the general procedure described above and was obtained as a white solid in 93% yield:  $R_f = 0.78$  (hexane : ethyl acetate = 7:1);  $^1\text{H}$  NMR (400 MHz,  $\text{CDCl}_3$ ):  $\delta$  7.55-7.57 (m, 4H, ArH), 7.39-7.42 (m, 4H, ArH), 7.29-7.32 (m, 2H, ArH), 7.16 (s, 2H, CH) ppm;  $^{13}\text{C}$  NMR (100 MHz,  $\text{CDCl}_3$ ):  $\delta$  137.4, 128.8, 128.7, 127.7, 126.6 ppm; HRMS (ESI,  $m/z$ ): calcd. for  $\text{C}_{14}\text{H}_{12}\text{H}^+$  181.1017, found 181.1015

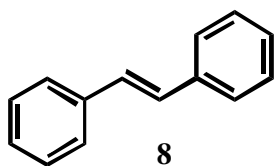

**4-(cyclopent-2-enyl)benzonitrile (9) and 4-cyclopentenylbenzonitrile (10):** This compound was prepared by the general procedure described above and was obtained as a yellow oil in 80% yield:  $R_f = 0.58$  (hexane : ethyl acetate = 7:1) (**9:10** = 80:20);  $^1\text{H}$  NMR (400 MHz,  $\text{CDCl}_3$ ) (**9**):  $\delta$  7.57 (d, 2H,  $J = 8.0$  Hz, ArH), 7.28 (d, 2H,  $J = 8.4$  Hz, ArH), 6.00-6.01 (m, 1H, CH), 5.72-5.74 (m, 1H, CH), 3.93-3.94 (m, 1H, CH), 2.41-2.51 (m, 3H,  $\text{CH}_2$ ), 1.63-1.72 (m, 1H,  $\text{CH}_2$ ) ppm;  $^{13}\text{C}$  NMR (100 MHz,  $\text{CDCl}_3$ ):  $\delta$  152.2, 133.4, 132.8, 132.3, 128.0, 119.2, 109.8, 51.4, 33.6, 32.5 ppm; HRMS (ESI,  $m/z$ ): calcd. for  $\text{C}_{12}\text{H}_{11}\text{NH}^+$  170.0970, found 170.0972;  $^1\text{H}$  NMR (400 MHz,  $\text{CDCl}_3$ ) (**10**):  $\delta$  7.57 (d, 2H,  $J = 8.0$  Hz, ArH), 7.34 (d, 2H,  $J = 8.0$  Hz, ArH), 3.48-3.52 (m, 1H, CH), 2.83-2.89 (m, 2H,  $\text{CH}_2$ ), 2.71-2.73 (m, 1H,  $\text{CH}_2$ ), 2.41-2.51 (m, 2H,  $\text{CH}_2$ ) ppm;  $^{13}\text{C}$  NMR (100 MHz,  $\text{CDCl}_3$ ):  $\delta$  153.3, 132.1, 130.7, 129.7, 127.7, 126.0, 109.6, 43.0, 41.2, 32.9 ppm; HRMS (ESI,  $m/z$ ): calcd. for  $\text{C}_{12}\text{H}_{11}\text{NH}^+$  170.0970, found 170.0972

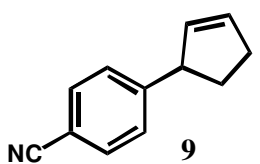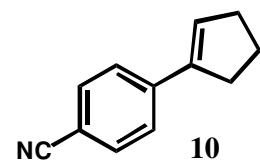

**(E)-4-p-tolylbut-3-enenitrile (11):** This compound was prepared by the general procedure described above and was obtained as a yellow oil in 71% yield:  $R_f = 0.58$  (hexane : ethyl acetate = 7:1);  $^1\text{H}$  NMR (400 MHz,  $\text{CDCl}_3$ ):  $\delta$  7.25 (d, 2H,  $J = 7.9$  Hz, ArH), 7.14 (d, 2H,  $J = 7.8$  Hz, ArH), 6.69 (d, 1H,  $J = 15.8$  Hz, CH), 5.99 (td, 1H,  $J = 5.6$  Hz,  $J = 15.7$  Hz, CH), 3.26 (d, 2H,  $J = 5.5$  Hz,  $\text{CH}_2$ ), 2.34 (s, 3H,  $\text{CH}_3$ ) ppm;  $^{13}\text{C}$  NMR (100 MHz,  $\text{CDCl}_3$ ):  $\delta$  138.3, 134.5, 132.9, 129.4, 126.4, 117.5, 115.7, 21.2, 20.8 ppm; HRMS (ESI,  $m/z$ ): calcd. for  $\text{C}_{11}\text{H}_{11}\text{NH}^+$  158.0970, found 158.0969

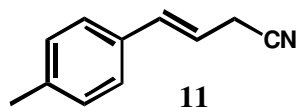

**3-p-tolylbut-3-enenitrile (12):** This compound was prepared by the general procedure described above and was obtained as a yellow oil in 14% yield:  $R_f =$

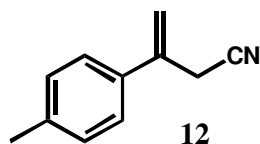

0.63 (hexane : ethyl acetate = 7:1);  $^1\text{H}$  NMR (400 MHz,  $\text{CDCl}_3$ ):  $\delta$  7.29 (d, 2H,  $J = 8.1$  Hz, ArH), 7.18 (d, 2H,  $J = 8.0$  Hz, ArH), 5.60 (s, 1H,  $\text{CH}_2$ ), 5.48 (s, 1H,  $\text{CH}_2$ ), 3.52 (s, 2H,  $\text{CH}_2$ ), 2.36 (s, 3H,  $\text{CH}_3$ ) ppm;  $^{13}\text{C}$  NMR (100 MHz,  $\text{CDCl}_3$ ):  $\delta$  138.6, 136.8, 135.0, 129.4, 125.4, 117.5, 115.2, 23.9, 21.1 ppm; HRMS (ESI,  $m/z$ ): calcd. for  $\text{C}_{11}\text{H}_{11}\text{NH}^+$  158.0970, found 158.0969.

**(2,9-dimethyl-1,10-phenanthroline)- 4-cyanophenyl-palladium(II) chloride (1h')**: This compound was prepared by the general procedure described above and was obtained as a

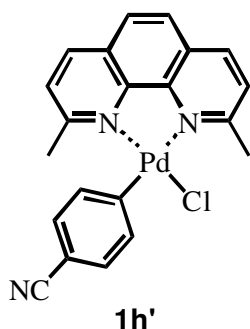

yellow oil in 35% yield:  $^1\text{H}$  NMR (400 MHz,  $\text{CDCl}_3$ ):  $\delta$  8.30 (d, 2H,  $J = 8.4$  Hz, ArH), 7.86 (s, 2H, ArH), 7.55 (b, 2H, ArH), 7.26-7.29 (m, 2H, ArH), 7.15 (d, 2H,  $J = 8.0$  Hz, ArH), 3.27 (b, 3H,  $\text{CH}_3$ ), 2.08 (b, 3H,  $\text{CH}_3$ ) ppm;  $^{13}\text{C}$  NMR (100 MHz,  $\text{CDCl}_3$ ):  $\delta$  164.2, 153.6, 137.8, 136.8, 128.8, 127.6, 126.7, 125.3, 120.1, 106.7, 28.5, 26.7 ppm; HRMS (ESI,  $m/z$ ): calcd. for  $\text{C}_{21}\text{H}_{16}\text{ClN}_3\text{PdH}^+$  452.0146, found

452.0141.



## Mechanistic study by employing ESI-MS:

Figure 1 shows the ESI-MS spectrum of the reaction mixture of cross-coupling between 4-methoxy phenylhydrazine and *tert*-butyl acrylate. The reaction mixture was injected directly to ESI-MS after reaction time of 2 hours. Aryl palladium ion **14** ( $m/z$  573) and **18** ( $m/z$  932) and four palladiaziridine complexes **13** ( $m/z$  497), **15** ( $m/z$  603), **16** ( $m/z$  709) and **17** ( $m/z$  731) could be detected as stable species (Figure 1).

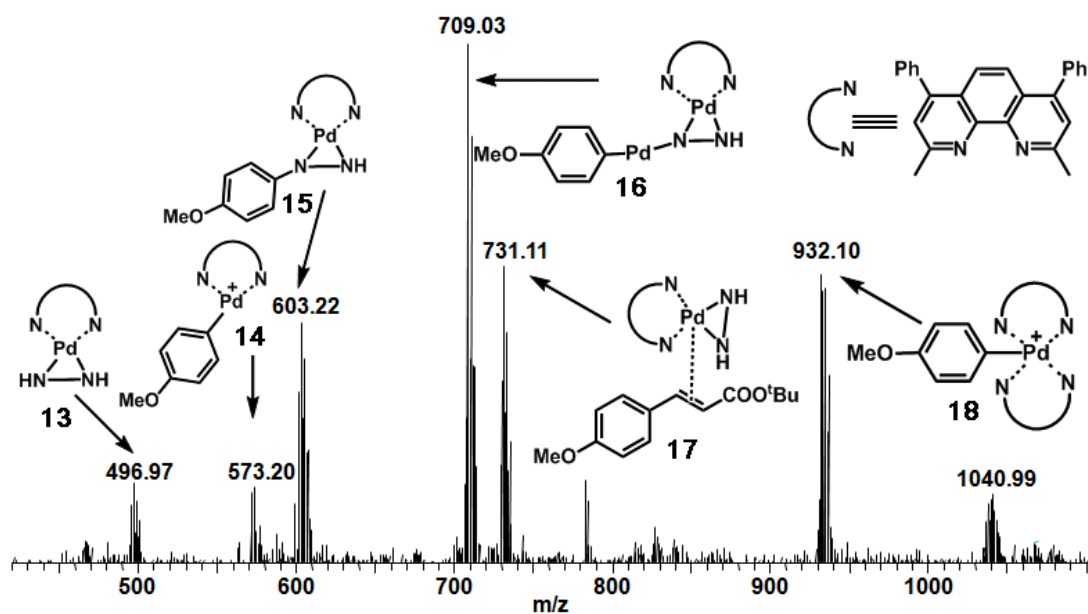

**Figure 1.** ESI(+)-MS spectrum of the reaction mixture of cross-coupling between 4-methoxy phenylhydrazine and *tert*-butyl acrylate.

ZMK-110610-2-2H\_110610141812 #2-6 RT: 0.03-0.13 AV: 5 SB: 77 0.17-1.98 NL: 3.93E9  
T: + c ESI Full ms [ 50.00-2000.00]

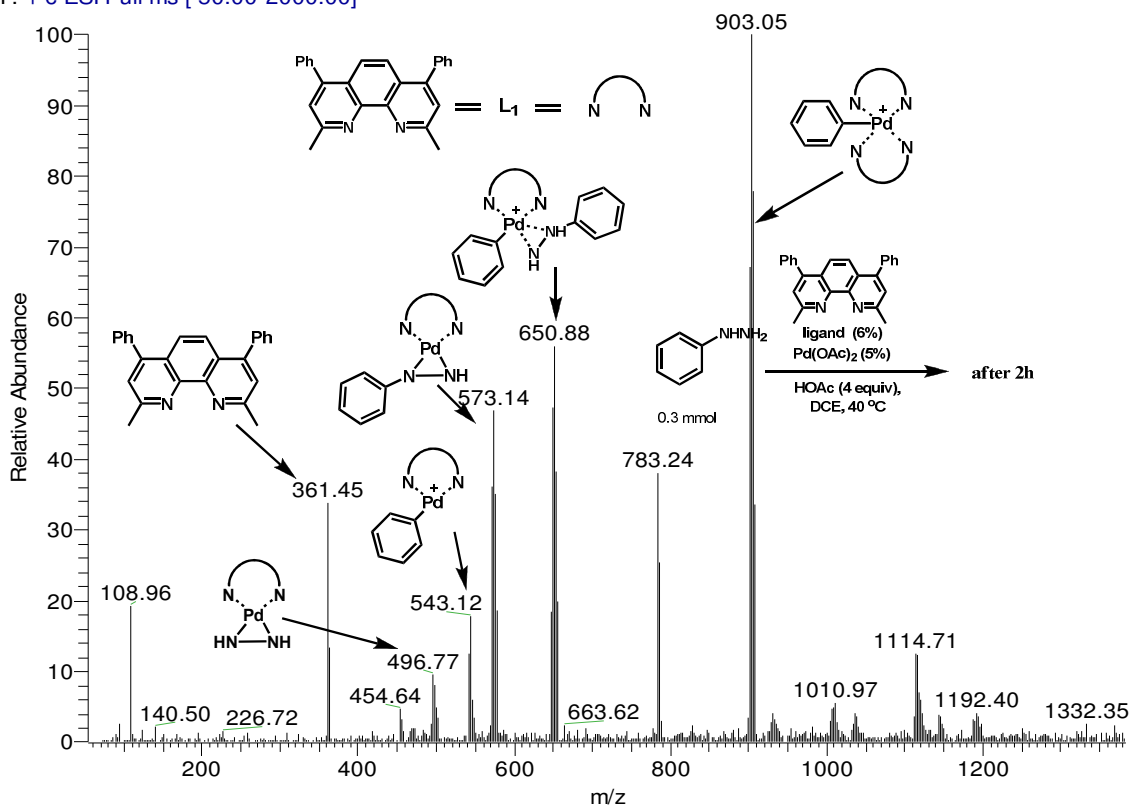

ZMK-110522-2-NO #2-7 RT: 0.03-0.15 AV: 6 SB: 74 0.20-1.94 NL: 4.84E9  
T: + c ESI Full ms [ 50.00-2000.00]

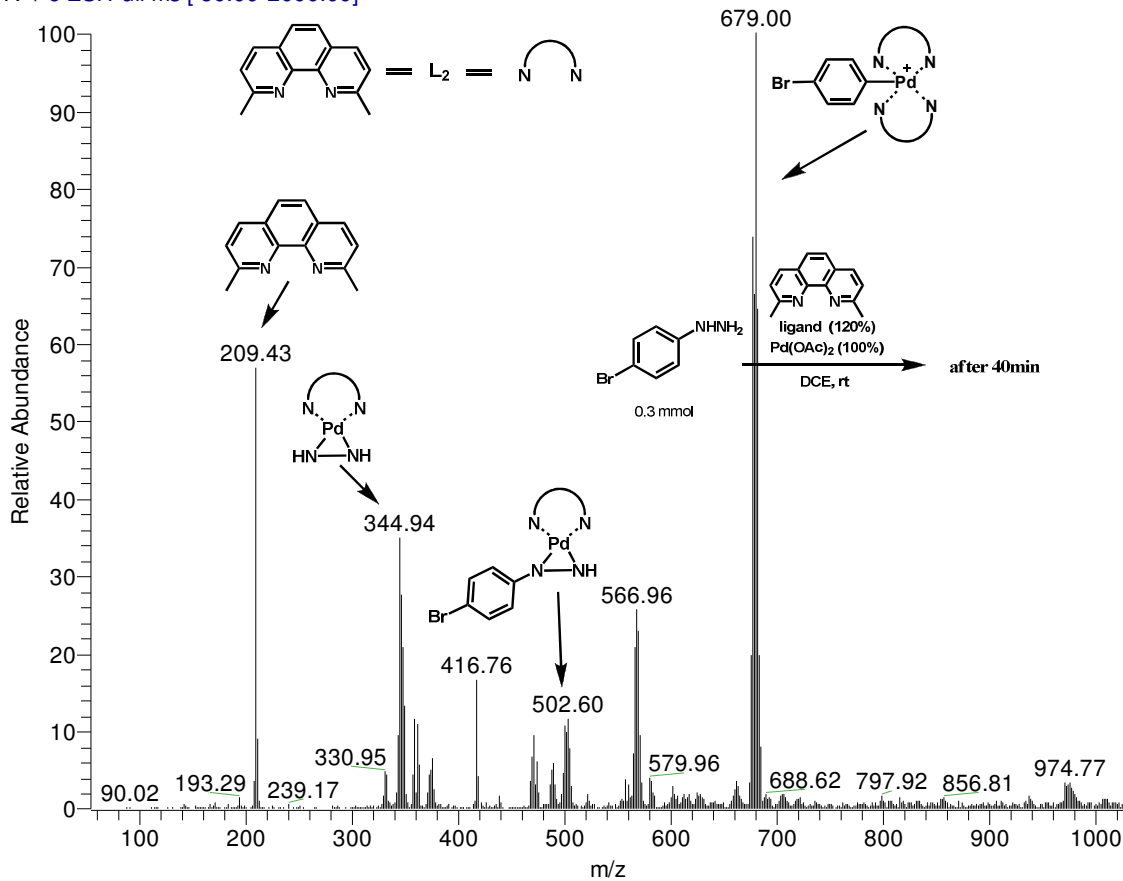

ZMK-110522-1-ACID#1-8 RT: 0.00-0.18 AV: 8 SB: 73 0.27-2.00 NL: 3.98E9  
T: + c ESI Full ms [ 50.00-2000.00]

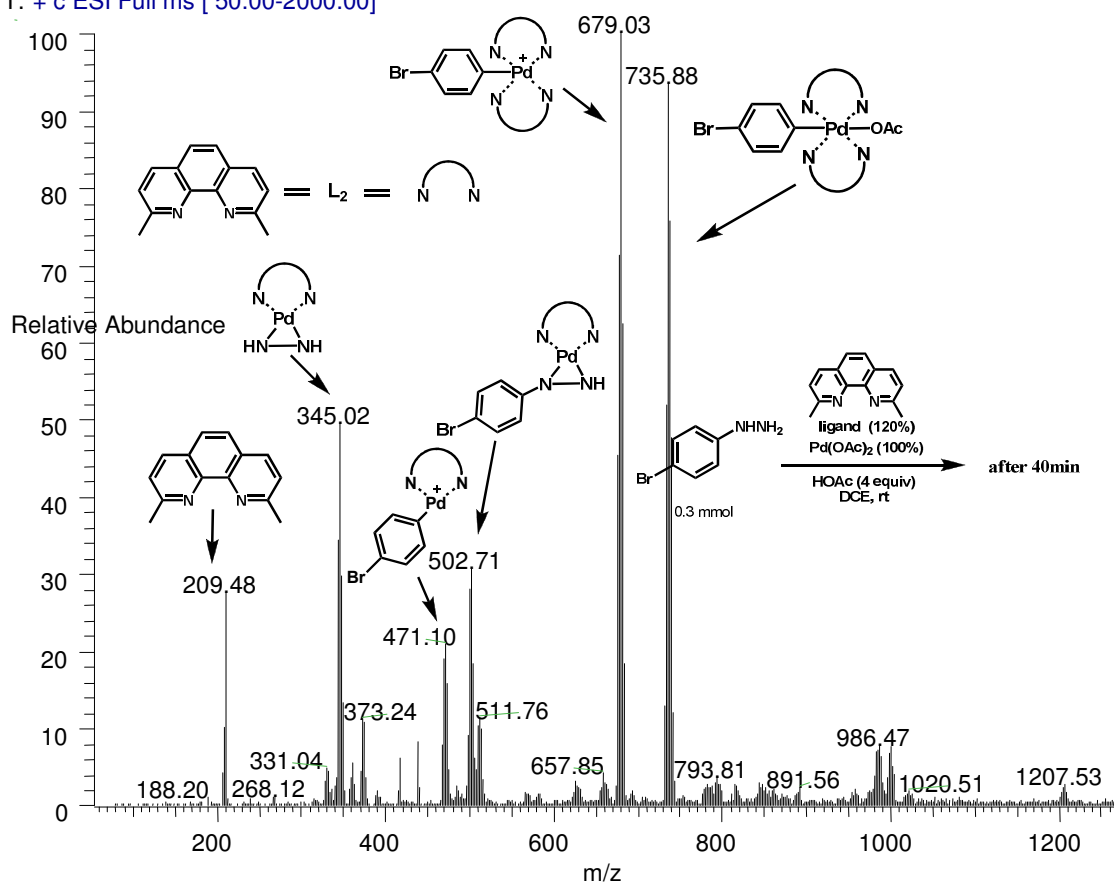

zmk-110510-12-CN #1-5 RT: 0.00-0.10 AV: 5 SB: 76 0.20-1.99 NL: 8.89E9  
T: + c ESI Full ms [ 50.00-2000.00]

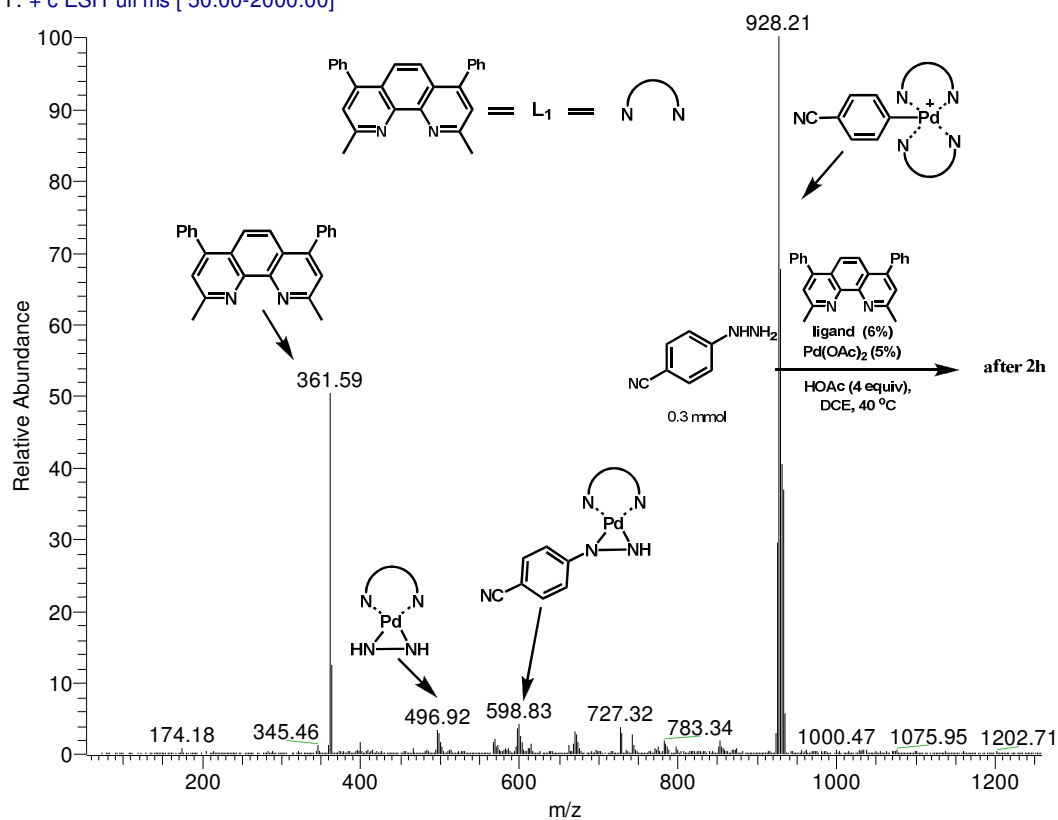

zmk-110609-2-2h\_110609145346 #1-7 RT: 0.01-0.16 AV: 7 SB: 74 0.23-1.96 NL: 7.63E9  
T: + c ESI Full ms [ 50.00-2000.00]

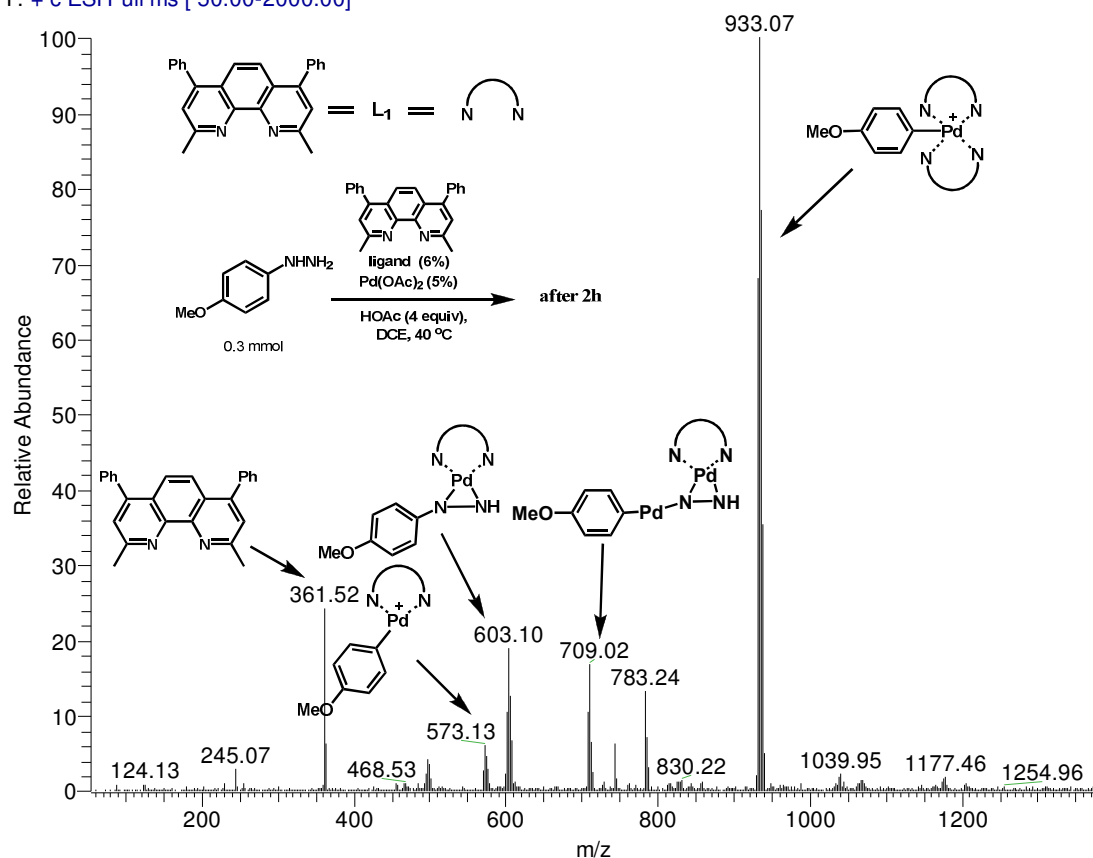

zmk-110609-5-1h\_110609162009 #1-8 RT: 0.01-0.18 AV: 8 SB: 72 0.26-1.95 NL: 6.54E9  
T: + c ESI Full ms [ 50.00-2000.00]

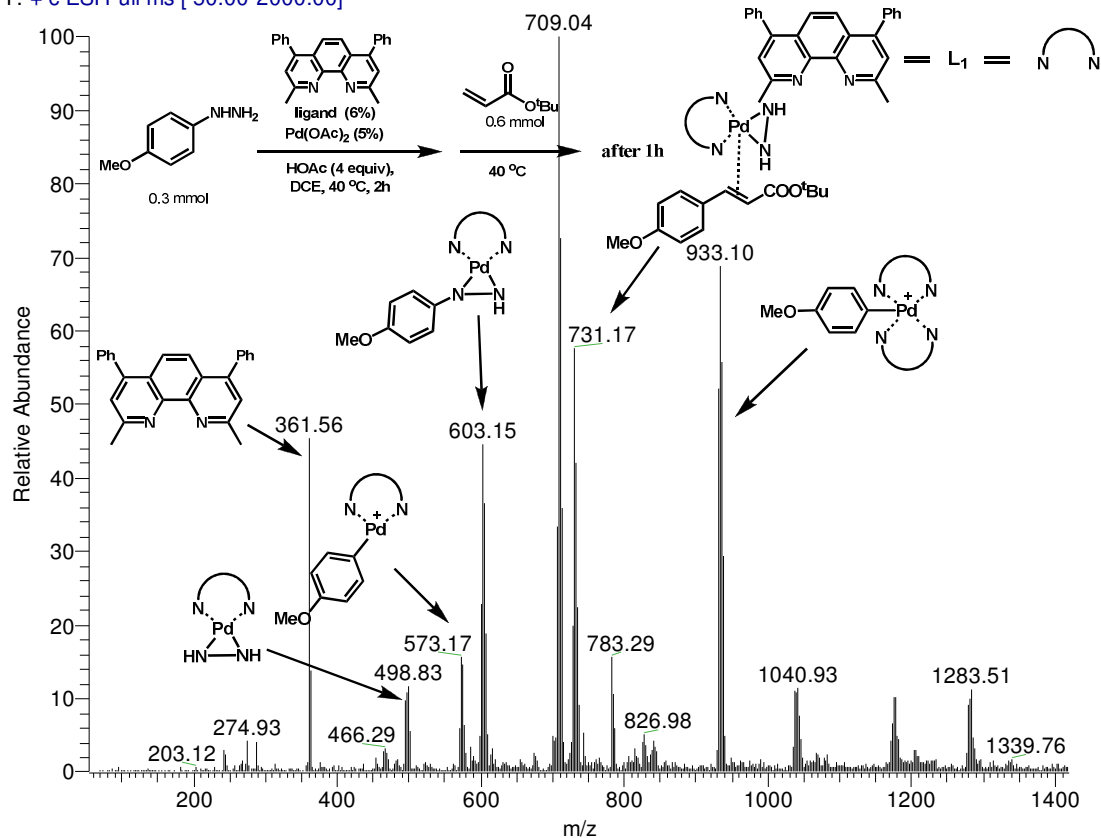

zmk-110609-6-2h\_110609173708 #1-6 RT: 0.01-0.14 AV: 6 SB: 75 0.19-1.95 NL: 3.61E9  
T: + c ESI Full ms [ 50.00-2000.00]

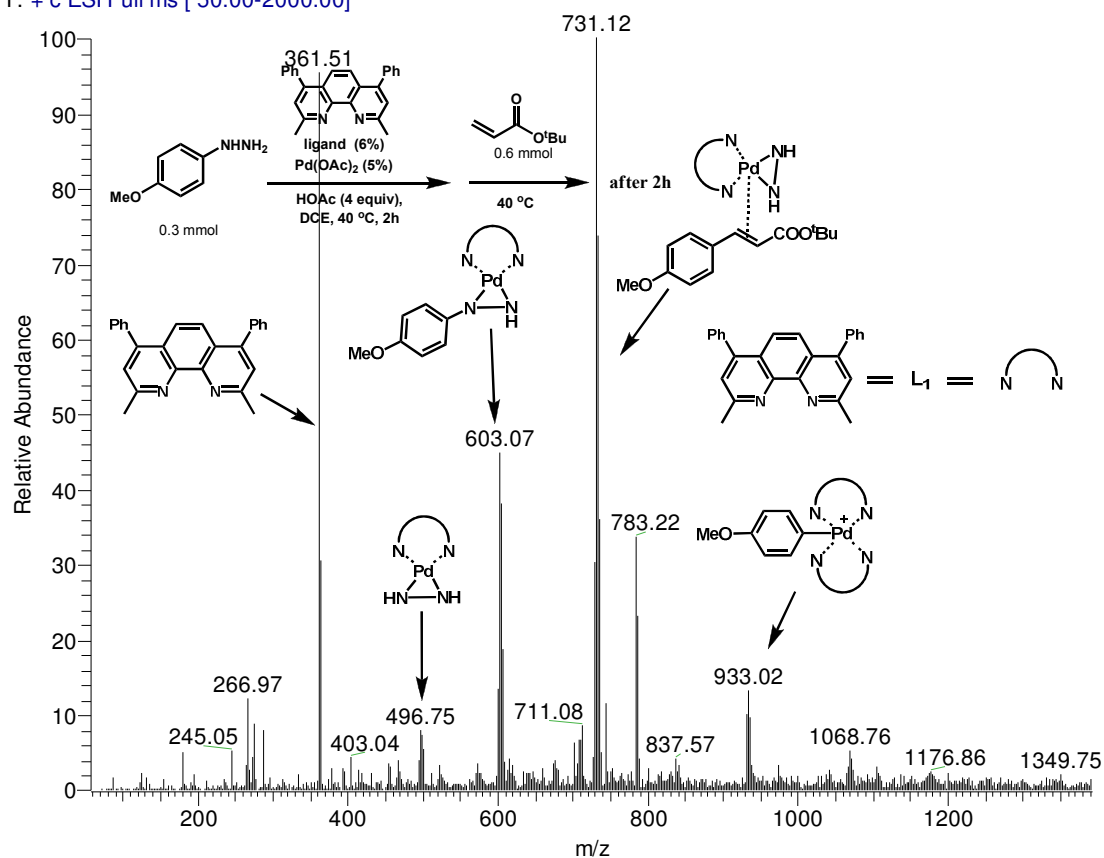

zmk-110609-7-4h\_110609195920 #2-7 RT: 0.03-0.16 AV: 6 SB: 77 0.18-1.99 NL: 9.50E9  
T: + c ESI Full ms [ 50.00-2000.00]

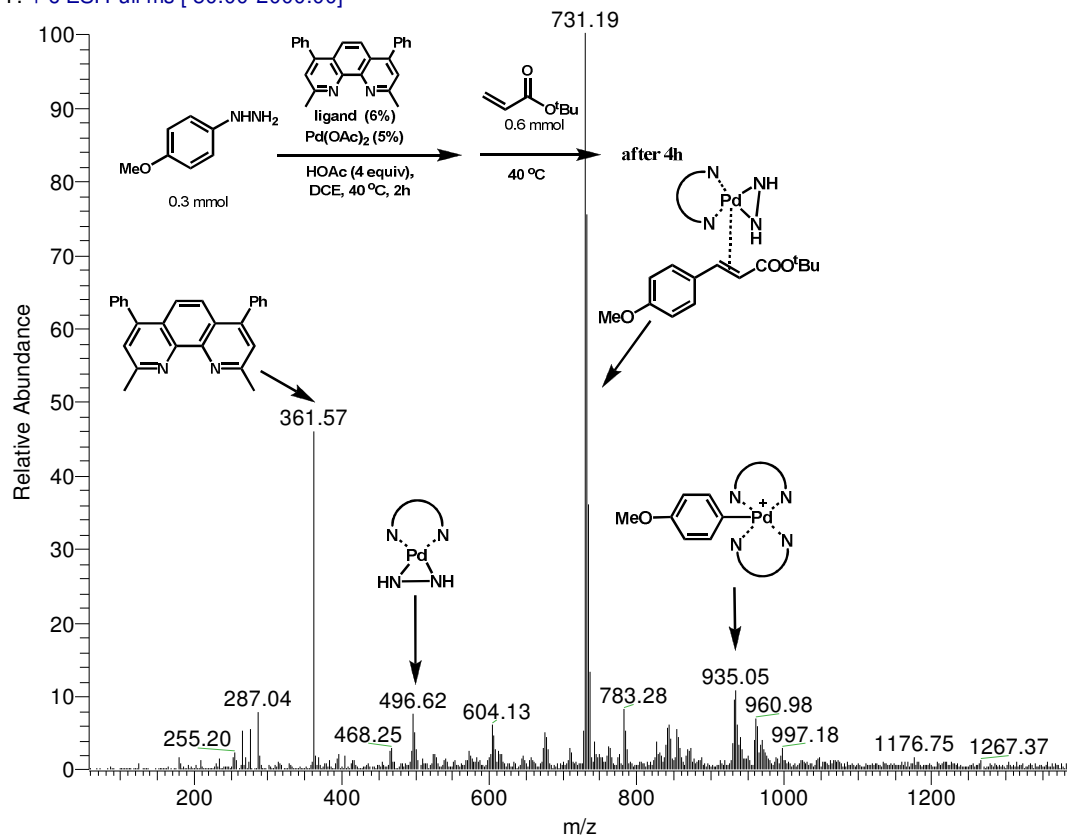

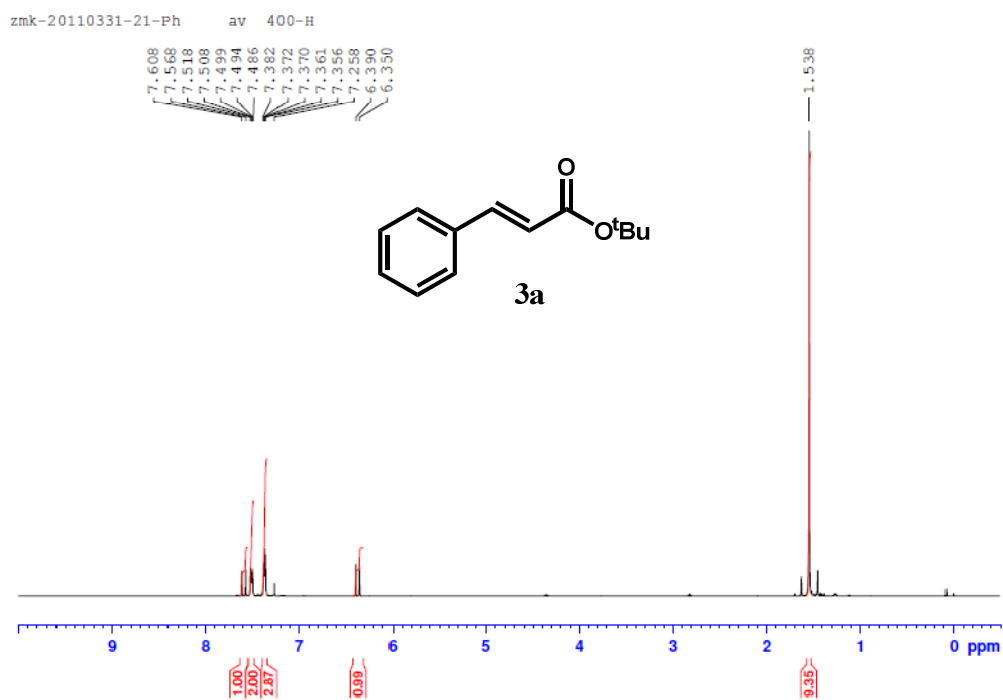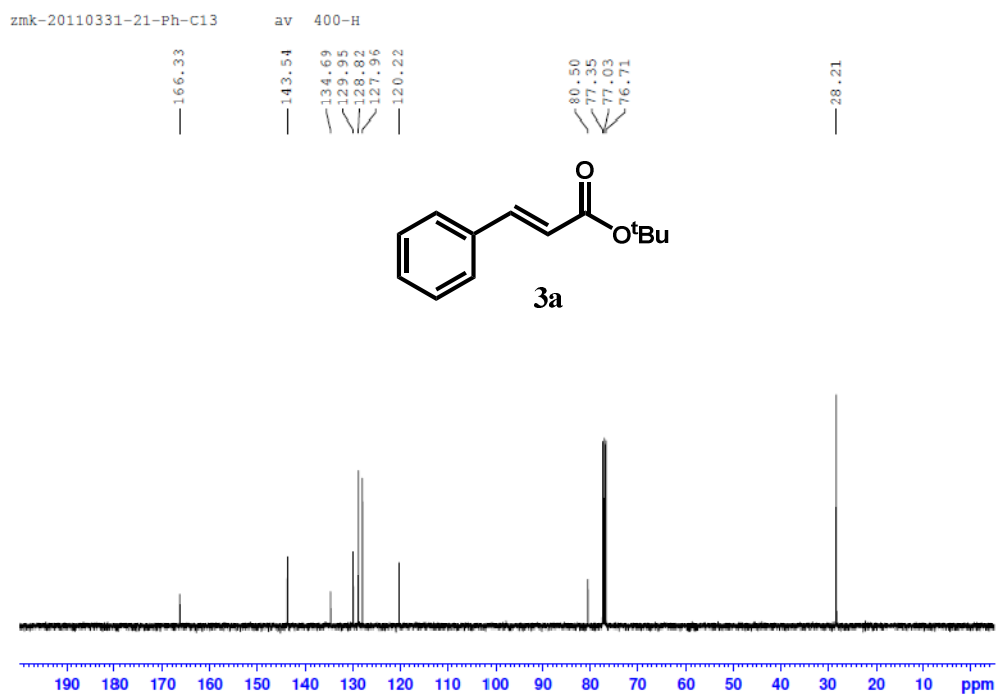

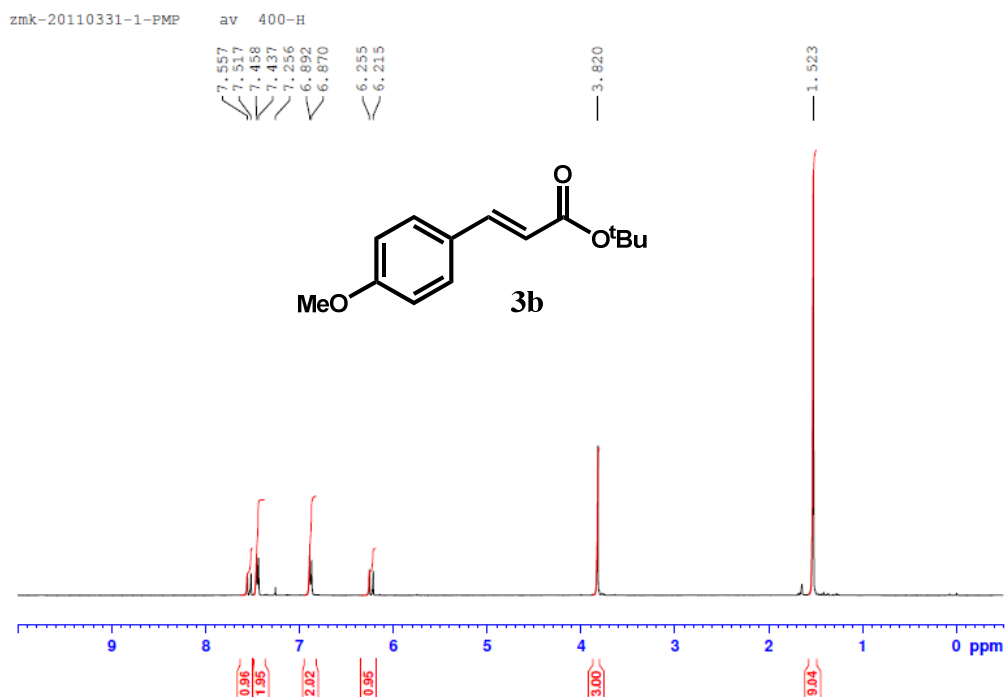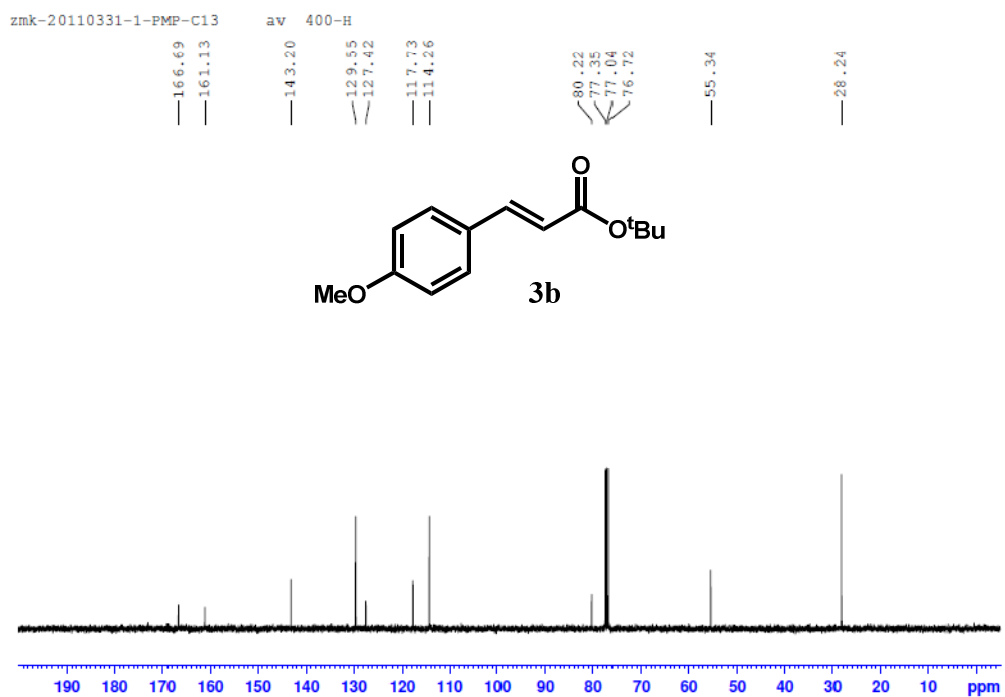

zmk-110410-2-3-Me-H , AV400, Apr 2011

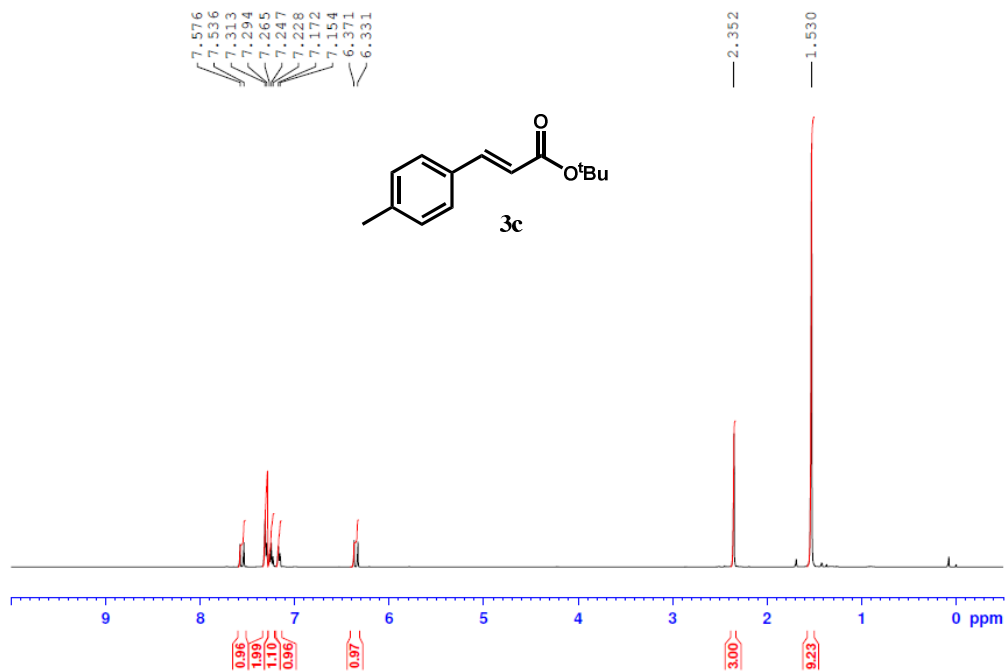

zmk 110410 2 3 Mc C13 , AV400, Apr 2011

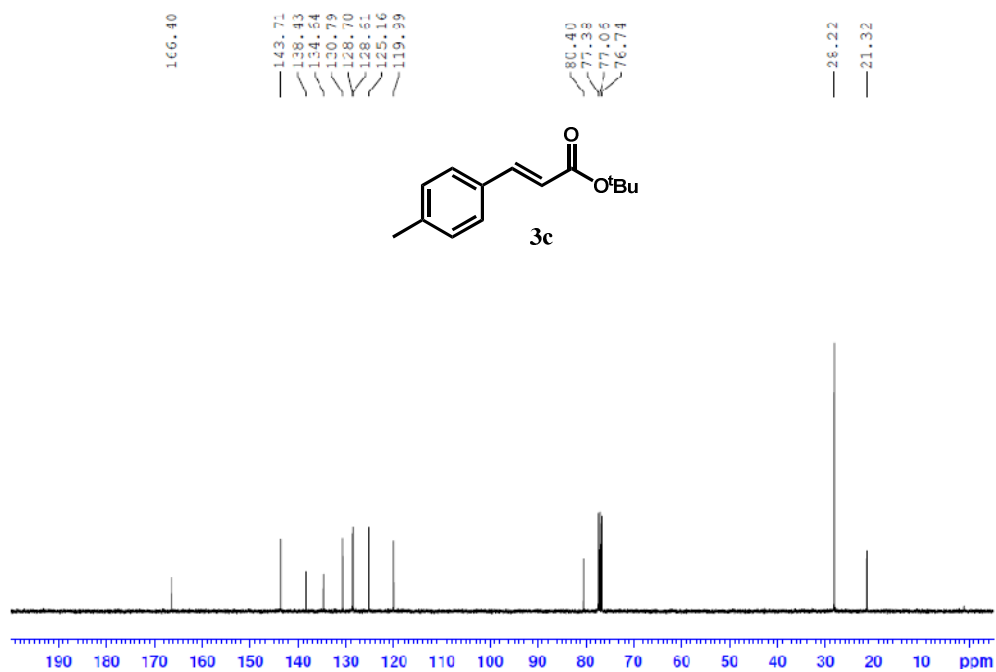



zmk-110409-2-4-F , AV400, Apr 2011

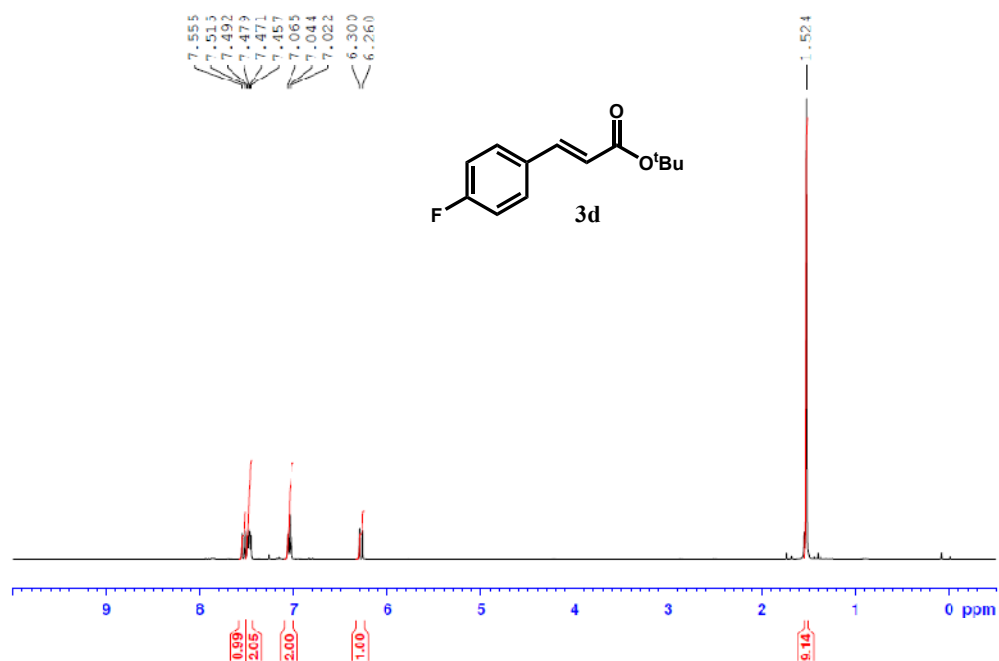

zmk-110409-2-4-F-Cl3 , AV400, Apr 2011

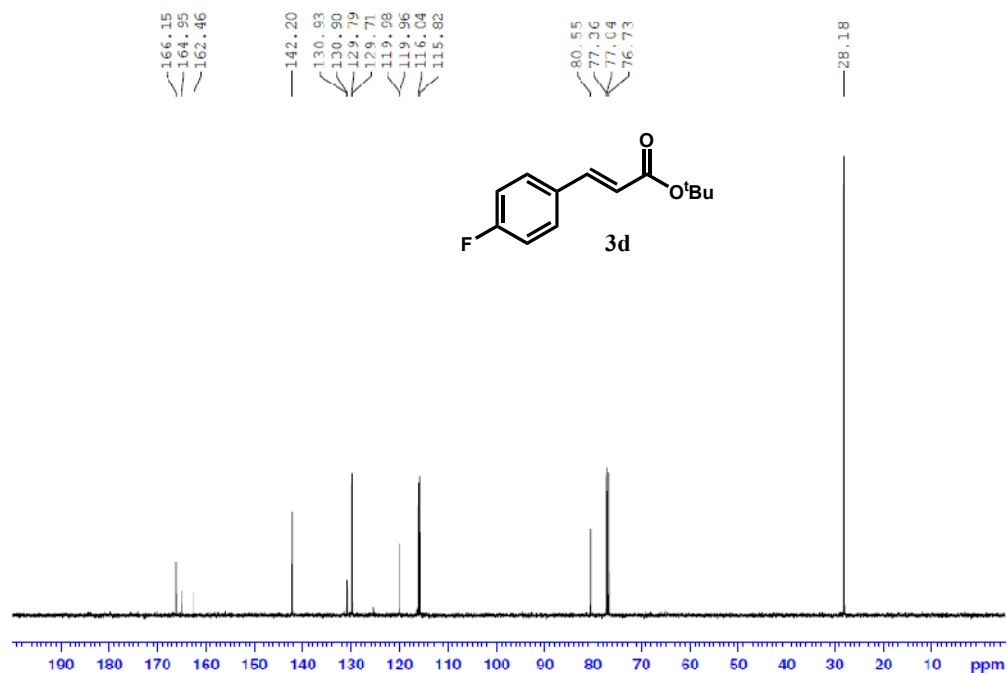

zmk-110409-2-4-Cl-13 1H NMR CDCl3 20110407

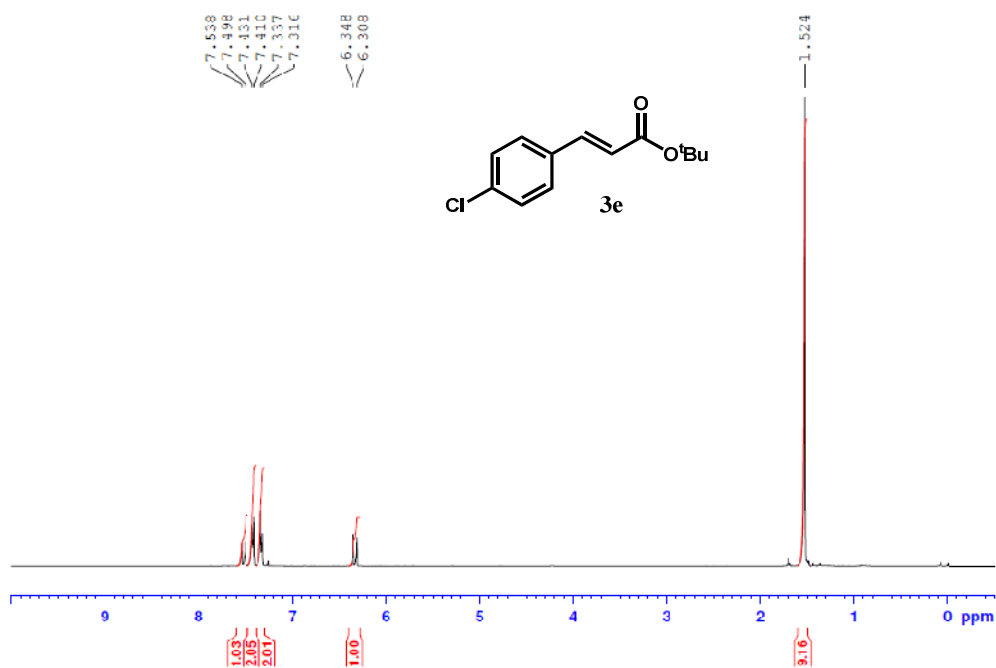

zmk-110409-2-4-Cl-C13 1H NMR CDCl3 20110407

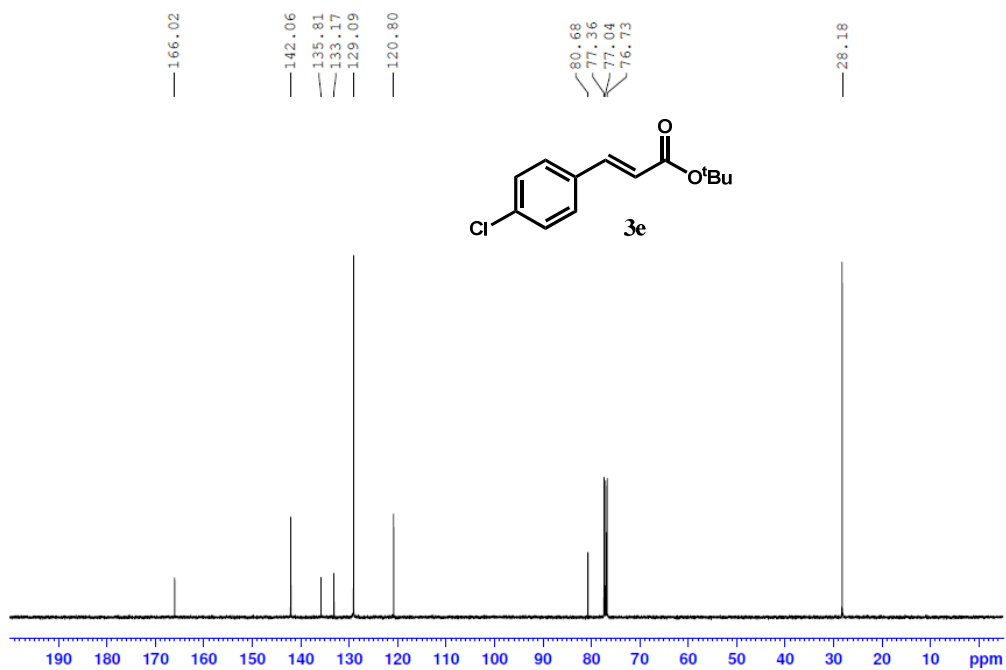

zmk-110504-2-4-Br-cootbu-H, 400 MHz H

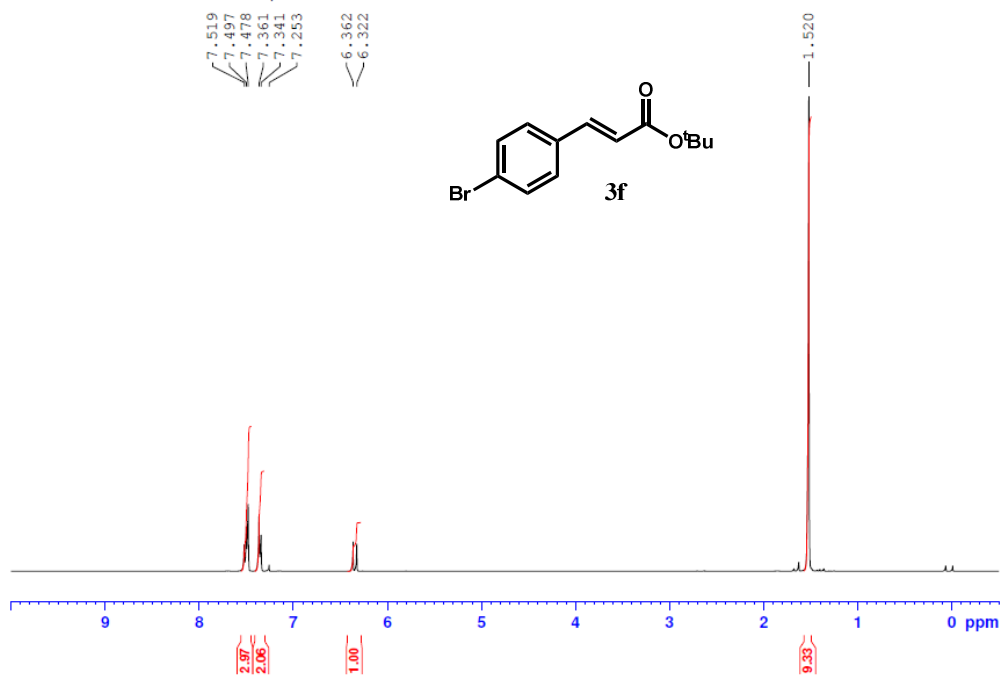

zmk-110504-2-4-Br-cootbu-C13, 400 MHz H

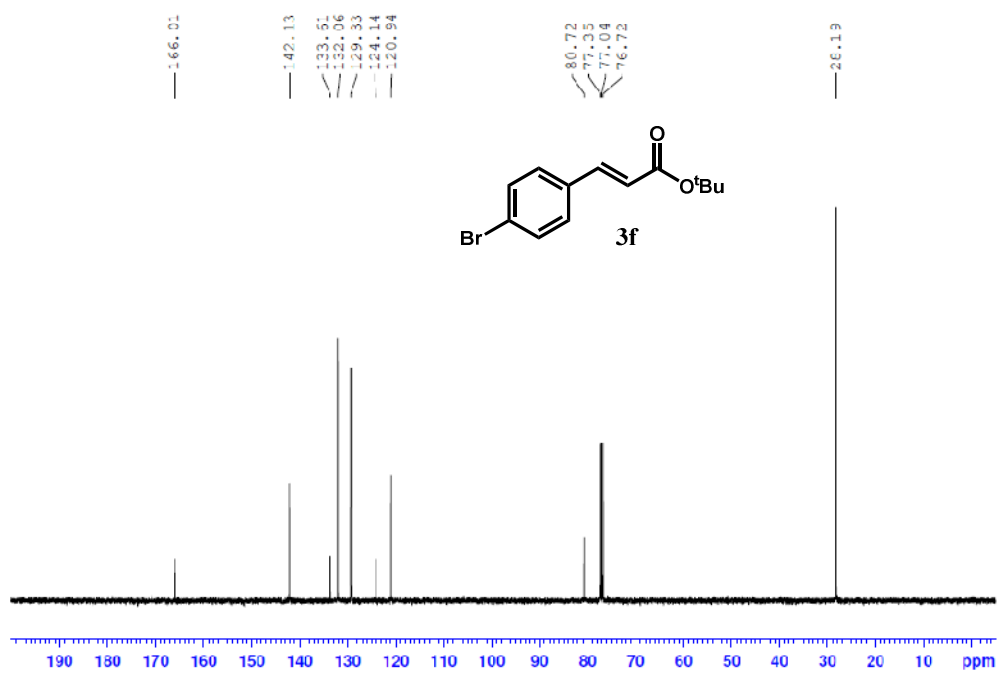

zmk-110429-4-I-tBu-H , AV400, Apr 2011

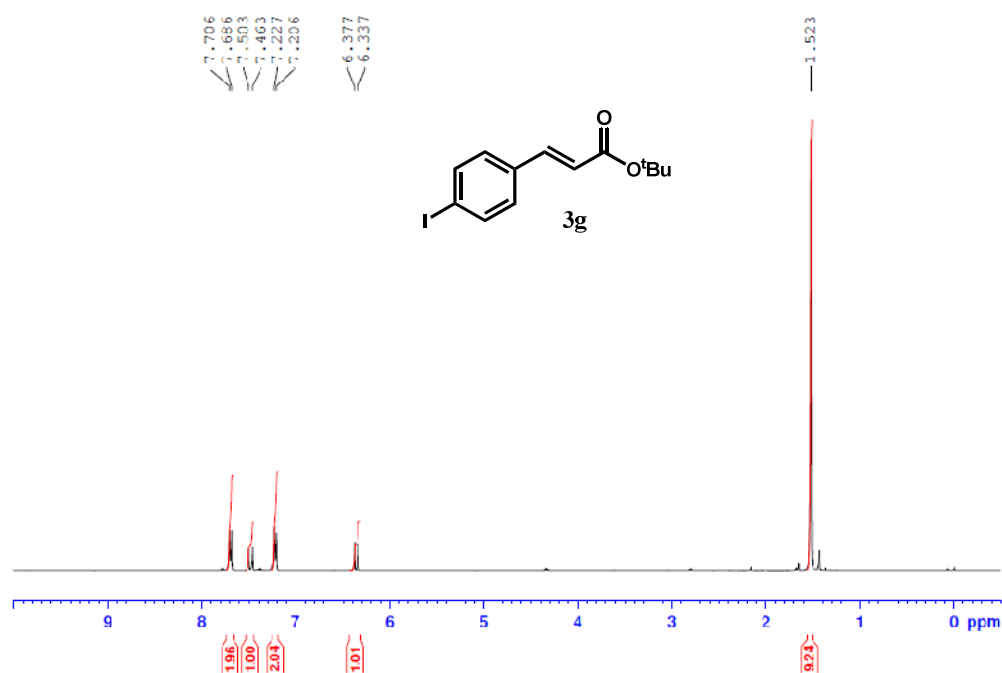

zmk-110429-4-I-tBu-Cl3, AV400, Apr 2011

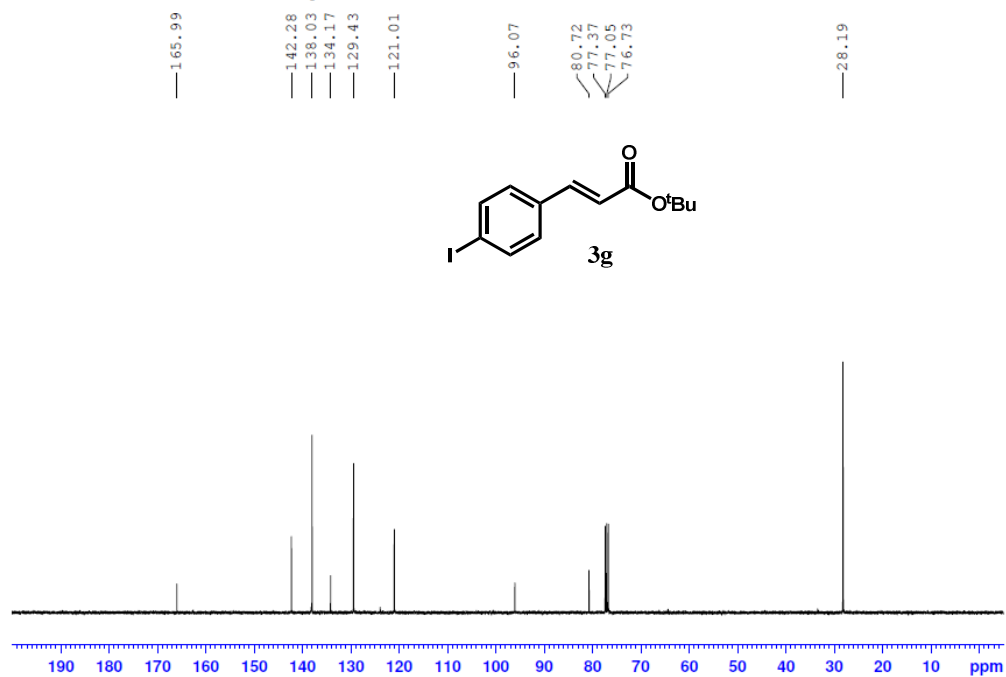

zmk-110430-4-CN-COOtBu-zhongzuo-H , AV400, Apr 2011

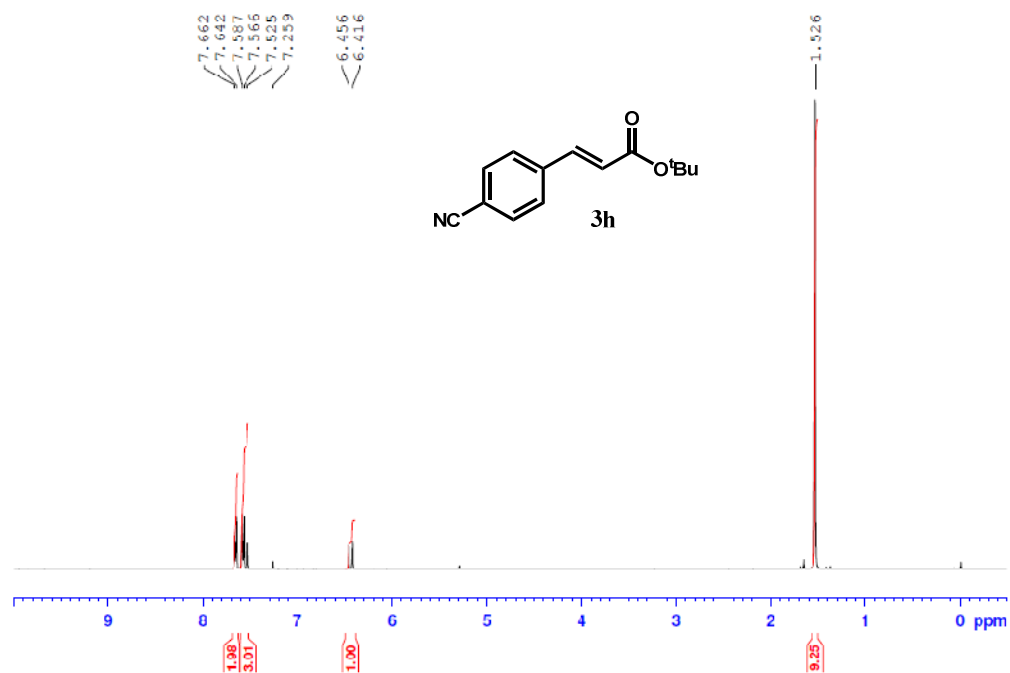

zmk-110409-1-4-CN-C13 1H NMR CDCl3 20110407

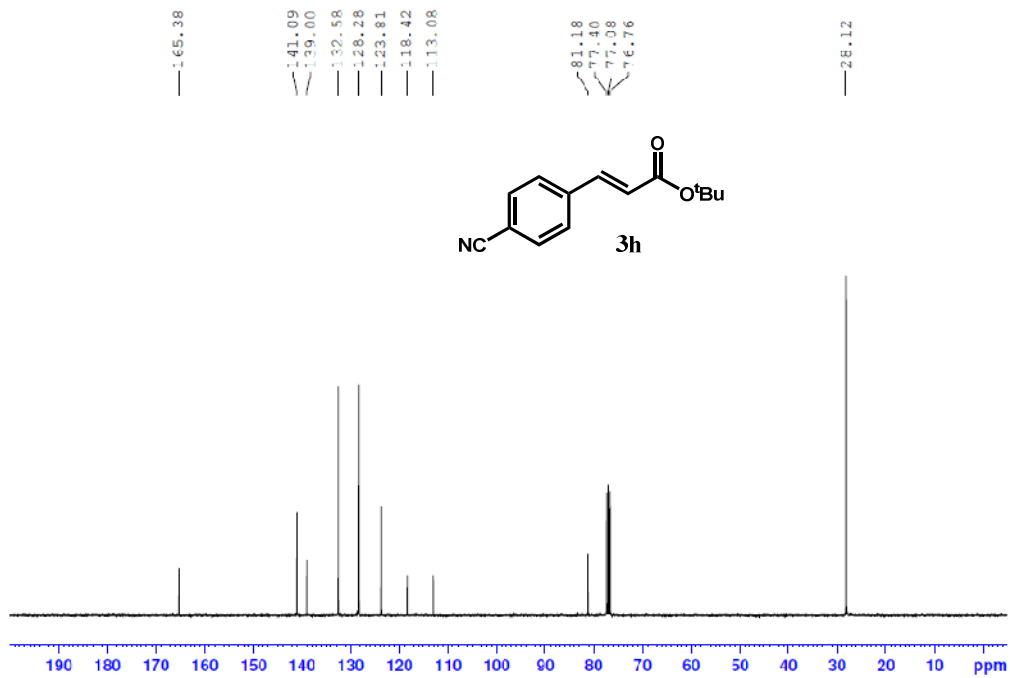

zmk-110428-1-4-COOH-tBu-H , AV400, Apr 2011

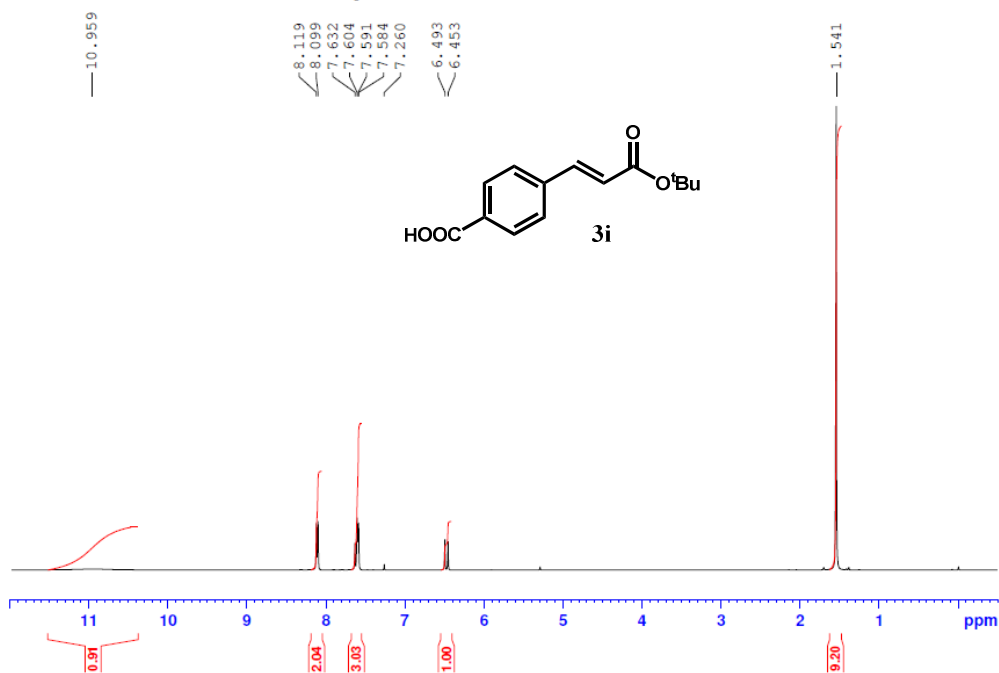

zmk-110428-1-4-COOH-tBu-C13 , AV400, Apr 2011

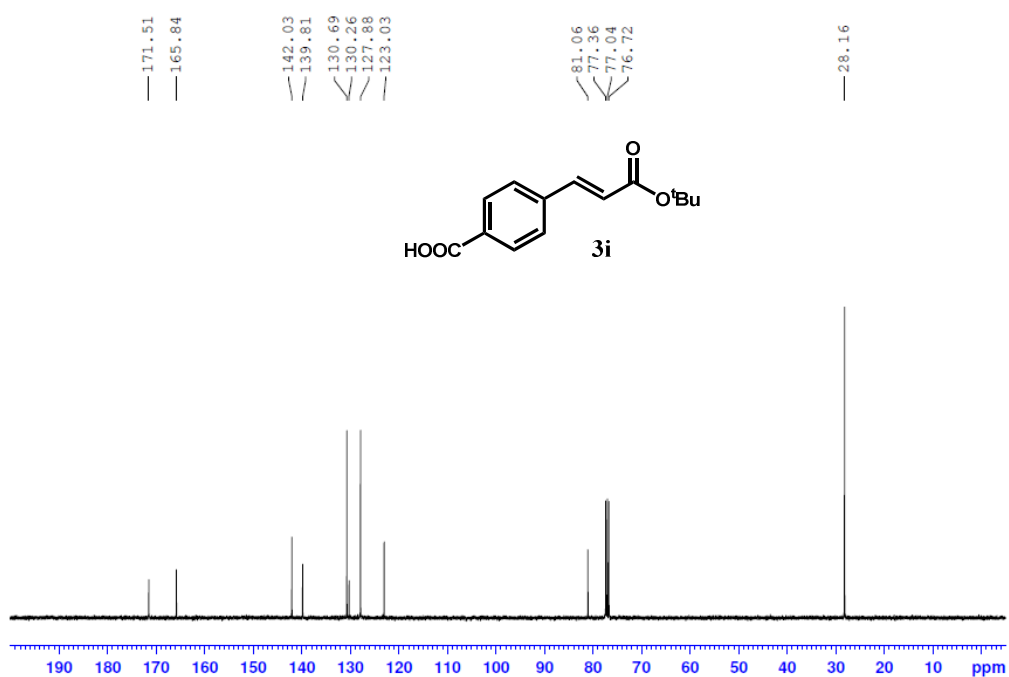

zmk-110427-3-4-CF3-tBu-H , AV100, Apr 2011

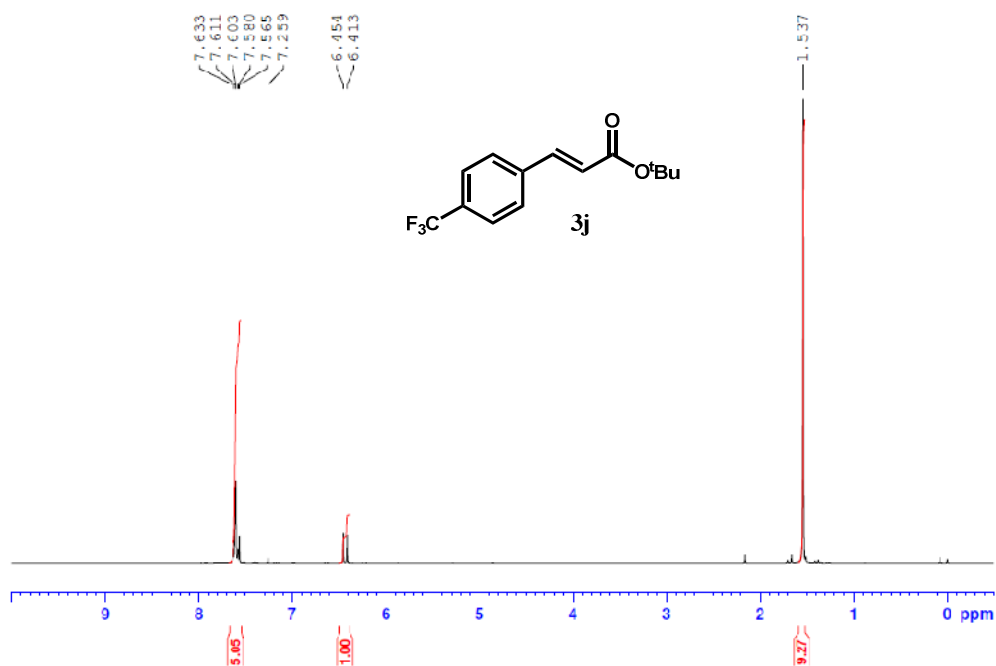

zmk-110427-3-4-CF3-tBu-C13 , AV400, Apr 2011

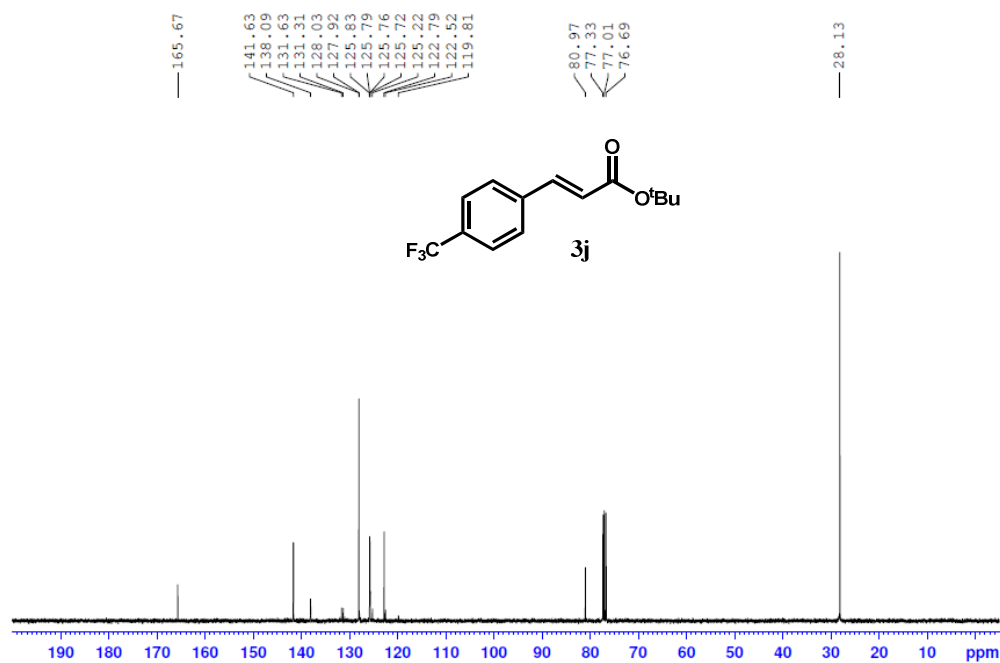

zmk-110430-3-SO<sub>2</sub>NH<sub>2</sub>1-tBu-H , AV400, Apr 2011

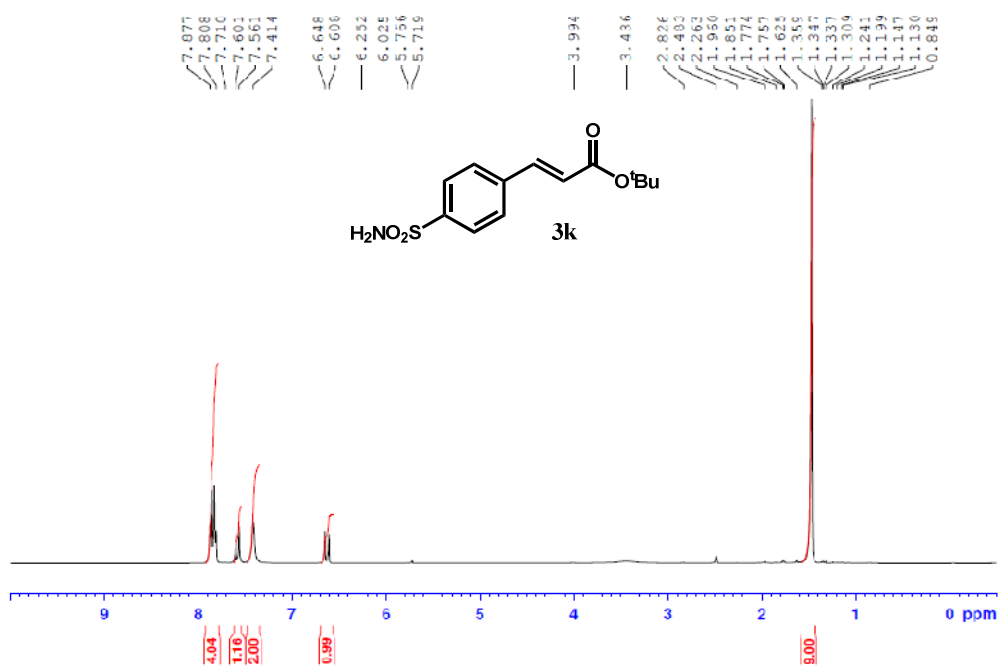

zmk-110430-3-SO<sub>2</sub>NH<sub>2</sub>1-tBu-C13 , AV400, Apr 2011

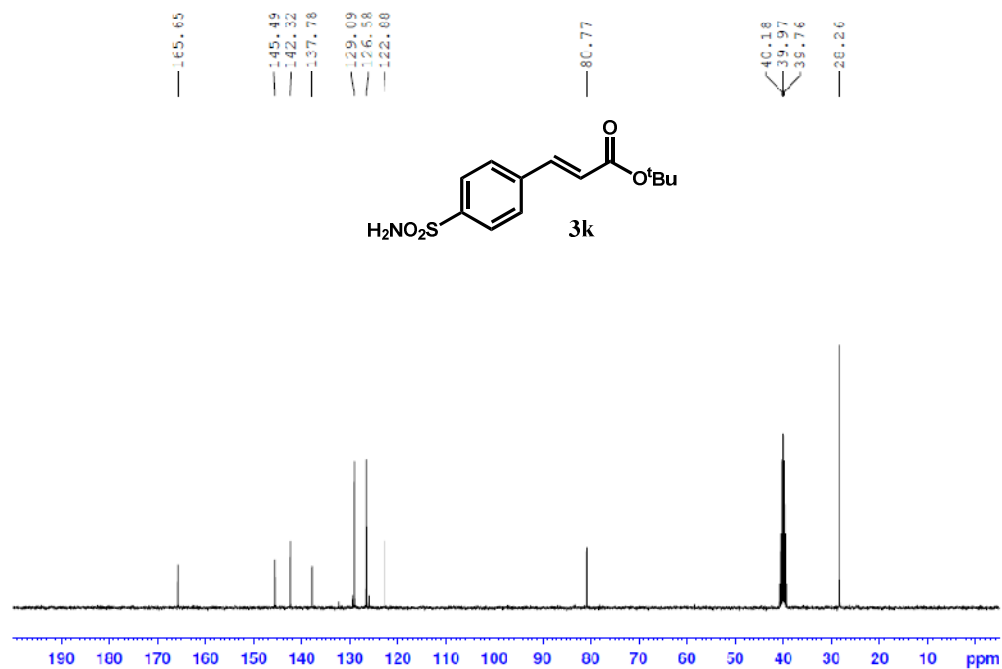



zmk-110410-2-3-Me-H , AV400, Apr 2011

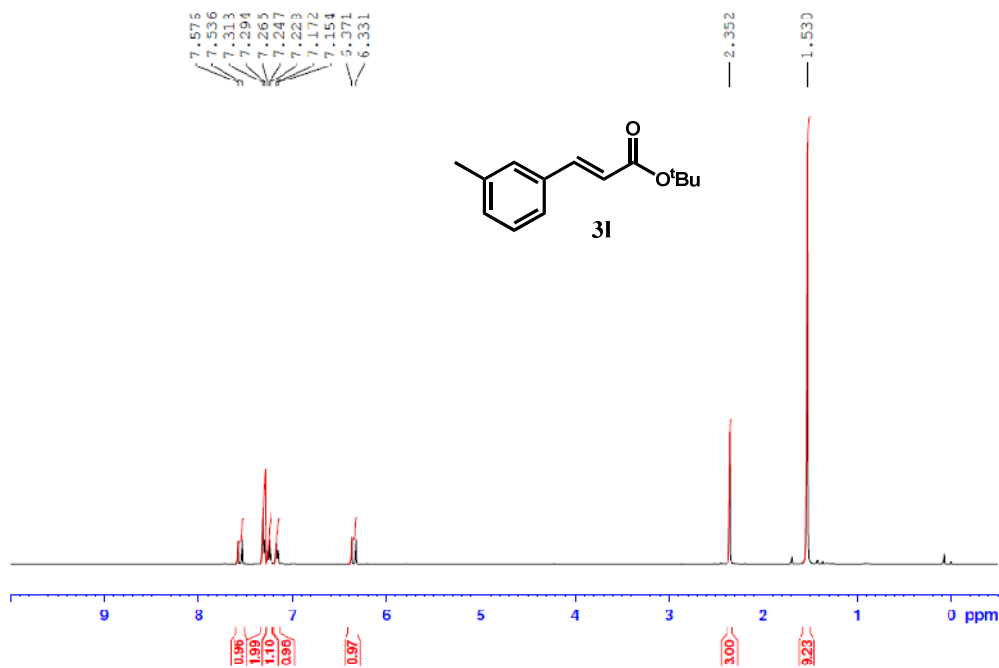

zmk-110410-2-3-Me-C13 , AV400, Apr 2011

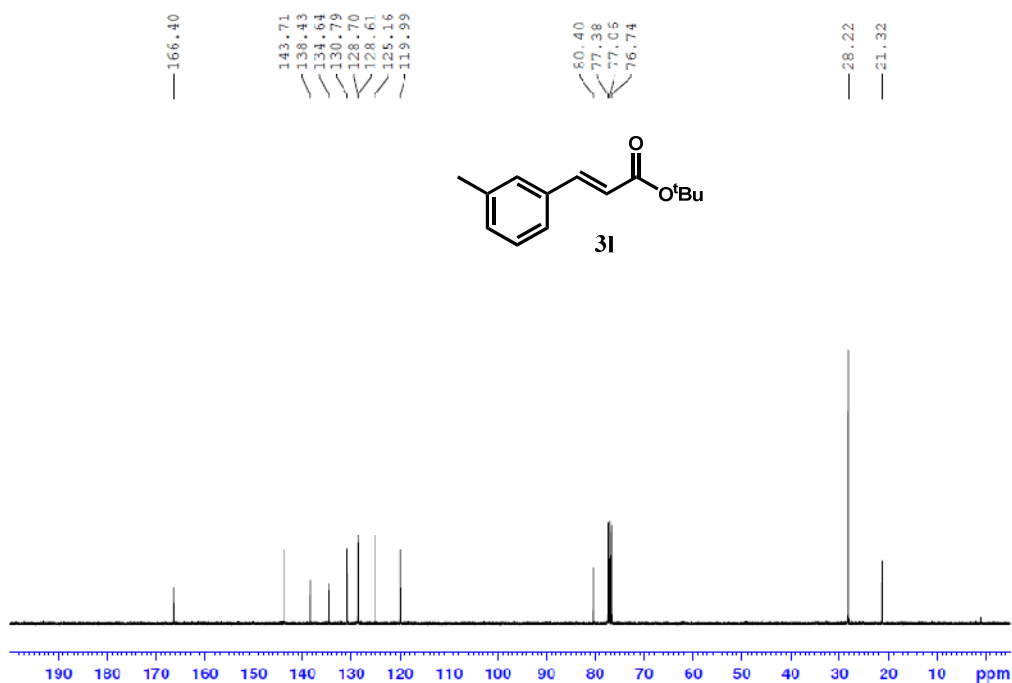

zmk-110504-3-3-Br-cootbu-H , 400 MHz H

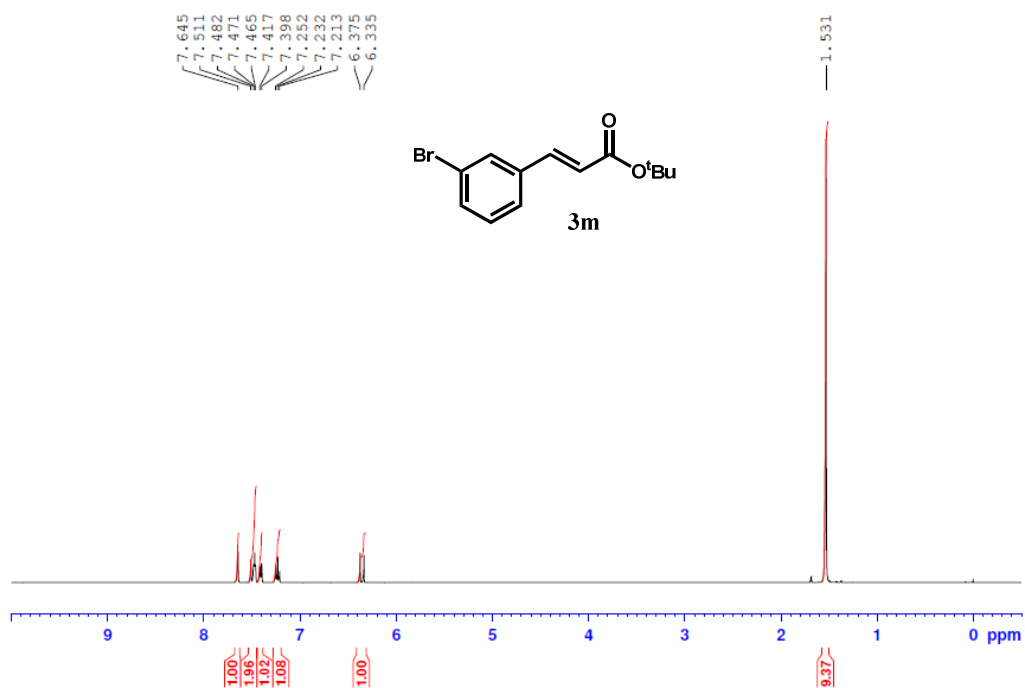

zmk 110504 3 3 Br cootbu C13 , 400 MHz H

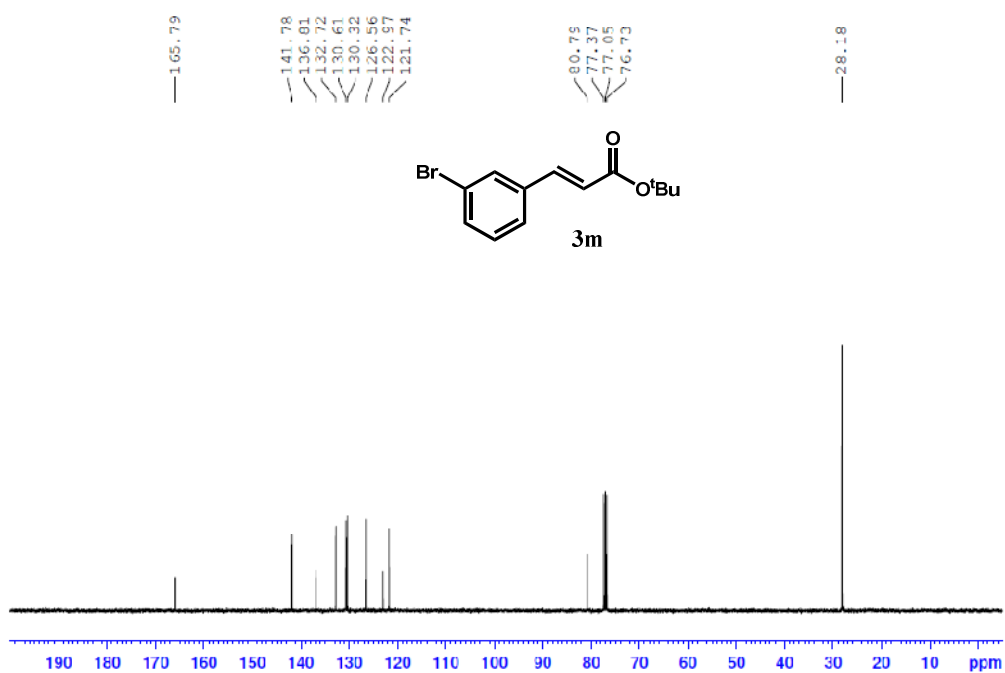

zmk-110429-3-COOH-tBu-H , AV400, Apr 2011

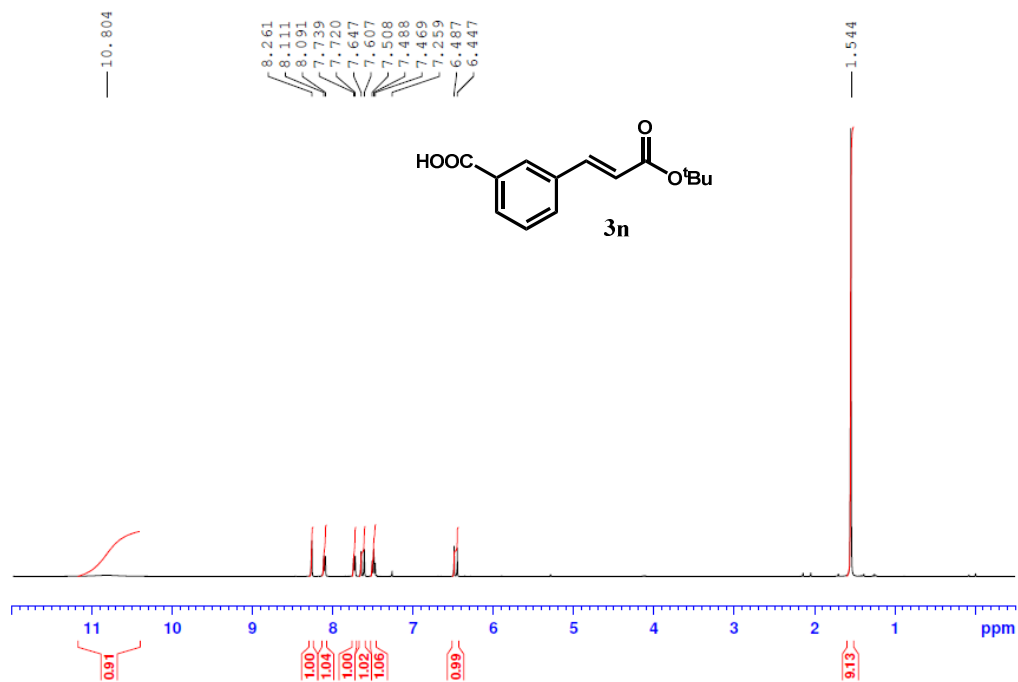

zmk-110429-3-COOH-tBu-Cl3 , AV400, Apr 2011

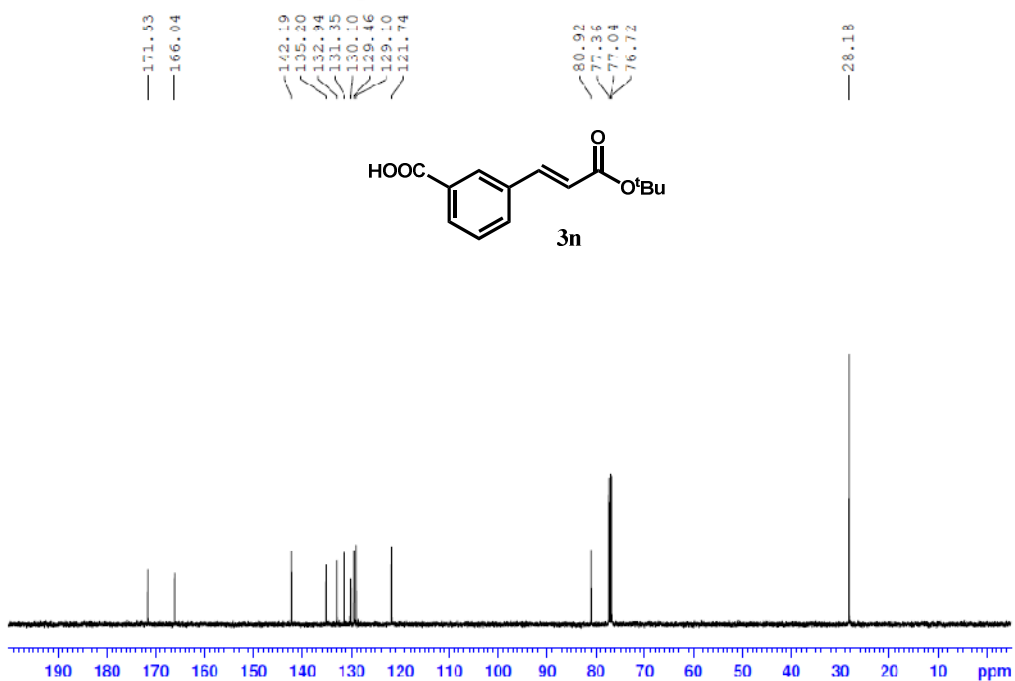

zmk-110410-1-2-Me , AV400, Apr 2011

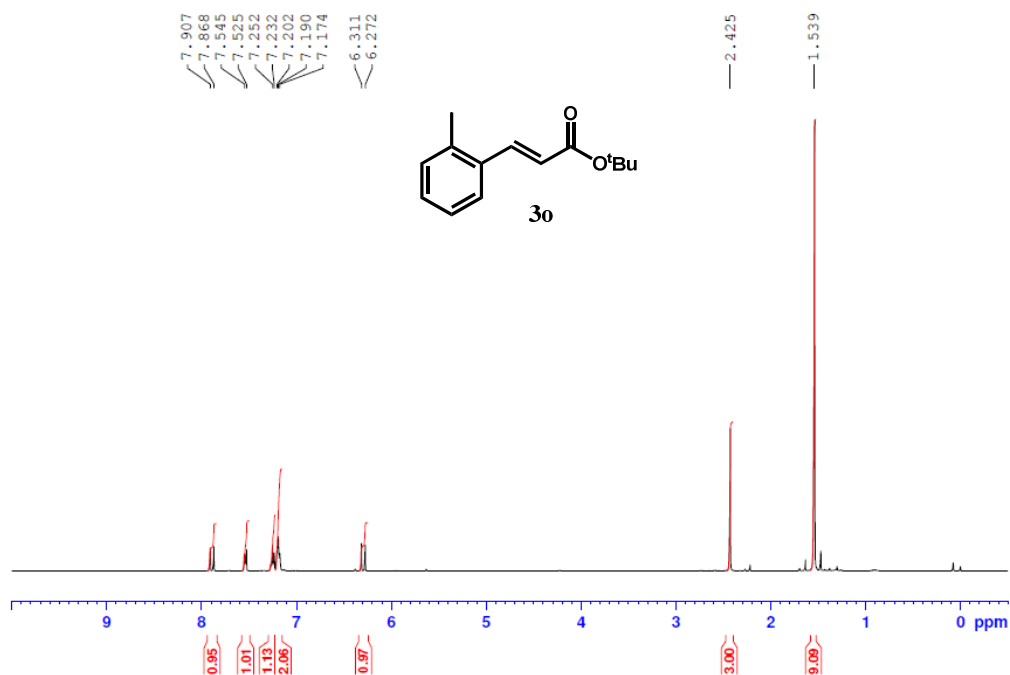

zmk-110410-1-2-Me-Cl3 , AV400, Apr 2011

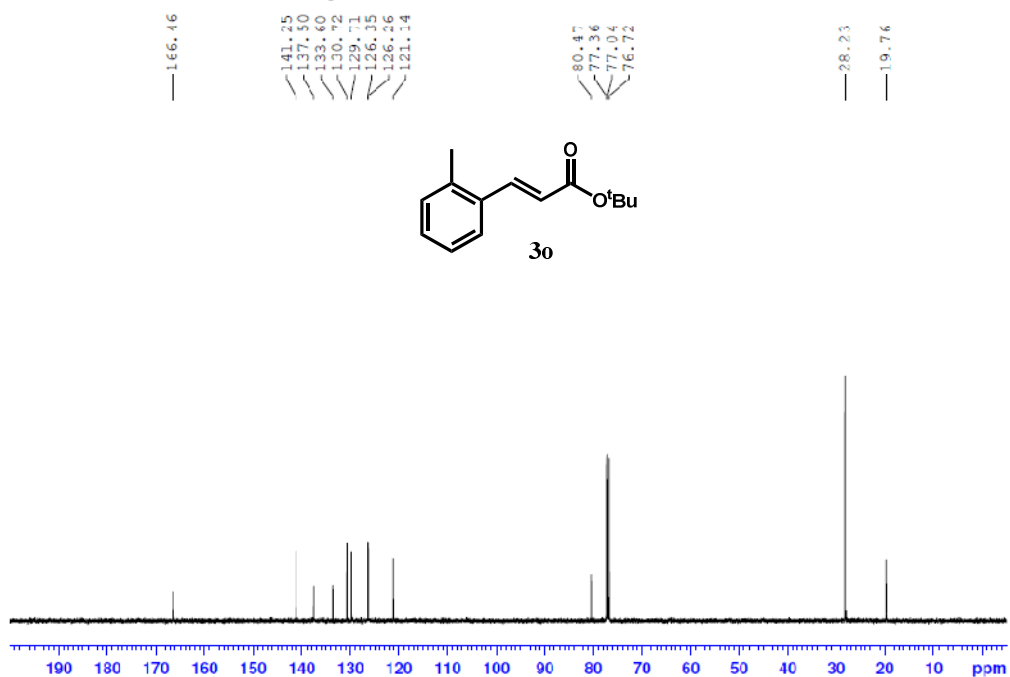

zmk-110428-52-NO2-tBu-H , AV400, Apr 2011

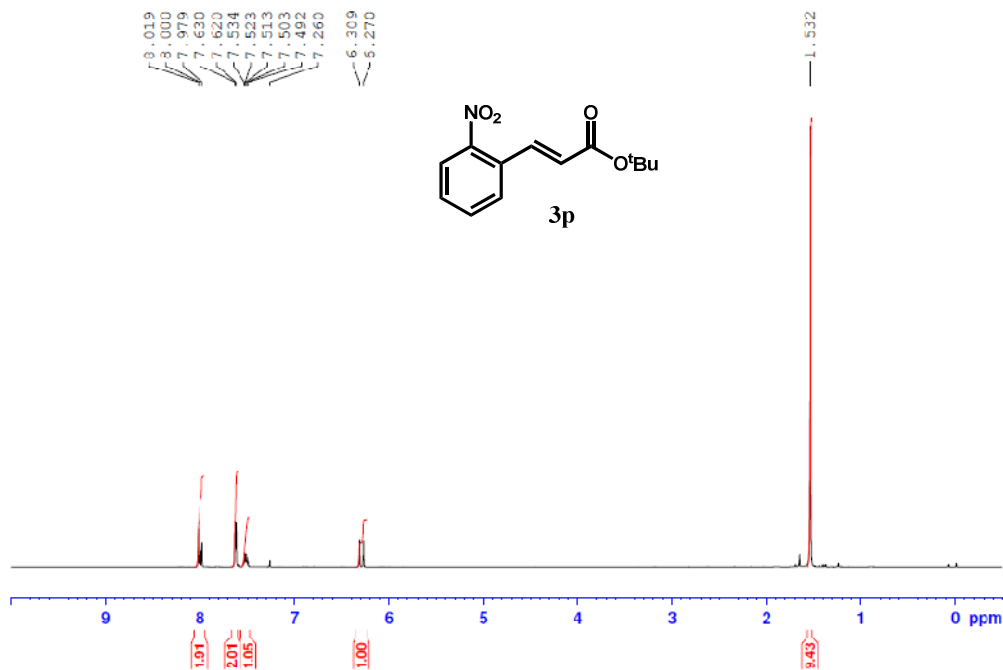

zmk-110428-52-NO2-tBu-Cl3 , AV400, Apr 2011

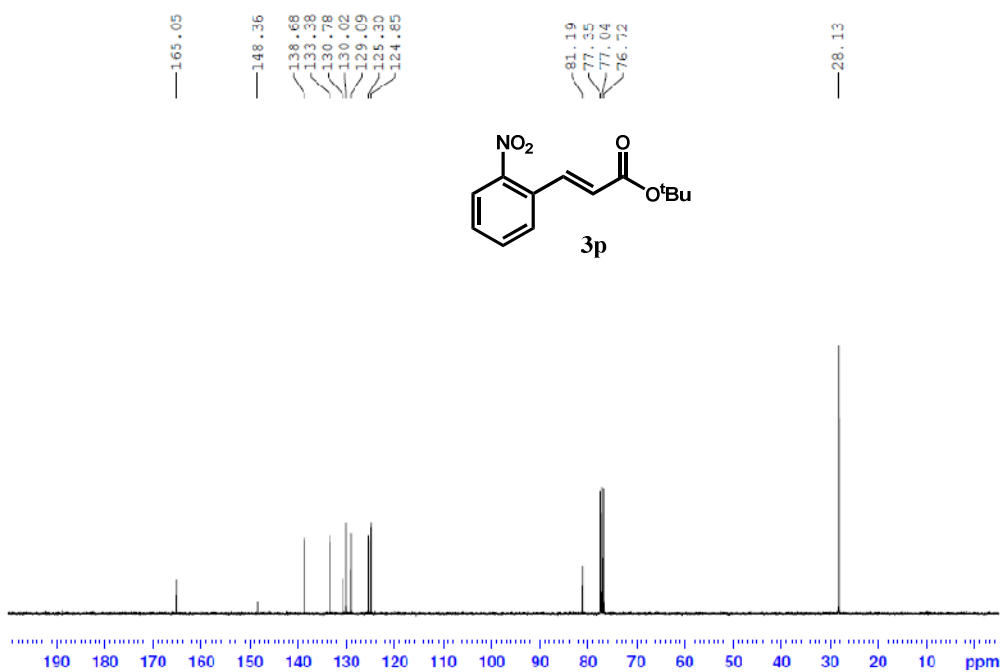

zmk-110411-2-3-OMe--4-OMe-H , AV400, Apr 2011

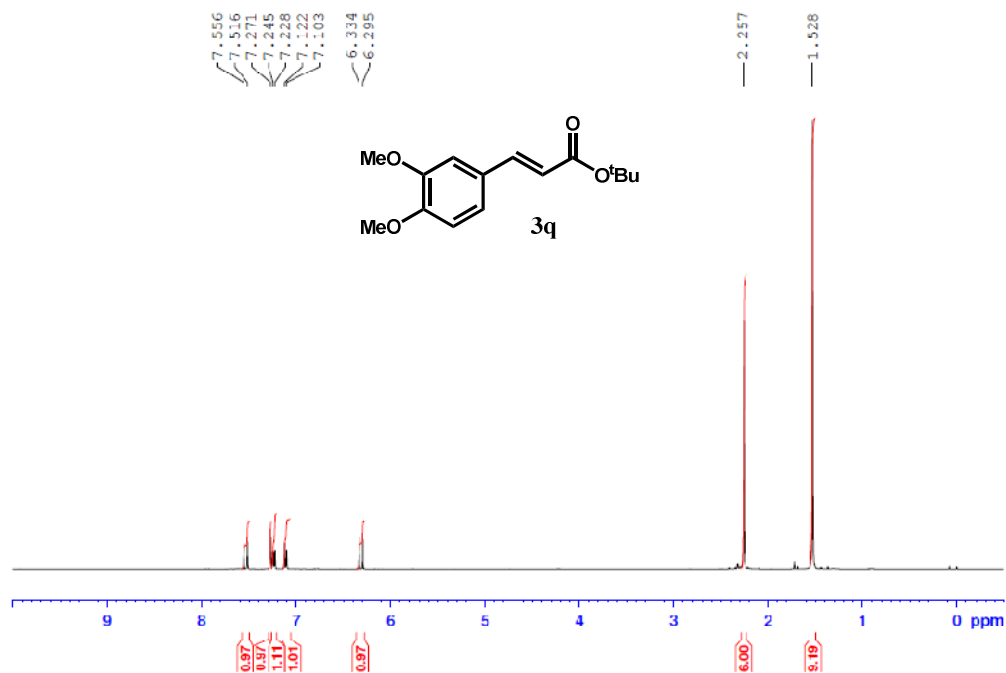

zmk-110411-2-3-OMe--4-OMe-Cl3 , AV400, Apr 2011

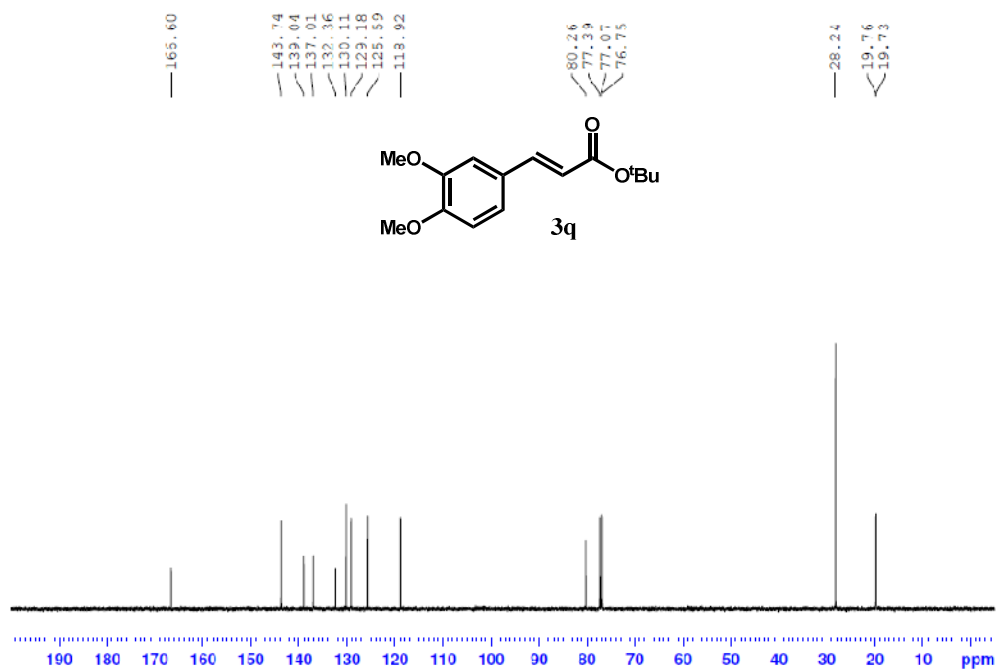

zmk 110411 1 3 Cl 4 F H , AV400, Apr 2011

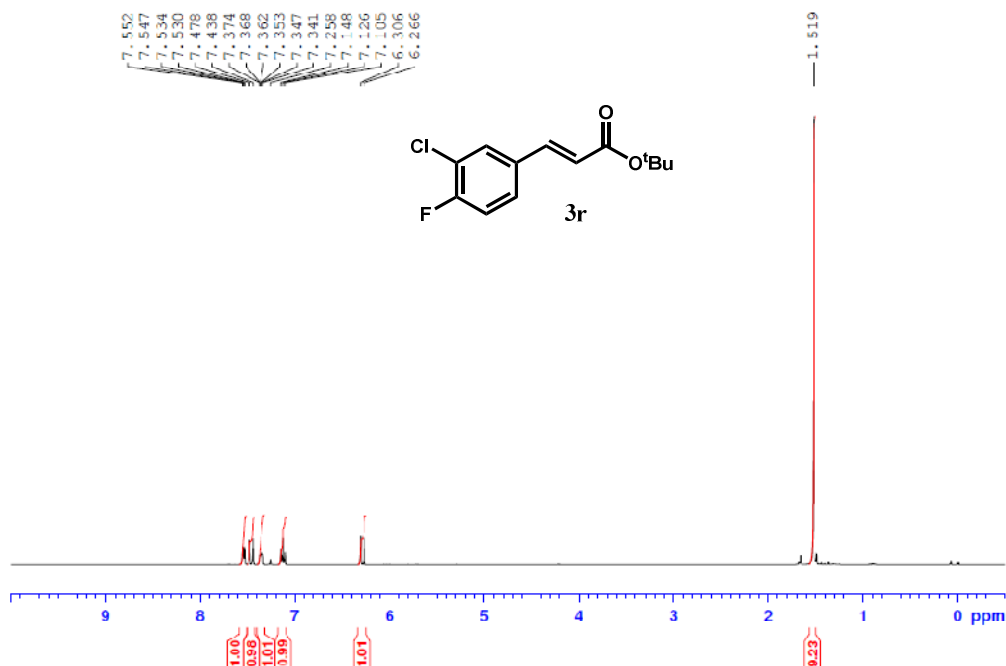

zmk 110411 1 3 Cl 4 F Cl3 , AV400, Apr 2011

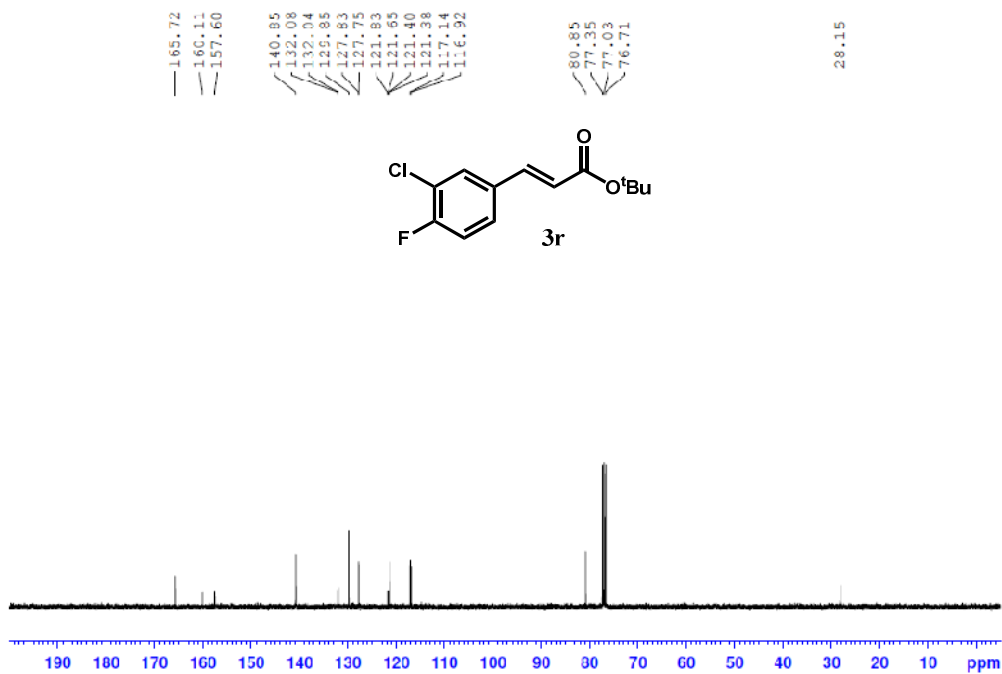

zmk-110427-4-3,5-2Cl-tBu-H , AV400, Apr 2011

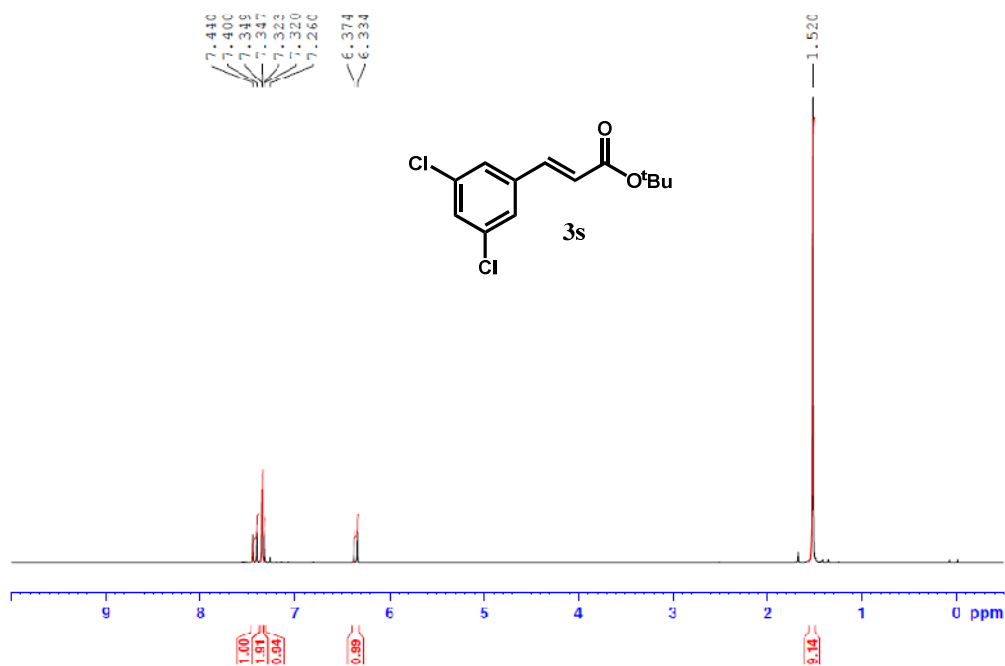

zmk-110427-4-3,5-2Cl-tBu-Cl3 , AV400, Apr 2011

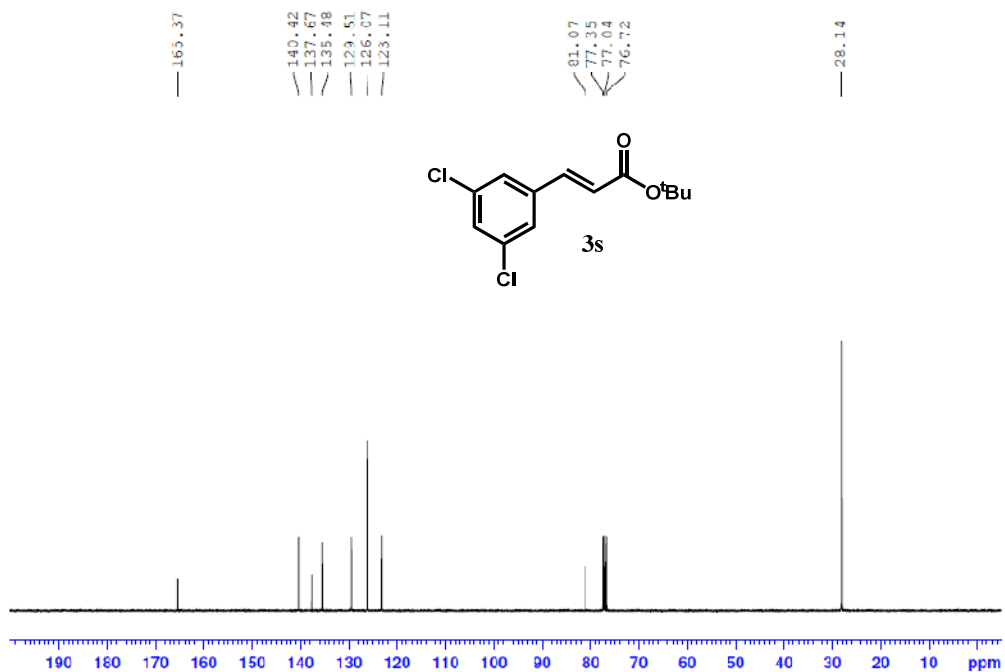



znk-110428-2-2,5-2F-tBu-H , AV400, Apr 2011

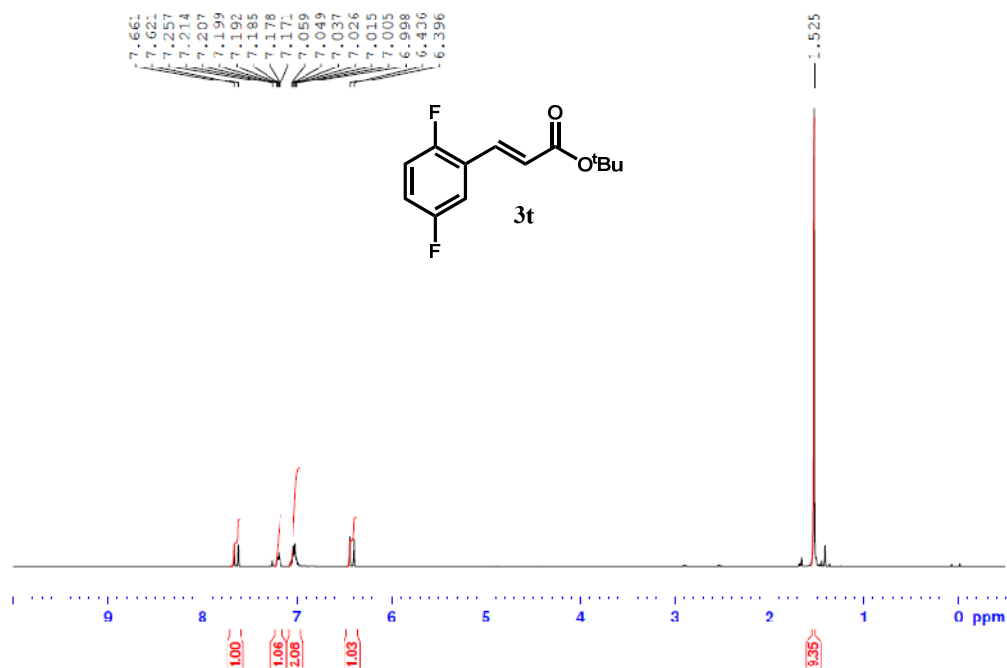

znk-110428-2-2,5-2F-tBu-C13 , AV400, Apr 2011

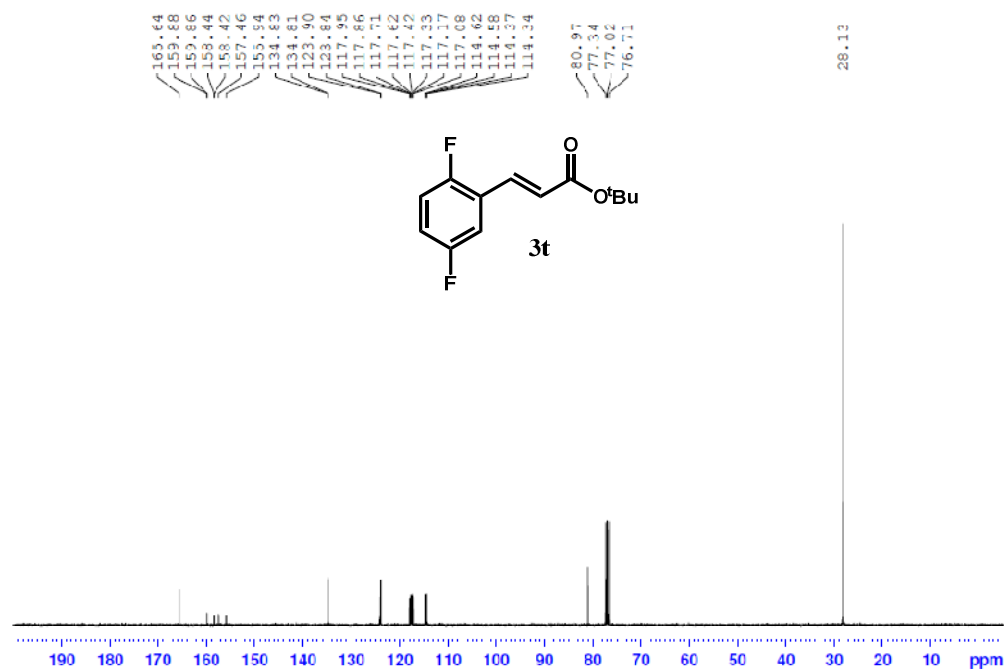

zmk-110503-1-COOH-nBu-2-H , 400 MHz H

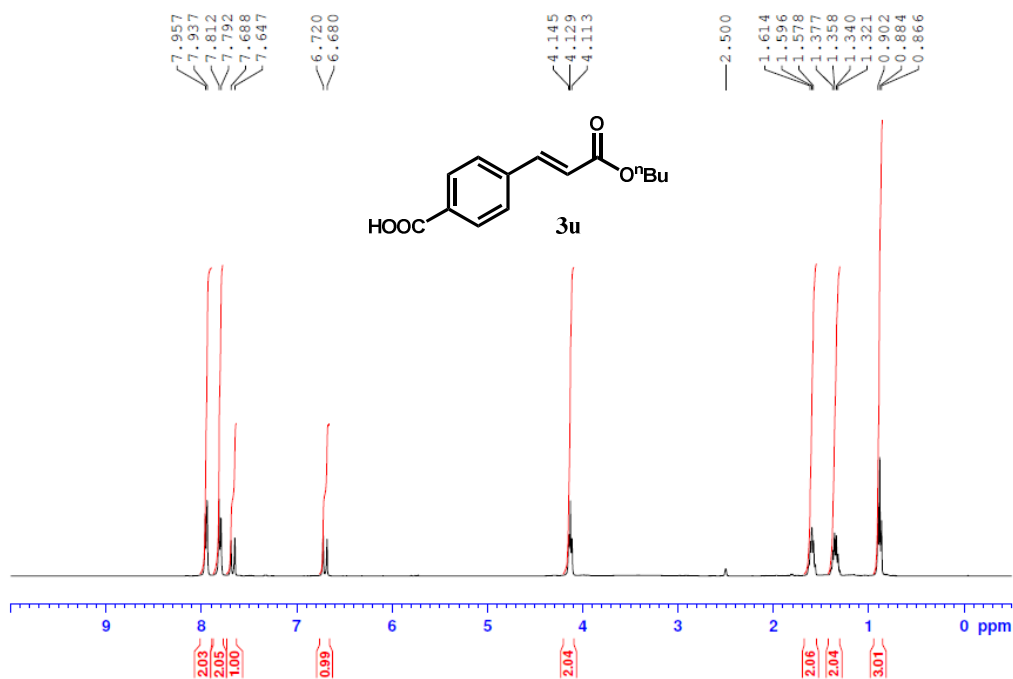

zmk-110503-1-COOH-nBu-2-C13 , 400 MHz H

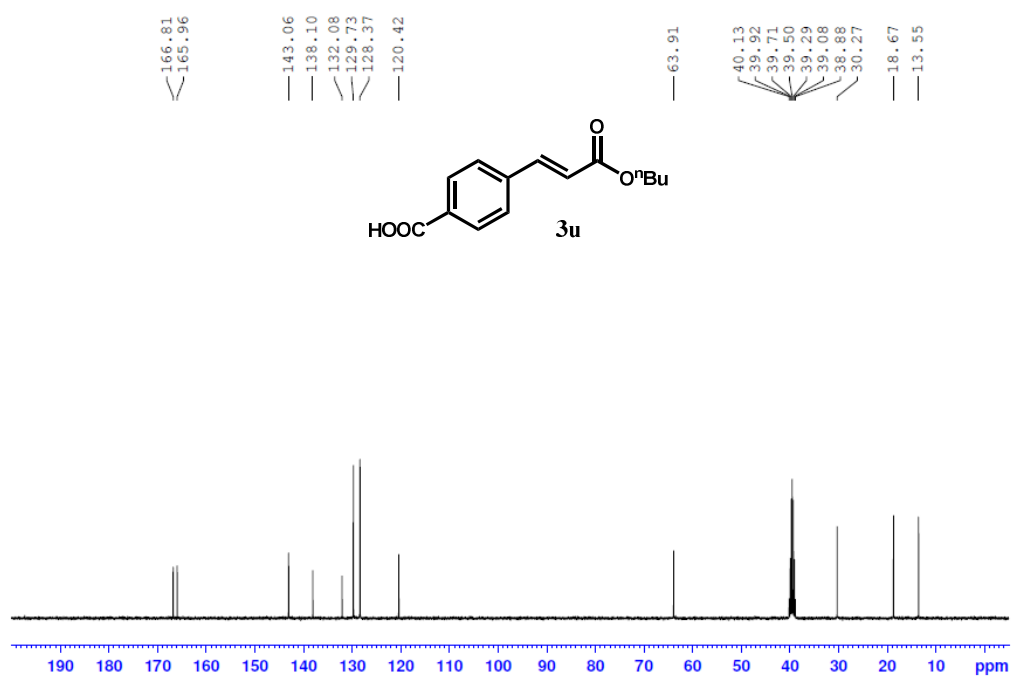

zmk-110503-3-COOH-Et-H , 400 MHz H

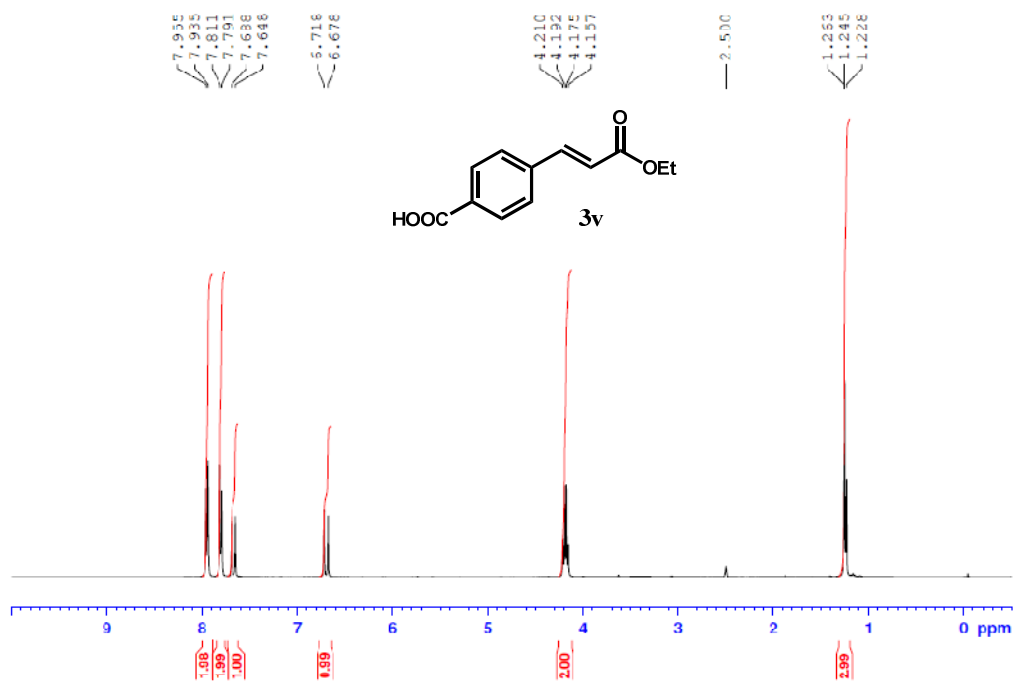

zmk-110503-3-COOH-Et-Cl3 , 400 MHz H

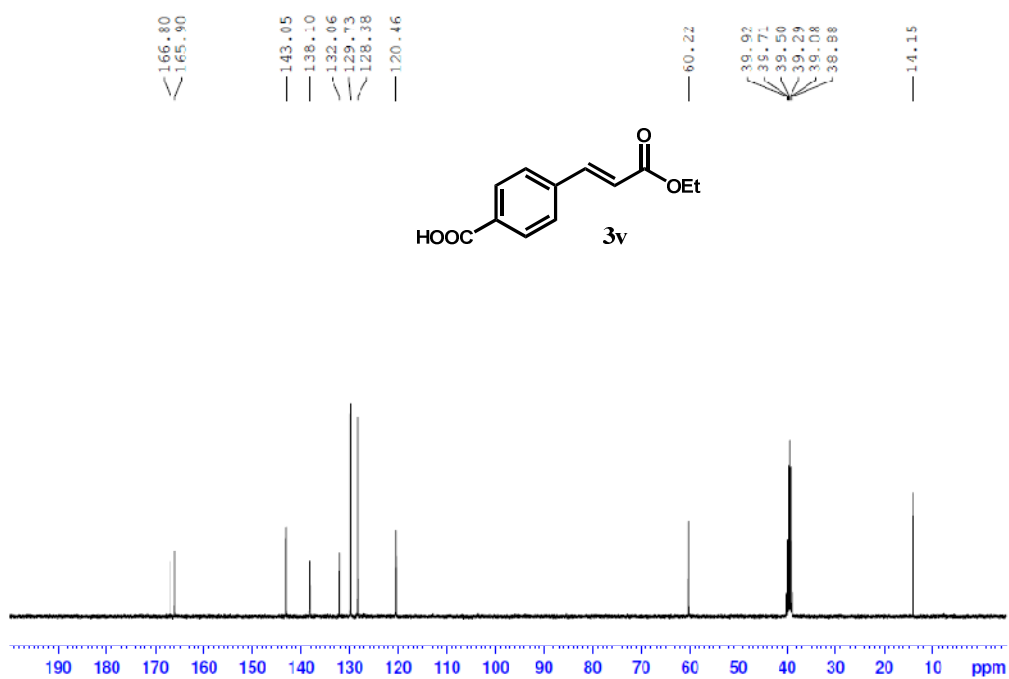

zmk-110503-2-COOH-Me-H , 400 MHz H

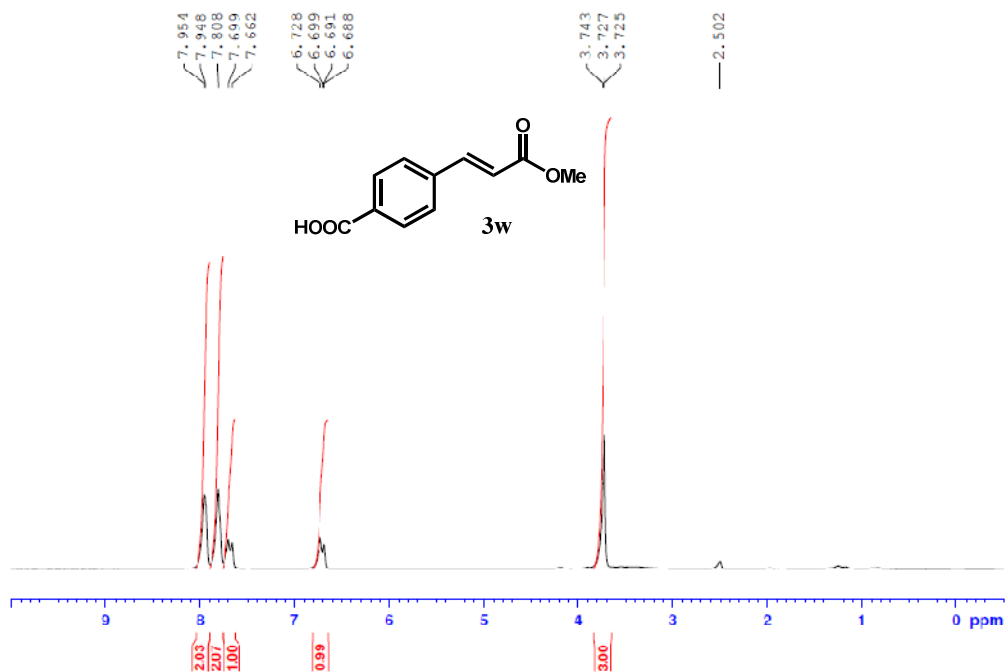

zmk-110503-2-COOH-Me-C13 , 400 MHz H

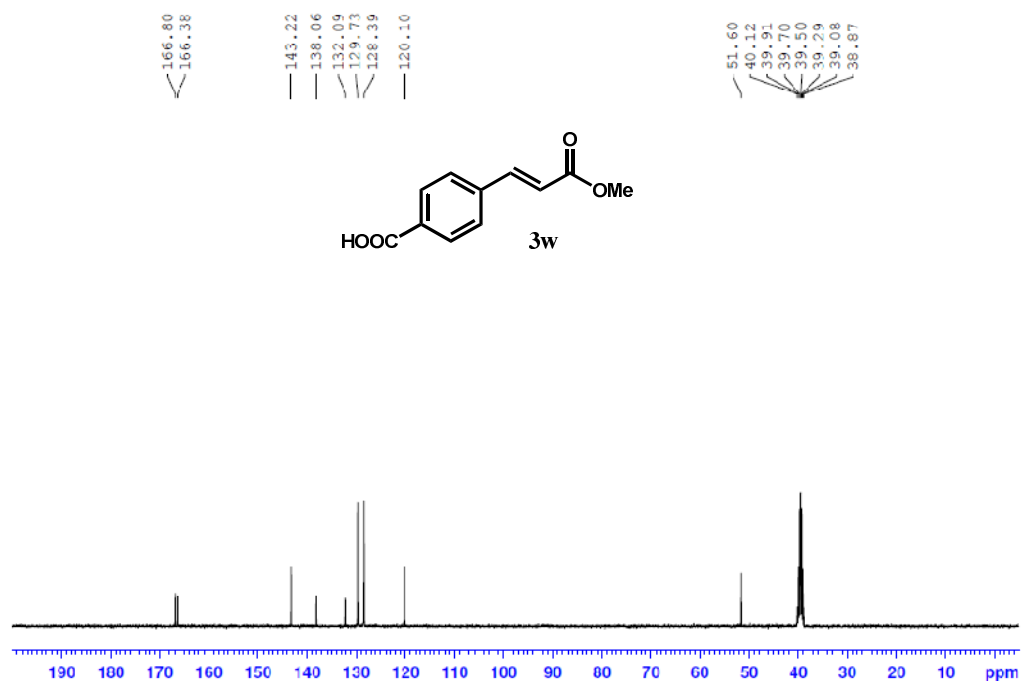

zmk-110421-4-Me+COOnBu-H , AV400, Apr 2011

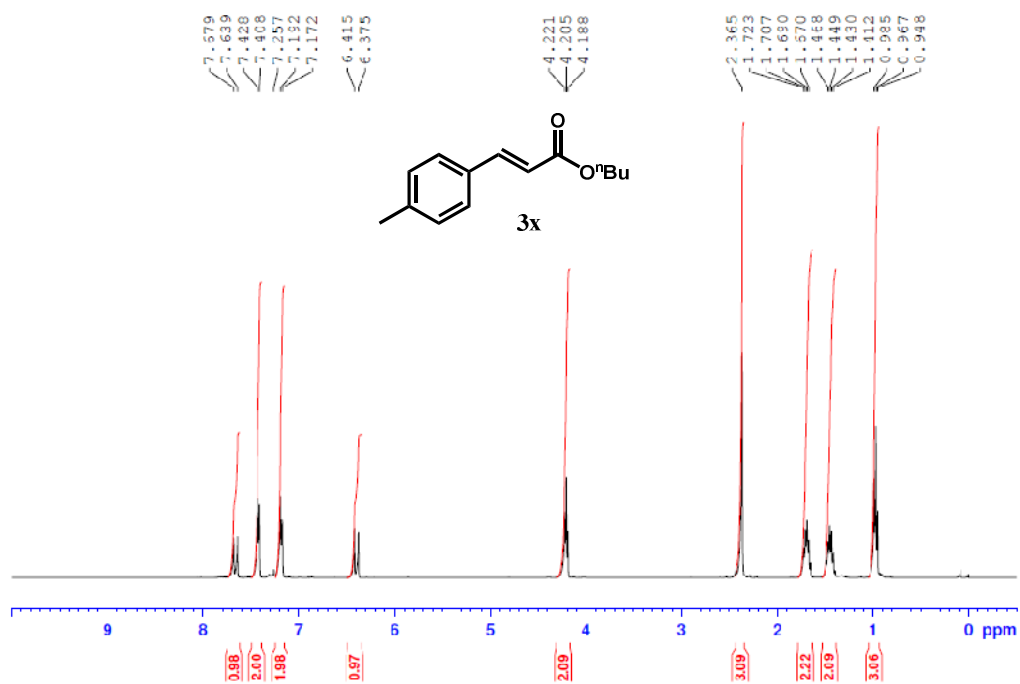

zmk-110421-4-Me+COOnBu-Cl3 , AV400, Apr 2011

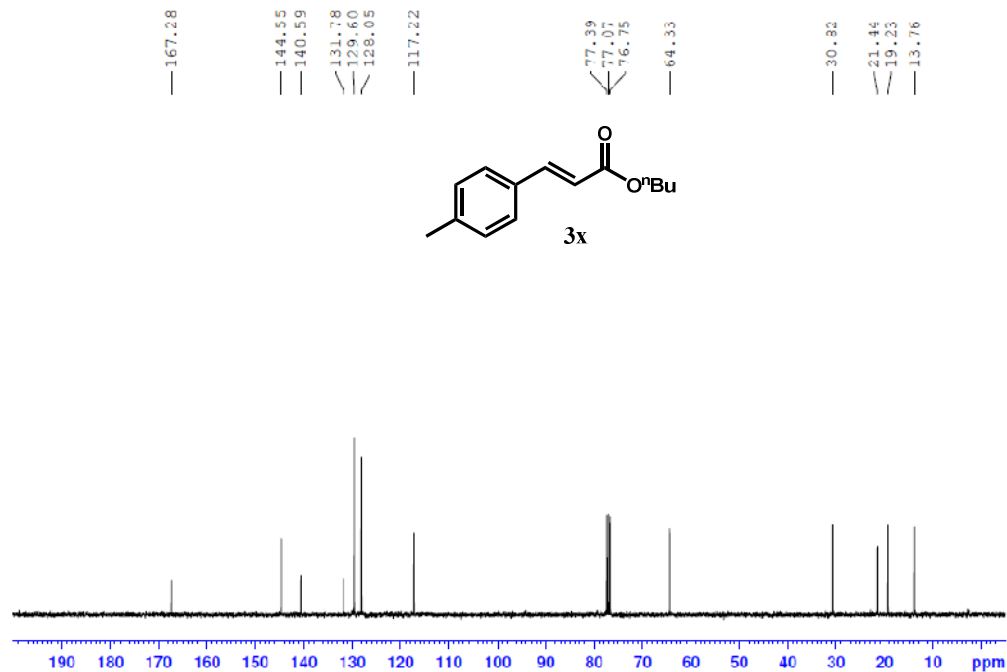

zmk-110423-4-Me+COONEt---1-H, AV400, Apr 2011

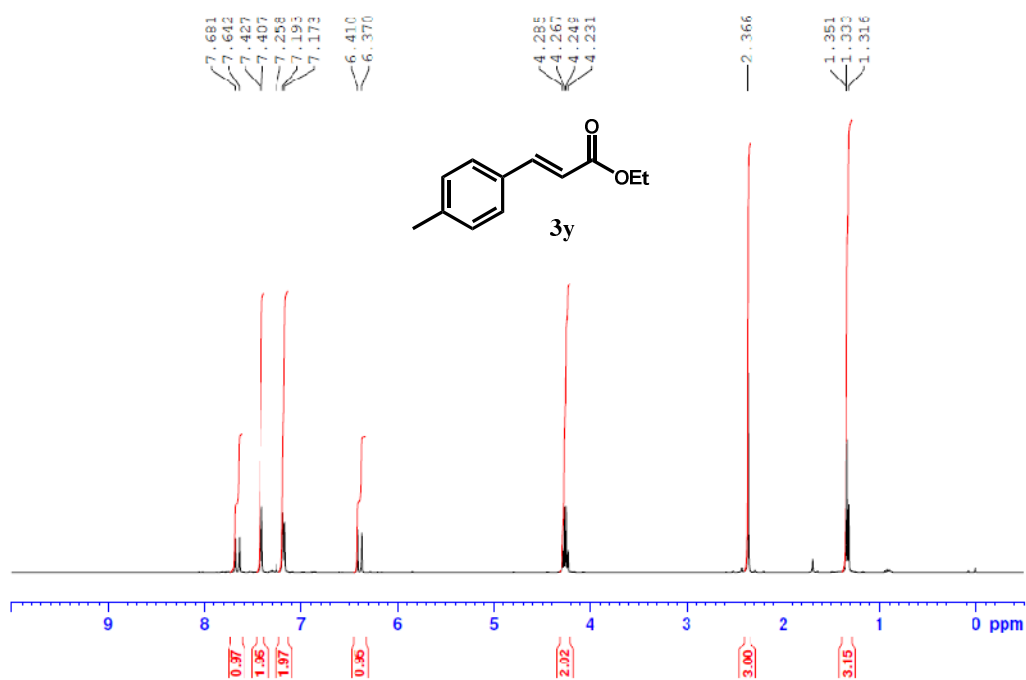

zmk-110423-4-Me+COONEt---1-Cl3, AV400, Apr 2011

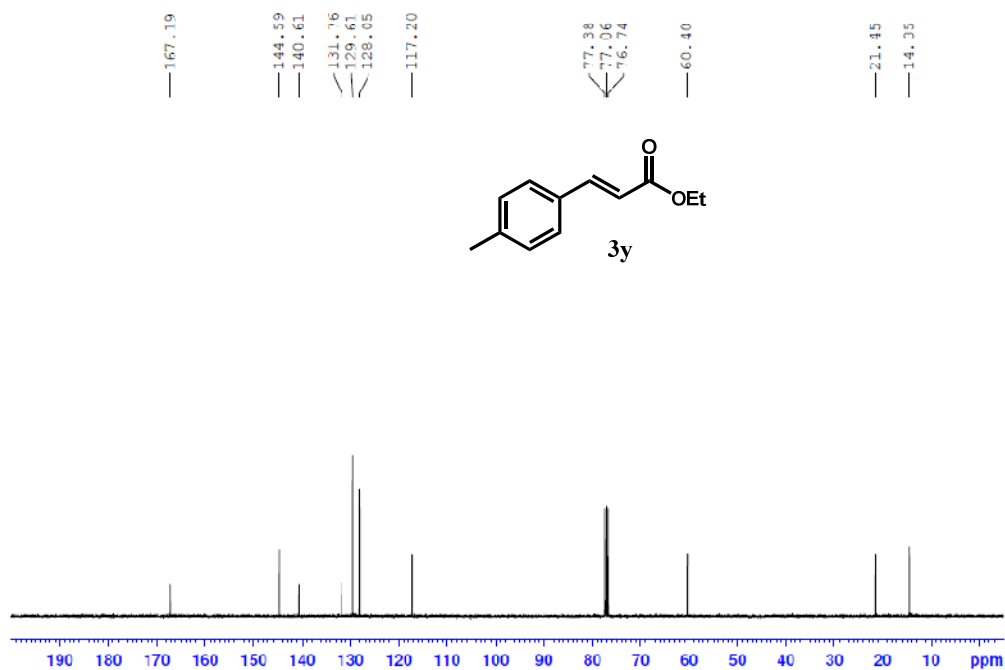

zmk-110419-4-Me+COOMe-H , AV400, Apr 2011

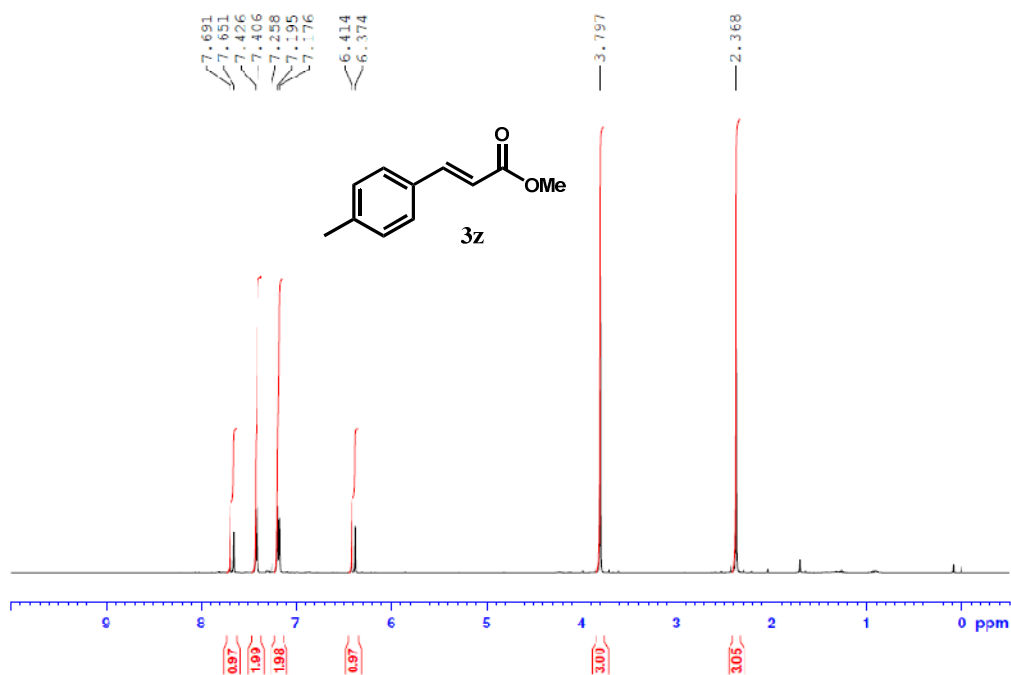

zmk-110419-4-Me+COOMe-C13 , AV400, Apr 2011

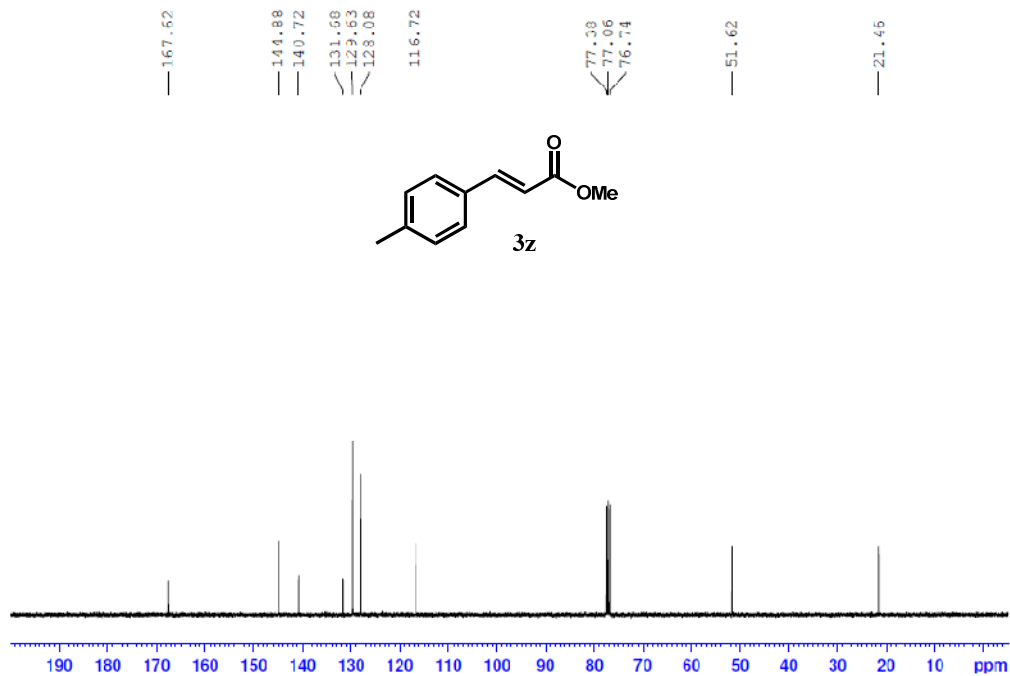

zmk-110430-PhMe-Et-H , AV400, Apr 2011

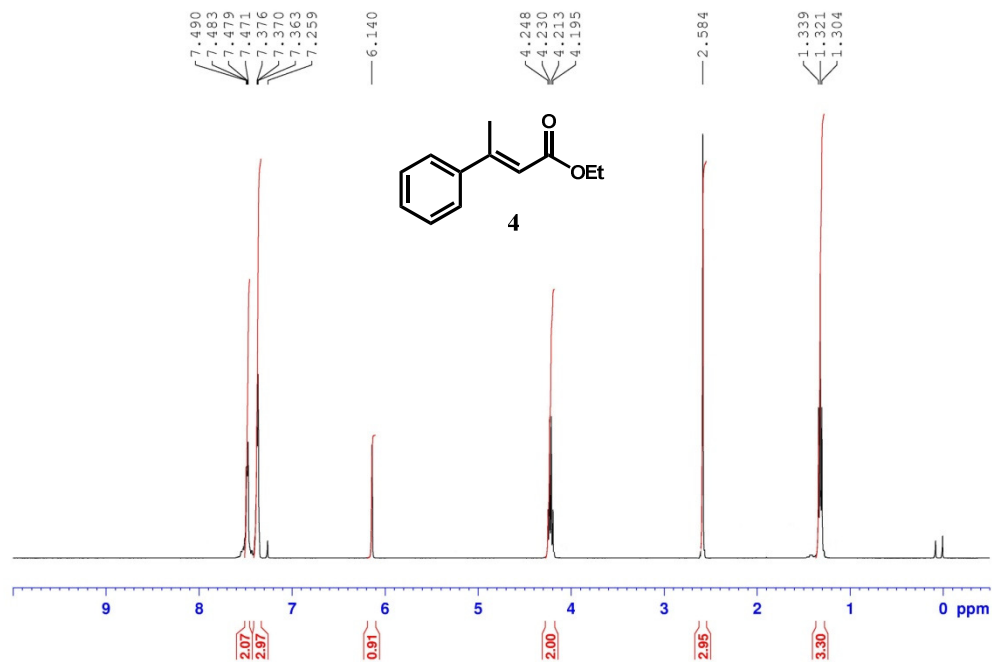

zmk-110430-PhMe-Et-Cl3 , AV400, Apr 2011

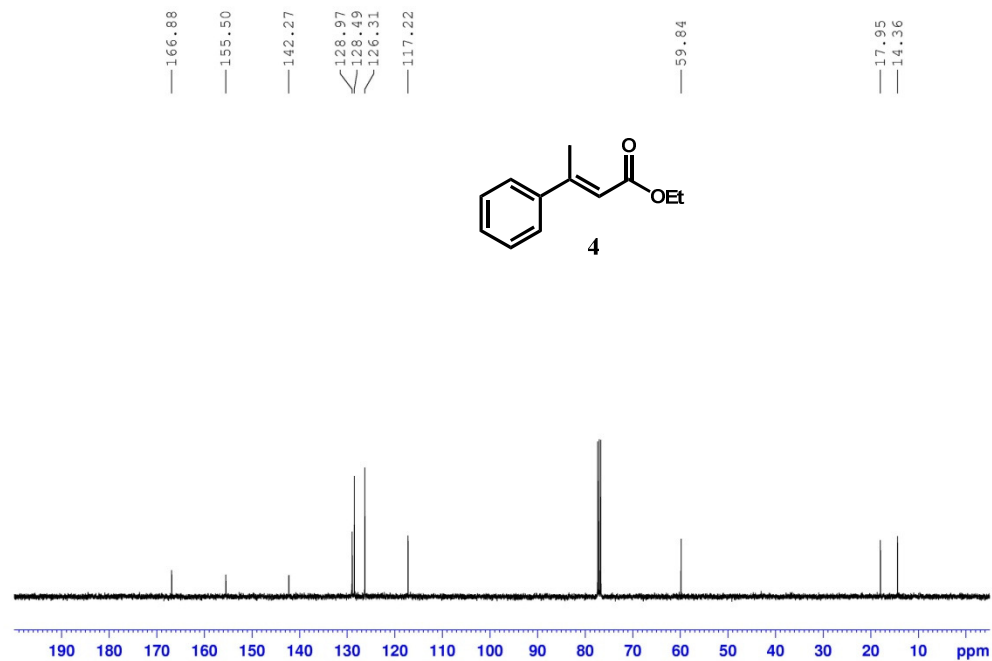



zmk-110424-4-CN+PhCOOEt-E, AV400, Apr 2011

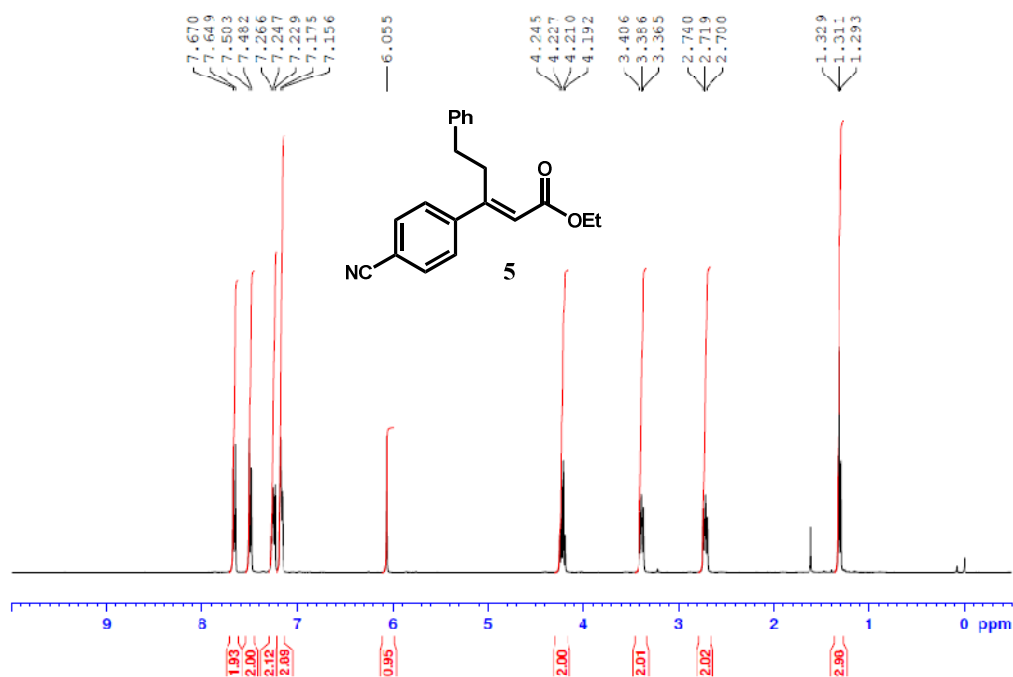

zmk-110424-4-CN+PhCOOEt-Cl3, AV400, Apr 2011

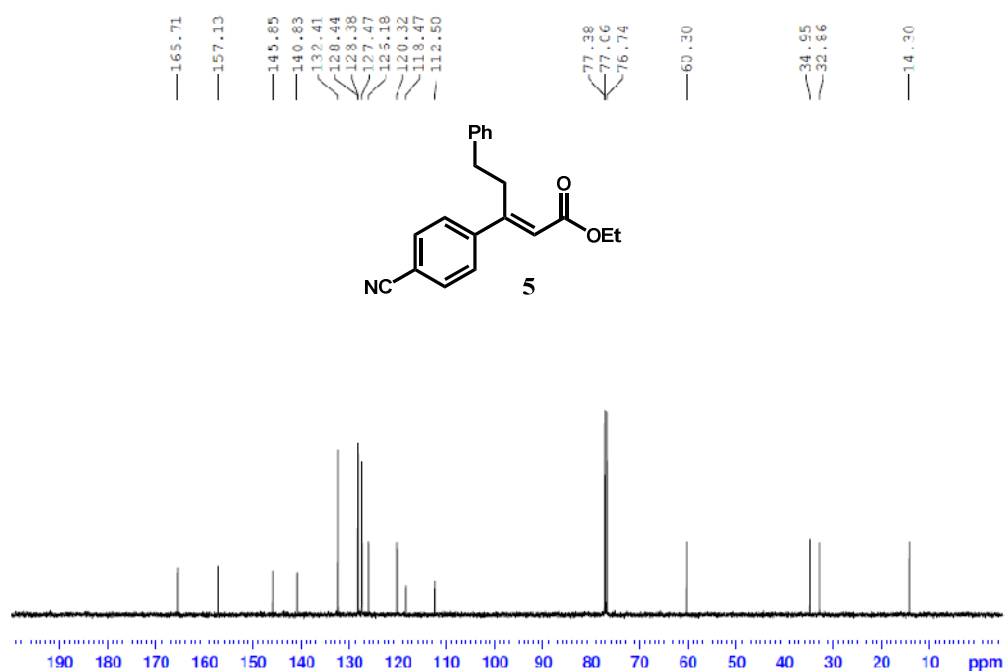

zmk-110505-1-4-Me--cCN-H , 400 MHz H

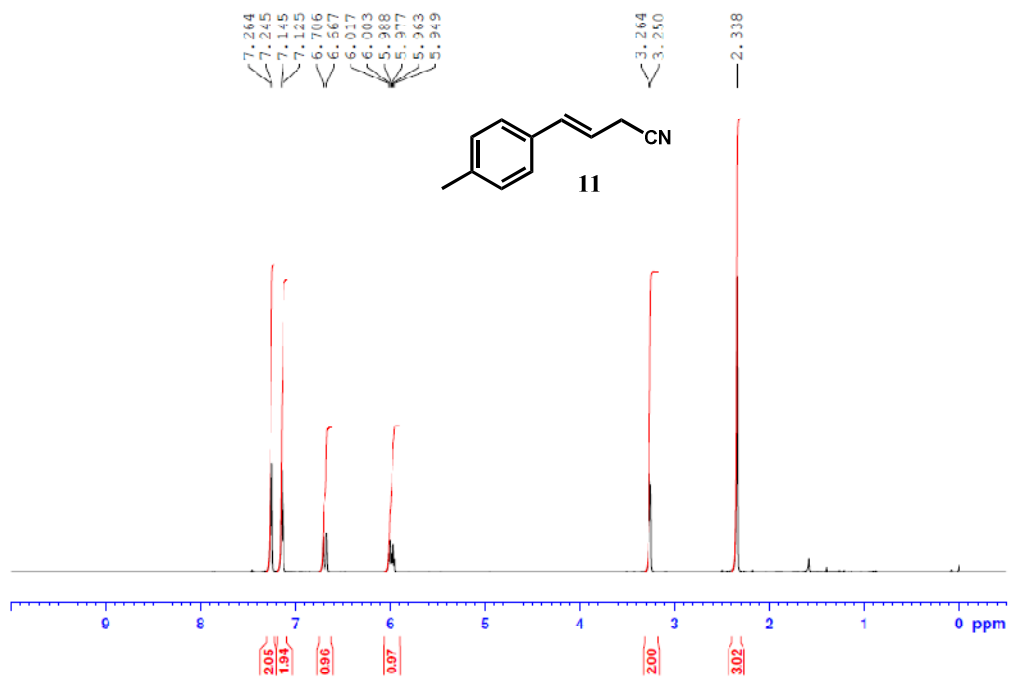

zmk-110505-1-4-Me--cCN-Cl3 , 400 MHz H

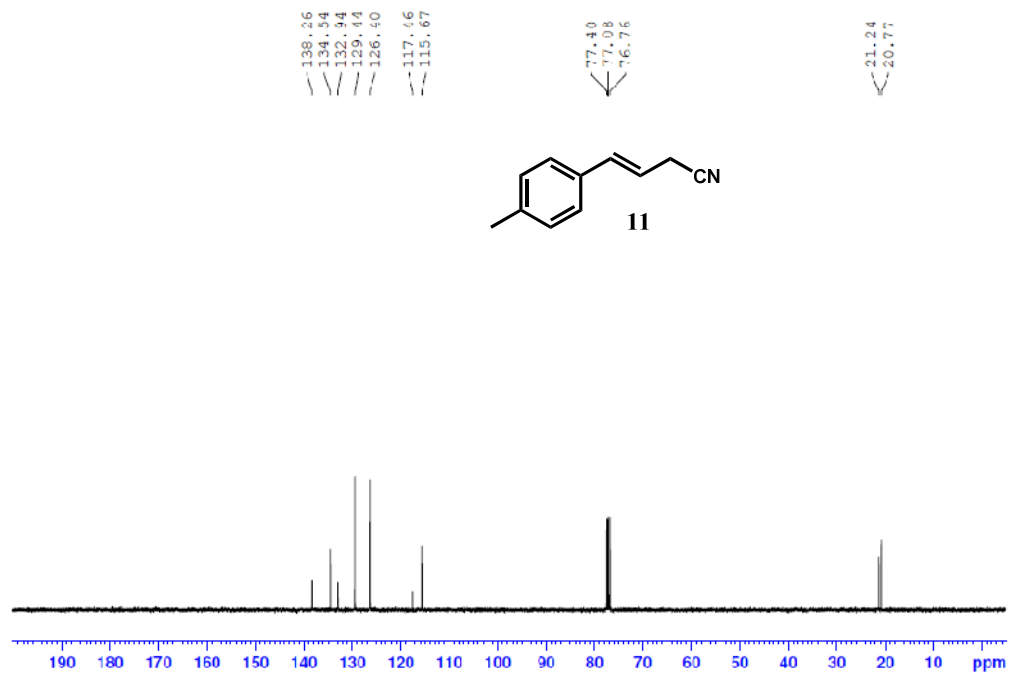

zmk-110505-1-4-Me--cCN-shang -H , 400 MHz H

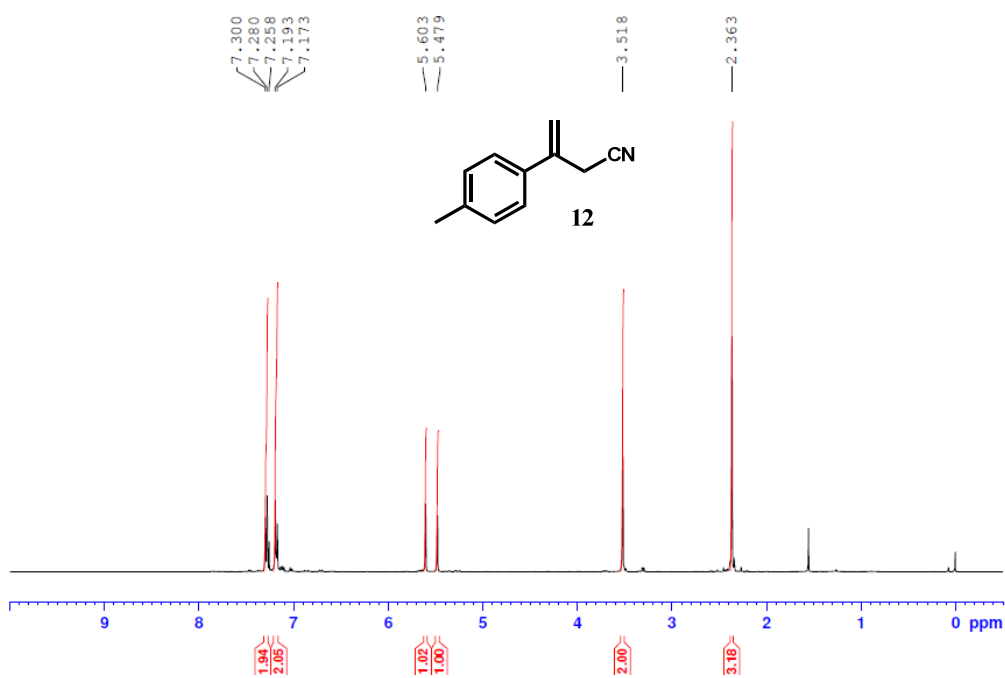

zmk-110505-1-4-Me--cCN-shang -C13 , 400 MHz H

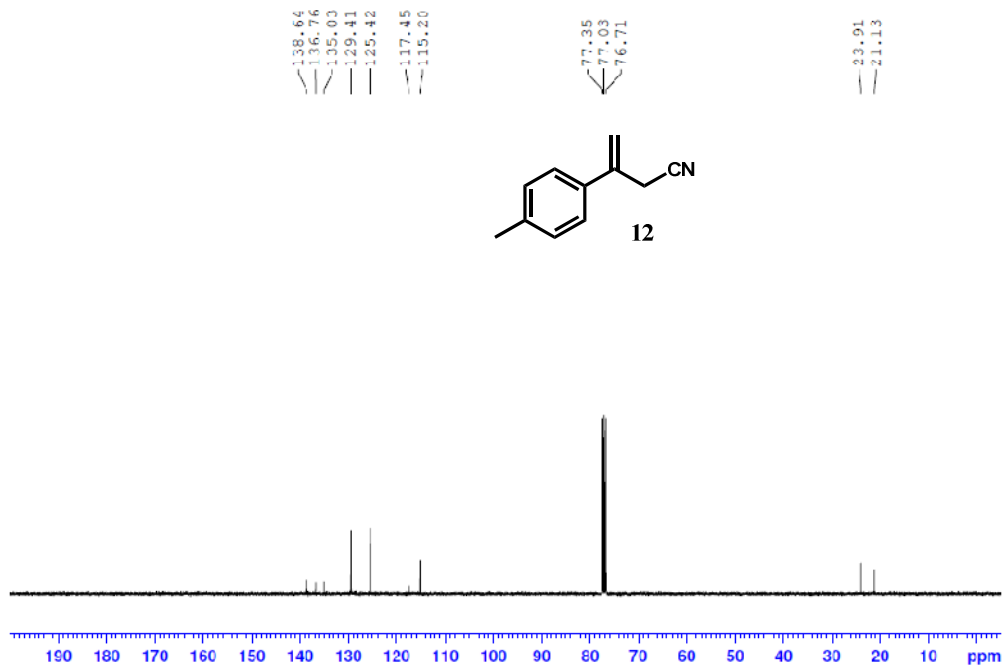

zmk-110606-1-4-CN-H-dry  
400 MHz

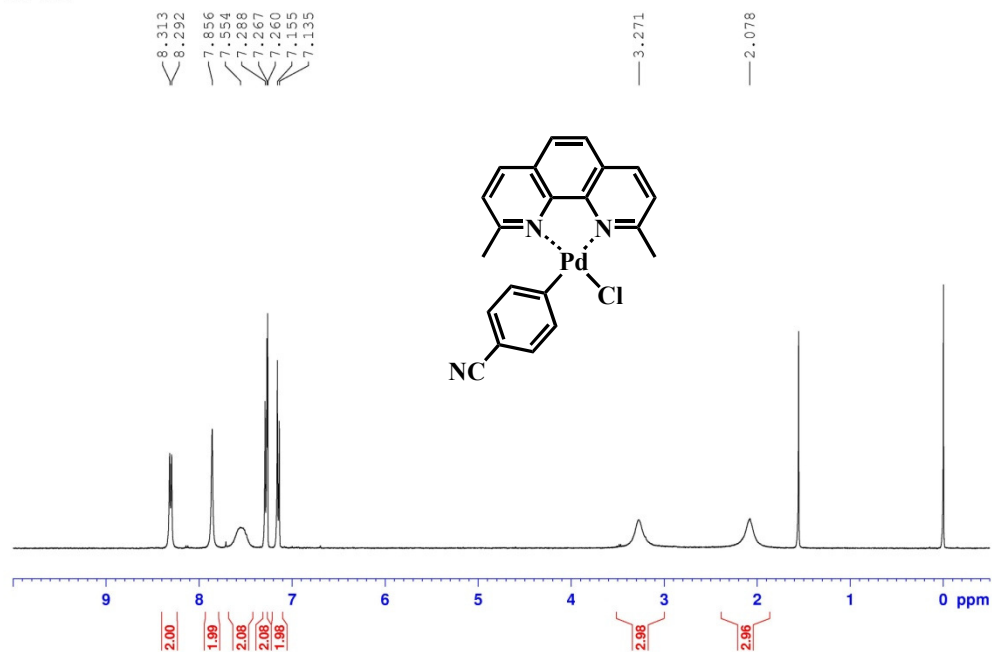

zmk-110603-4-4-CN-H-1'-C13  
400 MHz

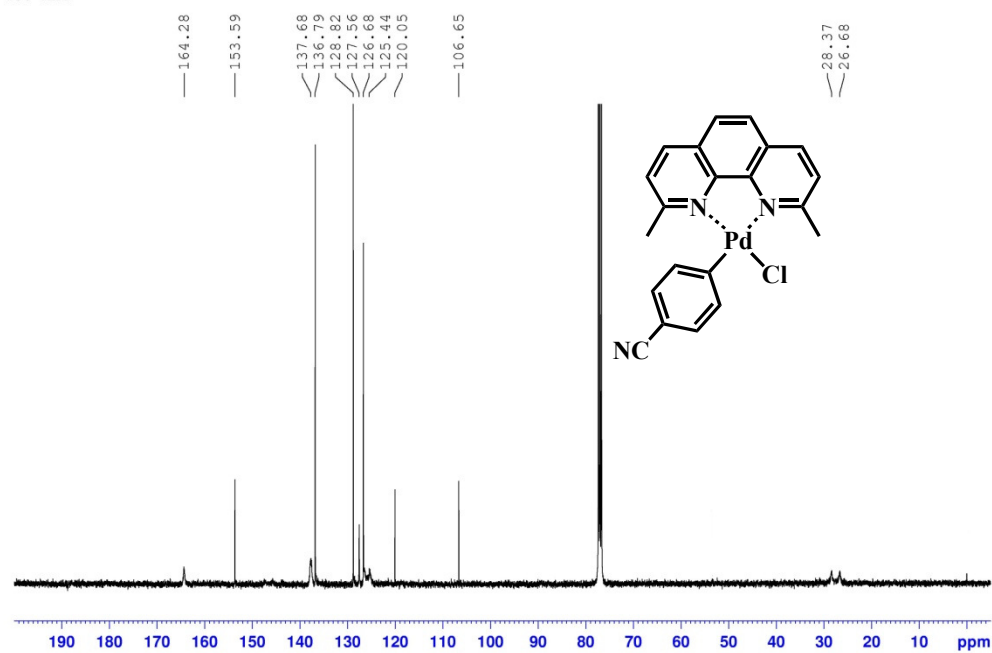

Supplement: Supplementary file 1 [file 4220047]
